# Supplementary material for: Myeloid Arginase 1 Insufficiency Exacerbates Amyloid-β Associated Neurodegenerative Pathways and Glial Signatures in a Mouse Model of Alzheimer’s Disease: A Targeted Transcriptome Analysis
Source: Front Immunol. 2021 May 11;12:628156. doi: 10.3389/fimmu.2021.628156 (PMC8144303; doi:10.3389/fimmu.2021.628156)
Supplement: Supplementary file 2 [file DataSheet_1.xlsx]

## Sheet: Contents
	Supplemental Tables
	Table S1. The differentially expressed gene transcripts in comparison of APP+/-/Arg1+/+/LysMCreTg/+ to nTg/Arg1+/+/LysMCreTg/+ mice.
	Table S2. The differentially expressed gene transcripts in comparison of APP+/-/Arg1fl/+/LysMCreTg/+ to APP+/-/Arg1+/+/LysMCreTg/+ mice.
	Table S3. The differentially expressed gene transcripts in comparison of nTg/Arg1fl/+/LysMCreTg/+ to nTg/Arg1+/+/LysMCreTg/+ mice.
	Table S4. All normalized data of the nCounter® mouse neuropathology panel gene expression profile (RNA molecule counts per 100 ng RNA).

## Sheet: Table S1
Table S1. The differentially expressed gene transcripts in comparison of APP+/-/Arg1+/+/LysMCreTg/+ to nTg/Arg1+/+/LysMCreTg/+ mice.
Symbol	Entrez Gene Name	Accession #	Log2 FC	-log10 (p-value)	Linear FC	p-value	BH-FDR	Signature Pathways
Irf8	interferon regulatory factor 8	NM_008320.3	1.53	2.33255	2.88786	0.00465	0.309	Activated Microglia, DA
C4a	complement C4A	NM_011413.2	1.39	1.3439	2.62079	0.0453	0.656	Activated Microglia, AD, Angiogenesis, DA
Gfap	glial fibrillary acidic protein	NM_001131020.1	1.17	3.19791	2.25012	0.000634	0.0819	DA, Neuronal Cytoskeleton, Vesicle Trafficking
Trem2	triggering receptor expressed on myeloid cells 2	NM_031254.2	1.1	2.90309	2.14355	0.00125	0.133	Activated Microglia, AD, DA
Mta2	metastasis associated 1 family member 2	NM_011842.3	1.01	2.13727	2.01391	0.00729	0.428	Chromatin Modification
Gba	glucosylceramidase beta	NM_001077411.1	0.99	1.451	1.98618	0.0354	0.656	Activated Microglia, Autophagy, DA, Lipid Metabolism
Cd68	CD68 molecule	NM_009853.1	0.968	3.40671	1.95613	0.000392	0.0819	Activated Microglia, Autophagy, DA
Stab1	stabilin 1	NM_138672.2	0.922	3.76955	1.89474	0.00017	0.0549	Angiogenesis, DA
Osmr	oncostatin M receptor	NM_011019.3	0.885	1.58004	1.84676	0.0263	0.636	Cytokines, DA
Hmox1	heme oxygenase 1	NM_010442.2	0.786	1.95468	1.72429	0.0111	0.446	Angiogenesis, DA, Oxidative Stress
Cd33	CD33 antigen	NM_001111058.1	0.717	1.36957	1.64376	0.0427	0.656	Activated Microglia, AD, DA
Fcrls	Fc receptor-like S, scavenger receptor	NM_030707.3	0.704	1.47886	1.62902	0.0332	0.656	Activated Microglia
C1qc	complement C1q C chain	NM_007574.2	0.604	1.98716	1.51992	0.0103	0.446	Activated Microglia, Angiogenesis, DA
Stat1	signal transducer and activator of transcription 1	NM_009283.3	0.564	1.37675	1.47836	0.042	0.656	Activated Microglia, Angiogenesis, Axon and Dendrite Structure, Growth Factor Signaling
Cd9	CD9 molecule	NM_007657.3	0.53	4.05453	1.44393	8.82e-05	0.0549	Activated Microglia, DA, Myelination
Fam126a	family with sequence similarity 126 member A	XM_006535824.2	0.422	1.38616	1.33978	0.0411	0.656	Growth Factor Signaling, Myelination
Man2b1	mannosidase alpha class 2B member 1	NM_010764.2	0.416	3.2426	1.33422	0.000572	0.0819	Autophagy
Ap1s1	adaptor related protein complex 1 subunit sigma 1	NM_007457.2	0.391	1.56703	1.3113	0.0271	0.636	Autophagy, Axon and Dendrite Structure, Neural Connectivity
Hexb	hexosaminidase subunit beta	NM_010422.2	0.374	1.35458	1.29594	0.0442	0.656	Autophagy, DA, Myelination
Il6	interleukin 6	NM_031168.1	0.371	2.05799	1.29325	0.00875	0.446	Angiogenesis, Cytokines, DA, Growth Factor Signaling, Oxidative Stress
Sgpl1	sphingosine-1-phosphate lyase 1	NM_009163.3	0.362	1.64397	1.28521	0.0227	0.636	Lipid Metabolism
Grn	granulin precursor	NM_008175.3	0.346	1.78252	1.27103	0.0165	0.533	Activated Microglia, DA
Gsr	glutathione-disulfide reductase	NM_010344.4	0.321	1.89279	1.2492	0.0128	0.459	Oxidative Stress
Naglu	N-acetyl-alpha-glucosaminidase	NM_013792.2	0.297	1.61979	1.22859	0.024	0.636	Activated Microglia, Autophagy
Gss	glutathione synthetase	NM_008180.1	0.212	1.64397	1.15829	0.0227	0.636	Carbohydrate Metabolism, Oxidative Stress
Mapk8	mitogen-activated protein kinase 8	NM_016700.3	0.202	1.34104	1.15029	0.0456	0.656	Apoptosis, Chromatin Modification, DA, Growth Factor Signaling, Transmitter Release, Transmitter Response and Reuptake, Trophic Factors, Unfolded Protein Response
Plcl2	phospholipase C like 2	NM_013880.3	0.178	1.39794	1.13131	0.04	0.656	Activated Microglia, Vesicle Trafficking
Negr1	neuronal growth regulator 1	NM_001039094.2	0.096	1.32975	1.06881	0.0468	0.656	Tissue Integrity
Stx1b	syntaxin 1B	NM_024414.2	-0.183	1.47496	0.880869	0.0335	0.656	Neural Connectivity, Transmitter Synthesis and Storage, Vesicle Trafficking
Raf1	Raf-1 proto-oncogene, serine/threonine kinase	NM_029780.3	-0.198	1.67572	0.871758	0.0211	0.636	Apoptosis, Growth Factor Signaling, Transmitter Release, Transmitter Response and Reuptake, Trophic Factors
Grin1	glutamate ionotropic receptor NMDA type subunit 1	NM_008169.2	-0.214	2.48545	0.862144	0.00327	0.264	Axon and Dendrite Structure, DA, Neural Connectivity, Transmitter Release, Transmitter Response and Reuptake, Vesicle Trafficking
Amigo1	adhesion molecule with Ig like domain 1	NM_001004293.2	-0.229	1.54363	0.853226	0.0286	0.636	Activated Microglia, Axon and Dendrite Structure, Myelination
Taf4	TATA-box binding protein associated factor 4	NM_001081092.1	-0.27	1.43063	0.82932	0.0371	0.656	DA, Transcription and Splicing
Gnao1	G protein subunit alpha o1	NM_010308.3	-0.28	1.90658	0.823591	0.0124	0.459	Axon and Dendrite Structure, Oxidative Stress, Transmitter Release, Transmitter Response and Reuptake
Mbp	myelin basic protein	NM_010777.3	-0.326	1.33255	0.797745	0.0465	0.656	Axon and Dendrite Structure, Myelination, Vesicle Trafficking
Nos1	nitric oxide synthase 1	NM_008712.2	-0.453	2.04431	0.730522	0.00903	0.446	Axon and Dendrite Structure, Chromatin Modification, DA, Neural Connectivity, Oxidative Stress, Transmitter Release, Transmitter Response and Reuptake, Transmitter Synthesis and Storage, Vesicle Trafficking
Sirt1	sirtuin 1	NM_019812.2	-0.459	1.34969	0.72749	0.0447	0.656	Angiogenesis, Carbohydrate Metabolism, Chromatin Modification, DA, Oxidative Stress
Calb2	calbindin 2	NM_007586.1	-0.46	1.31158	0.726986	0.0488	0.656	Axon and Dendrite Structure, Neural Connectivity
Atxn3	ataxin 3	NM_001167914.1	-0.537	2.32057	0.689203	0.00478	0.309	Chromatin Modification, Unfolded Protein Response, Vesicle Trafficking
U2af2	U2 small nuclear RNA auxiliary factor 2	NM_133671.3	-0.56	1.36151	0.678302	0.0435	0.656	Transcription and Splicing
Rela	RELA proto-oncogene, NF-kB subunit	NM_009045.4	-0.581	1.57349	0.6685	0.0267	0.636	Apoptosis, DA, Growth Factor Signaling, Oxidative Stress, Transmitter Response and Reuptake, Trophic Factors
Bcl2	BCL2 apoptosis regulator	NM_009741.3	-0.586	1.95861	0.666187	0.011	0.446	Activated Microglia, Apoptosis, DA, Growth Factor Signaling, Oxidative Stress, Transmitter Release, Trophic Factors, Unfolded Protein Response
Arhgef10	Rho guanine nucleotide exchange factor 10	NM_001037736.1	-0.6	1.32514	0.659754	0.0473	0.656	DA, Myelination
Olig2	oligodendrocyte transcription factor 2	NM_016967.2	-0.617	1.54668	0.652025	0.0284	0.636	Myelination
Ncl	nucleolin	NM_010880.3	-0.804	1.85078	0.572759	0.0141	0.478	Angiogenesis
Lpar1	lysophosphatidic acid receptor 1	NM_010336.2	-0.874	1.32975	0.545632	0.0468	0.656	Axon and Dendrite Structure, Myelination, Neural Connectivity, Transmitter Response and Reuptake
Ache	acetylcholinesterase	NM_009599.3	-1.07	2.84164	0.476319	0.00144	0.133	DA, Lipid Metabolism, Neural Connectivity, Transmitter Release, Transmitter Synthesis and Storage, Vesicle Trafficking
Note: DA, Disease Association; AD, AD Causal Risk Pathway.

## Sheet: Table S2
Table S2. The differentially expressed gene transcripts in comparison of APP+/-/Arg1fl/+/LysMCreTg/+ to APP+/-/Arg1+/+/LysMCreTg/+ mice.
Symbol	Entrez Gene Name	Accession #	Log2 FC	-log10 (p-value)	Linear FC	p-value	BH-FDR	Signature Pathways
C3	complement component 3	XM_011246258.1	2.15	1.69037	4.43828	0.0204	0.849	Activated Microglia, Angiogenesis, DA
Fas	Fas cell surface death receptor	NM_007987.2	1.89	1.7122	3.70635	0.0194	0.849	Apoptosis, Axon and Dendrite Structure, Cytokines, DA, Growth Factor Signaling, Oxidative Stress
Ache	acetylcholinesterase	NM_009599.3	1.11	2.92082	2.15846	0.0012	0.501	DA, Lipid Metabolism, Neural Connectivity, Transmitter Release, Transmitter Synthesis and Storage, Vesicle Trafficking
Slc2a1	solute carrier family 2 member 1	NM_011400.3	1.09	2.451	2.12874	0.00354	0.501	Activated Microglia, DA, Tissue Integrity
Epha3	EPH receptor A3	NM_010140.3	0.904	1.32698	1.87125	0.0471	0.899	Growth Factor Signaling, Tissue Integrity
Il4ra	interleukin 4 receptor, alpha	NM_001008700.3	0.84	1.39794	1.79005	0.04	0.894	Cytokines, DA
Casp6	caspase 6	NM_009811.3	0.733	1.67778	1.66209	0.021	0.849	Apoptosis
Emcn	endomucin	NM_001163522.1	0.722	1.51856	1.64947	0.0303	0.852	Angiogenesis
Ncl	nucleolin	NM_010880.3	0.682	1.53611	1.60436	0.0291	0.852	Angiogenesis
Grin2d	glutamate ionotropic receptor NMDA type subunit 2D	NM_008172.2	0.654	2.266	1.57352	0.00542	0.501	DA, Neural Connectivity, Transmitter Release, Transmitter Response and Reuptake, Vesicle Trafficking
Nos1	nitric oxide synthase 1	NM_008712.2	0.572	2.59688	1.48658	0.00253	0.501	Axon and Dendrite Structure, Chromatin Modification, DA, Neural Connectivity, Oxidative Stress, Transmitter Release, Transmitter Response and Reuptake, Transmitter Synthesis and Storage, Vesicle Trafficking
U2af2	U2 small nuclear RNA auxiliary factor 2	NM_133671.3	0.554	1.34294	1.46815	0.0454	0.899	Transcription and Splicing
Cers4	ceramide synthase 4	NM_026058.4	0.552	1.52871	1.46612	0.0296	0.852	Lipid Metabolism
Tgfbr2	transforming growth factor beta receptor 2	NM_009371.2	0.532	1.41794	1.44593	0.0382	0.894	Angiogenesis, Cytokines, Growth Factor Signaling
C1qa	complement C1q A chain	NM_007572.2	0.487	1.77211	1.40153	0.0169	0.839	Activated Microglia, Angiogenesis, DA
Usp21	ubiquitin specific peptidase 21	NM_013919.4	0.449	1.93181	1.36509	0.0117	0.685	Chromatin Modification
Bcl2	BCL2 apoptosis regulator	NM_009741.3	0.435	1.39686	1.35191	0.0401	0.894	Activated Microglia, Apoptosis, DA, Growth Factor Signaling, Oxidative Stress, Transmitter Release, Trophic Factors, Unfolded Protein Response
Taf4	TATA-box binding protein associated factor 4	NM_001081092.1	0.433	2.40894	1.35004	0.0039	0.501	DA, Transcription and Splicing
Hexb	hexosaminidase subunit beta	NM_010422.2	0.39	1.46471	1.31039	0.0343	0.873	Autophagy, DA, Myelination
Mog	myelin oligodendrocyte glycoprotein	NM_010814.2	0.352	1.53611	1.27633	0.0291	0.852	Myelination
Prkaa2	protein kinase AMP-activated catalytic subunit alpha 2	NM_178143.1	0.335	1.64397	1.26138	0.0227	0.852	Carbohydrate Metabolism, Chromatin Modification
Akt2	AKT serine/threonine kinase 2	NM_001110208.1	0.328	1.5391	1.25527	0.0289	0.852	Apoptosis, Carbohydrate Metabolism, Growth Factor Signaling, Myelination, Transmitter Release, Transmitter Response and Reuptake, Trophic Factors
Taz	tafazzin	NM_181516.5	0.325	1.95861	1.25266	0.011	0.685	Lipid Metabolism
Raf1	Raf-1 proto-oncogene, serine/threonine kinase	NM_029780.3	0.28	2.43415	1.21419	0.00368	0.501	Apoptosis, Growth Factor Signaling, Transmitter Release, Transmitter Response and Reuptake, Trophic Factors
Htt	huntingtin	NM_010414.1	0.266	1.56703	1.20247	0.0271	0.852	Axon and Dendrite Structure, DA, Neural Connectivity
Cd9	CD9 molecule	NM_007657.3	0.246	2.00261	1.18591	0.00994	0.685	Activated Microglia, DA, Myelination
Gss	glutathione synthetase	NM_008180.1	0.18	1.3536	1.13288	0.0443	0.899	Carbohydrate Metabolism, Oxidative Stress
Cntnap1	contactin associated protein 1	NM_016782.2	0.177	1.97881	1.13053	0.0105	0.685	Axon and Dendrite Structure, Myelination, Tissue Integrity
Cers2	ceramide synthase 2	NM_029789.1	0.135	1.45469	1.09809	0.0351	0.873	Lipid Metabolism
Gabrb3	gamma-aminobutyric acid type A receptor beta3 subunit	NM_008071.3	-0.255	1.45842	0.837987	0.0348	0.873	Neural Connectivity, Transmitter Release, Transmitter Response and Reuptake, Vesicle Trafficking
Prpf3	pre-mRNA processing factor 3	NM_027541.4	-0.35	1.34679	0.784584	0.045	0.899	Transcription and Splicing
Creb1	cAMP responsive element binding protein 1	NM_001037726.1	-0.521	1.81816	0.696889	0.0152	0.818	Axon and Dendrite Structure, Carbohydrate Metabolism, DA, Growth Factor Signaling, Transmitter Release, Transmitter Response and Reuptake, Vesicle Trafficking
Mta2	metastasis associated 1 family member 2	NM_011842.3	-1.1	2.28819	0.466516	0.00515	0.501	Chromatin Modification
Note: DA, Disease Association; AD, AD Causal Risk Pathway.

## Sheet: Table S3
Table S3. The differentially expressed gene transcripts in comparison of nTg/Arg1fl/+/LysMCreTg/+ to nTg/Arg1+/+/LysMCreTg/+ mice.
Symbol	Entrez Gene Name	Accession #	Log2 FC	-log10 (p-value)	Linear FC	p-value	BH-FDR	Signature Pathways
Grm8	glutamate metabotropic receptor 8	NM_008174.2	1.04	1.73049	2.05623	0.0186	0.808	Neural Connectivity, Transmitter Release, Transmitter Response and Reuptake, Vesicle Trafficking
Ggt1	gamma-glutamyltransferase 1	NM_008116.2	0.676	1.95468	1.5977	0.0111	0.808	Carbohydrate Metabolism, Lipid Metabolism
Apaf1	apoptotic peptidase activating factor 1	NM_009684.2	0.618	1.35556	1.53475	0.0441	0.808	Apoptosis, DA
P2rx4	purinergic receptor P2X 4	NM_011026.2	0.502	1.68403	1.41618	0.0207	0.808	Activated Microglia, Axon and Dendrite Structure, Neural Connectivity, Transmitter Release, Transmitter Response and Reuptake
Stab1	stabilin 1	NM_138672.2	0.429	1.81531	1.3463	0.0153	0.808	Angiogenesis, DA
Mapk8	mitogen-activated protein kinase 8	NM_016700.3	0.41	2.87615	1.32869	0.00133	0.429	Apoptosis, Chromatin Modification, DA, Growth Factor Signaling, Transmitter Release, Transmitter Response and Reuptake, Trophic Factors, Unfolded Protein Response
Ap1s1	adaptor related protein complex 1 subunit sigma 1	NM_007457.2	0.38	1.51856	1.30134	0.0303	0.808	Autophagy, Axon and Dendrite Structure, Neural Connectivity
Fxn	frataxin	NM_008044.2	0.362	1.32422	1.28521	0.0474	0.808	Oxidative Stress
Chrnb2	cholinergic receptor nicotinic beta 2 subunit	NM_009602.4	0.352	2.05404	1.27633	0.00883	0.808	Neural Connectivity, Transmitter Release, Transmitter Response and Reuptake, Transmitter Synthesis and Storage, Vesicle Trafficking
Pqbp1	polyglutamine binding protein 1	NM_001252528.1	0.348	1.34008	1.27279	0.0457	0.808	Transcription and Splicing
Usp30	ubiquitin specific peptidase 30	NM_001033202.3	0.294	1.32698	1.22603	0.0471	0.808	DA, Unfolded Protein Response
Prkaa2	protein kinase AMP-activated catalytic subunit alpha 2	NM_178143.1	0.282	1.3439	1.21588	0.0453	0.808	Carbohydrate Metabolism, Chromatin Modification
Smn1	survival of motor neuron 1, telomeric	NM_011420.2	0.228	1.40782	1.17121	0.0391	0.808	DA, Transcription and Splicing
Gss	glutathione synthetase	NM_008180.1	0.224	1.75449	1.16797	0.0176	0.808	Carbohydrate Metabolism, Oxidative Stress
Cdk5r1	cyclin dependent kinase 5 regulatory subunit 1	NM_009871.2	0.199	1.4828	1.1479	0.0329	0.808	Axon and Dendrite Structure, DA, Neural Connectivity
Ran	RAN, member RAS oncogene family	NM_009391.3	0.186	1.77989	1.13761	0.0166	0.808	DA, Transcription and Splicing
Atp6v1d	ATPase H+ transporting V1 subunit D	NM_023721.2	0.167	1.4168	1.12272	0.0383	0.808	DA, Transmitter Synthesis and Storage
Sod1	superoxide dismutase 1	NM_011434.1	0.152	1.34872	1.11111	0.0448	0.808	Axon and Dendrite Structure, Carbohydrate Metabolism, DA, Myelination, Oxidative Stress
Cers2	ceramide synthase 2	NM_029789.1	0.145	1.5784	1.10573	0.0264	0.808	Lipid Metabolism
Stx1b	syntaxin 1B	NM_024414.2	-0.187	1.5157	0.87843	0.0305	0.808	Neural Connectivity, Transmitter Synthesis and Storage, Vesicle Trafficking
Polr2k	RNA polymerase II subunit K	NM_001039368.1	-0.229	1.67985	0.853226	0.0209	0.808	DA, Transcription and Splicing
Cacna1d	calcium voltage-gated channel subunit alpha1 D	NM_028981.2	-0.256	1.60206	0.837406	0.025	0.808	DA, Growth Factor Signaling, Transmitter Release, Transmitter Response and Reuptake
Htra2	HtrA serine peptidase 2	NM_019752.3	-0.345	1.36552	0.787308	0.0431	0.808	Apoptosis, DA, Oxidative Stress
Naglu	N-acetyl-alpha-glucosaminidase	NM_013792.2	-0.376	2.10127	0.770571	0.00792	0.808	Activated Microglia, Autophagy
Lsm2	LSM2 homolog, U6 small nuclear RNA and mRNA degradation associated	NM_001110101.2	-0.398	1.67985	0.75891	0.0209	0.808	Transcription and Splicing
Grin1	glutamate ionotropic receptor NMDA type subunit 1	NM_008169.2	-0.407	4.30715	0.75419	4.93e-05	0.0319	Axon and Dendrite Structure, DA, Neural Connectivity, Transmitter Release, Transmitter Response and Reuptake, Vesicle Trafficking
Myd88	MYD88 innate immune signal transduction adaptor	NM_010851.2	-0.633	1.74715	0.644834	0.0179	0.808	DA, Neural Connectivity
Plcb3	phospholipase C beta 3	NM_008874.3	-0.724	1.73283	0.605417	0.0185	0.808	DA, Growth Factor Signaling, Transmitter Release, Transmitter Response and Reuptake, Vesicle Trafficking
Hspb1	heat shock protein family B (small) member 1	NM_013560.2	-1.13	1.72584	0.456916	0.0188	0.808	Angiogenesis, DA, Growth Factor Signaling, Oxidative Stress, Unfolded Protein Response
Dot1l	DOT1 like histone lysine methyltransferase	NM_199322.1	-1.16	1.91721	0.447513	0.0121	0.808	Chromatin Modification
Fgf2	fibroblast growth factor 2	NM_008006.2	-1.19	1.60555	0.438303	0.0248	0.808	Angiogenesis, Growth Factor Signaling
Note: DA, Disease Association; AD, AD Causal Risk Pathway.

## Sheet: Table S4
Table S4. All normalized data of the nCounter® mouse neuropathology panel gene expression profile (RNA molecule counts per 100 ng RNA).
Gene Name	Accession #	Class Name	Analyte Type	Species Name	Target Sequence	Positive Flag	nTg/Arg1+/+/LysMCreTg/+_rep1	nTg/Arg1+/+/LysMCreTg/+_rep2	nTg/Arg1+/+/LysMCreTg/+_rep3	APP+/-/Arg1fl/+/LysMCreTg/+_rep1	APP+/-/Arg1fl/+/LysMCreTg/+_rep2	APP+/-/Arg1fl/+/LysMCreTg/+_rep3	APP+/-/Arg1+/+/LysMCreTg/+_rep1	APP+/-/Arg1+/+/LysMCreTg/+_rep2	APP+/-/Arg1+/+/LysMCreTg/+_rep3	nTg/Arg1fl/+/LysMCreTg/+_rep1	nTg/Arg1fl/+/LysMCreTg/+_rep2	nTg/Arg1fl/+/LysMCreTg/+_rep3
3110043O21Rik	NM_001081343.1	Endogenous	mRNA	Mm	GTTTTGTCCTACCCTTCCGGCAAGTTATGTATGCCCCGTACCCCACCACGCACATTGATGTGGATGTCAACACTGTCAAGCAGATGCCACCGTGTCATGA	FALSE	94	65	65	90	57	41	39	63	53	72	65	86
AI464131	NM_001085515.2	Endogenous	mRNA	Mm	TAATTTCGACGAGGGCAAGTTTCCCAACGCCAGTGACATGTTCCGCCGCCTGCGAGATGCCGGCTTCCGCGTCACACTTTGGGTGCATCCGTTTGTCAAC	FALSE	99	105	133	94	73	82	41	76	82	119	100	103
Abat	NM_001170978.1	Endogenous	mRNA	Mm	GAGCCACAGTGTCATATACAGATACTTCCGCAGGTCCTTAGAGTTCAAAGGGTTTTAATCCAGGACATAAGCAGAAATCGCTCTCTTTAGTGAAGGGAGC	FALSE	1183	1156	997	1040	666	849	503	778	737	1065	985	1072
Abl1	NM_009594.4	Endogenous	mRNA	Mm	ATTGCTCTGGGAGATTGCTACCTATGGCATGTCACCTTACCCGGGAATTGACCTGTCTCAGGTTTATGAGCTGCTGGAAAAAGACTACCGCATGGAGCGC	FALSE	12	20	15	18	17	14	8	12	14	16	18	16
Acaa1a	NM_130864.3	Endogenous	mRNA	Mm	GGCATCAGAAATGGGTCTTATGACATTGGCATGGCCTGTGGGGTGGAGTCCATGTCCCTGTCTGGGATGGGGAACCCTGGGAATATCTCTTCCCGCCTGC	FALSE	150	149	154	201	151	130	79	126	124	142	115	156
Ache	NM_009599.3	Endogenous	mRNA	Mm	GCCTCAAGAAAGTATCTTCCGATTTTCCTTCGTGCCTGTGGTAGACGGGGACTTCCTCAGTGACACACCGGAGGCTCTCATCAATACTGGAGATTTTCAA	FALSE	20	27	20	22	24	16	7	11	10	25	18	28
Acin1	NM_001085472.2	Endogenous	mRNA	Mm	CTGTGGAGCACGAAGTAAAGAAAGTAACATTAGGAGATACCTTAACCCGGAGGTCCATCAGCCAACAGAAGTCTGGAGTTTCCATTACAATTGATGACCC	FALSE	316	300	357	320	270	236	133	294	208	336	302	330
Actn1	NM_134156.2	Endogenous	mRNA	Mm	CTTGGGGGTAGTGACGTTCCAGGCCTTCATCGACTTTATGTCCCGAGAGACGGCAGATACTGATACTGCAGATCAGGTCATGGCTTCCTTCAAGATCCTG	FALSE	119	123	213	153	137	100	69	159	105	136	119	160
Acvrl1	NM_009612.2	Endogenous	mRNA	Mm	AGAGAAGTGAACTGTAGGCGAGGCTTAAGAAGGGTAAAGCAGGGTTCAGGCAAGAGACAAGGTCAGCCTCCATCTTGGGAAGACCTGGCCTAGAAACTAT	FALSE	12	5	8	12	11	14	5	7	8	4	11	15
Adam10	NM_007399.3	Endogenous	mRNA	Mm	CATTCAGCAGCCCCCGCGTCAGAGGCCCCGAGAGAGTTATCAAATGGGACACATGCGACGCTAATGCAGCTTTTGCCTTGGTTCTTCCTAGTGCCTACAG	FALSE	396	381	381	462	330	305	209	344	310	362	363	408
Adcy5	NM_001012765.4	Endogenous	mRNA	Mm	CTCTGGACTCTAATTCGTAGCTACTTCTCACCTCGGGGCTGCGCTGTCTCCCCGCTAGCCTTCCCGTTGTCCTCCACCGCTCAGGACGGGGGTGCCACGA	FALSE	6	9	12	13	8	7	4	9	9	10	9	6
Adcy8	NM_009623.2	Endogenous	mRNA	Mm	AAAACTATCAGGTTTGTGAGATCCAGAACGAAGCACGATGTTGACATGCGAATTGGAATCCATTCAGGTTCTGTGCTATGTGGTGTGTTGGGCCTGAGGA	FALSE	122	112	109	111	98	69	59	74	74	105	86	101
Adcy9	NM_009624.1	Endogenous	mRNA	Mm	CTGGTGTGGAGTGCCGTATCCAGGTGAGCGAAGAGAGCTACCGTGTGCTGAGCAAGATGGGTTATGACTTTGACTACCGAGGGACCGTGAATGTCAAGGG	FALSE	230	213	276	288	238	183	137	216	184	226	250	294
Adcyap1	NM_001315503.1	Endogenous	mRNA	Mm	TCCTCAGGCATTGTGACCCGGGATGCAGTTTGCAGCTTTAGTGCCTTTCTTTGCCTTTTAAATCGCCACGAATCACTGATGGCTATTTAGTGGCCCTACA	FALSE	26	20	15	35	10	12	8	21	12	17	10	21
Adora1	NM_001008533.3	Endogenous	mRNA	Mm	AAGTGTGAGTTCGAGAAGGTTATCAGCATGGAGTACATGGTCTACTTCAACTTCTTCGTCTGGGTGCTGCCGCCATTGCTCCTCATGGTTCTTATCTACC	FALSE	234	184	208	211	197	147	84	171	146	203	152	201
Adora2a	NM_009630.2	Endogenous	mRNA	Mm	ACTATGAAAGGCAGGGTGCCAGAGTGTGGGCTCACGTCTCAGGATTGAGTTTAGAGACATCAAGTCATGGACCCGAGCTGGATAGTTCAGAGCTGCCCTG	FALSE	5	1	5	1	2	4	3	1	1	2	1	1
Adra2a	NM_007417.4	Endogenous	mRNA	Mm	GTGACTACTGAATTGCCAAAGTCAGGGGGTAGGCGGAGACTTCGTGTTTACAACCTGGTTTCTACTTATTTTAGGCAGACTGTGGAAGGCCTGTGATCTG	FALSE	103	87	72	90	58	72	56	66	63	92	117	102
Adrb2	NM_007420.2	Endogenous	mRNA	Mm	GATTGTATCTGGCCTTACCTCCTTTTTGCCTATCCAGATGCACTGGTACCGTGCCACCCACAAGAAAGCTATCGATTGTTACACCGAGGAGACTTGCTGT	FALSE	13	12	11	15	9	9	7	8	7	9	14	12
Ager	NM_007425.2	Endogenous	mRNA	Mm	CAACTACCGAGTCCGAGTCTACCAGATTCCTGGGAAGCCAGAAATTGTGGATCCTGCCTCTGAACTCACAGCCAGTGTCCCTAATAAGGTGGGGACATGT	FALSE	5	1	4	5	3	4	4	3	2	3	6	5
Aif1	NM_019467.2	Endogenous	mRNA	Mm	CTGGAGCAGCCTGCAGACTTCATCCTCTCTCTTCCATCCCGGGGAAAGTCAGCCAGTCCTCCTCAGCTGCCTGTCTTAACCTGCATCATGAAGCCTGAGG	FALSE	5	2	4	3	4	5	2	3	3	7	2	3
Akt1	NM_001165894.1	Endogenous	mRNA	Mm	GCCATGAAGATCCTCAAGAAGGAGGTCATCGTCGCCAAGGATGAGGTTGCCCACACGCTTACTGAGAACCGTGTCCTGCAGAACTCTAGGCATCCCTTCC	FALSE	437	422	412	478	394	416	220	395	373	425	469	456
Akt1s1	NM_026270.4	Endogenous	mRNA	Mm	CGGCCCAGCAAGAGAACAATTCTTTCCGGGATTGGCTGGCTCAGGTTGGGCGGGGCCGGTTCTAAACGCTCCAAGGGTCAACTCTGTTTCTTGCCTAGCA	FALSE	162	158	196	185	167	148	86	131	127	167	167	183
Akt2	NM_001110208.1	Endogenous	mRNA	Mm	CCGCTCGGCCCCTTTGGATGGCTCCGTTCTCTGCCTGGGGCAGAGGGAAGCCAACCTTGGCTGTTACACATCTCACACCAAGACAGTATTGGGCCCCTTG	FALSE	81	76	73	98	65	73	40	51	53	72	60	83
Akt3	NM_011785.3	Endogenous	mRNA	Mm	GTTGTCATGTTAGCAAGCGCAGCTCCAATTCACAGATCATTGCCTGCGTTTTCTTTTGACCCATGTGCAAGGAATGTACACACCCATTAGAATCATGCAC	FALSE	829	768	635	720	494	549	402	582	517	741	775	748
Aldh1l1	NM_027406.1	Endogenous	mRNA	Mm	GACGGCGAGAGCGAGTGTGTCATTAACTACGTGGAAAAGGCAGTGAAGAAACTGACTCTCCAAATGCCCTACCAGCTCTTCATAGGCGGCGAGTTTGTGG	FALSE	440	503	433	481	290	420	255	315	303	405	441	433
Amigo1	NM_001004293.2	Endogenous	mRNA	Mm	CAGCTGCAGAAACTCTACTTAAGCCAGAATCAGATCTCTCGCTTTCCTGTGGAACTGATCAAGGATGGGAACAAATTACCCAAACTGATGCTCTTGGATC	FALSE	167	162	151	170	134	122	76	111	97	170	178	155
Amph	NM_175007.1	Endogenous	mRNA	Mm	TATGGACGACAAGCACTGATTTGGTACAACCAGCTTCTGGGGGTTCATTTAATGATTTCACCCAGGCCCAGGACACTTCATTATTCACCATGCAGACAGA	FALSE	205	216	213	232	160	150	128	186	142	182	229	216
Ang	NM_007447.2	Endogenous	mRNA	Mm	AGTACCGAGCCTCTGCAGGGTTCAGACATGTTGTTATTGCCTGTGAGAATGGCTTGCCGGTCCACTTCGATGAGTCATTTTTCAGTCTATAGTCAGCAGG	FALSE	1	2	4	4	3	4	1	3	2	6	2	2
Angpt2	NM_007426.3	Endogenous	mRNA	Mm	GAAGAATGTTCCGTGGGAGTTCAGCAGTAAATAACTGGAAAACAGAACACTTAGATGGTGCAGATAAATCTTGGGACCACATTCCTCTAAGCACGGTTTC	FALSE	6	2	2	3	1	2	1	1	1	1	3	3
Ap1s1	NM_007457.2	Endogenous	mRNA	Mm	AGCCATCCCTCGCCCTCCATGTGCCCTGTATGGCTGTAAATATATAAATACGTCAGGTTAAAGGGAAAAGGTTTCCAGGGCTCTTTTCTCTCCTCTGCCC	FALSE	448	615	505	734	485	464	396	495	500	657	624	648
Ap2a2	NM_007459.3	Endogenous	mRNA	Mm	CAACATTGAGTGTATATCTGATTTCACAGAGGCACCTGTCCTCAACATCCAGTTCAGGTATGGTGGGACCTTCCAGAATGTGTCTGTTAAGCTTCCCATC	FALSE	783	732	697	758	521	523	384	585	563	715	740	682
Ap2b1	NM_001035854.2	Endogenous	mRNA	Mm	CATGCAGGTAACAAGAGTGAAAGCAGAGCTGACATTTGCCAGGCTTTCCTGGAGCAGGCCAGTGAGTGTAGACGTGTGTAAAGATGTCGCCAGTTCTCAC	FALSE	762	695	687	777	515	524	330	653	512	663	651	685
Ap3m2	NM_029505.3	Endogenous	mRNA	Mm	CTGTGACACTGCATTTCATCACTTTTAACACAGTTGCCGTGGGGAAAGACCGGCCTGTGATGTTTGGTTTCAGTCACCTAAACCCAATGGAAGATGTCTC	FALSE	333	291	285	367	256	221	160	269	216	310	304	345
Ap3s1	NM_009681.5	Endogenous	mRNA	Mm	AGCCCGTGCTGTATCAGCTGTAAAGAATATGAATCTTCCTGAGATCCCAAGAAATATTAACATTGGTGACATCAGTATAAAAGTGCCAAACCTGCCCTCT	FALSE	854	853	785	870	597	634	443	688	618	787	786	890
Ap4s1	NM_021710.3	Endogenous	mRNA	Mm	CTACGAGCATGTGGACATTAATAAACGTGCGCTTCTGGAGACTGAGGTCAGCAAGAGTTGCCTGTCTCGGTCCAGCGAACAATGCTCATTCATTGAATAC	FALSE	791	773	768	843	617	605	376	655	541	763	725	799
Apaf1	NM_009684.2	Endogenous	mRNA	Mm	TGACGTGTGAAGCGGTAACACATACTTCCCCTTTTACCTGTACATCACCCATGCTGTTCTCTCCACGACTTTCAAGAGTCGCAGAAACCCTTCCCCAAAA	FALSE	41	32	24	38	24	24	17	31	17	43	56	35
Apc	NM_007462.3	Endogenous	mRNA	Mm	CCATGGGGTCATTCCCAAGAAGAACATTTGTAAATGGAAGCAGAGAGAGTACTGGGTATCTAGAAGAGCTTGAAAAAGAAAGATCATTACTCCTTGCTGA	FALSE	1838	2026	1821	1837	1476	1568	898	1368	1474	1796	1560	1682
Apoe	NM_001305844.1	Endogenous	mRNA	Mm	CCTGCAGGCGGAGATCTTCCAGGCCCGCCTCAAGGGCTGGTTCGAGCCAATAGTGGAAGACATGCATCGCCAGTGGGCAAACCTGATGGAGAAGATACAG	FALSE	1006	1042	954	999	816	1053	529	770	783	913	939	1017
App	NM_007471.2	Endogenous	mRNA	Mm	GTGAGCGACGCCCTTCTCGTGCCCGACAAGTGCAAGTTCCTACACCAGGAGCGGATGGATGTTTGTGAGACCCATCTTCACTGGCACACCGTCGCCAAAG	FALSE	3242	2858	3290	3856	3162	2417	1780	3115	2319	3123	2999	3663
Aqp4	NM_009700.2	Endogenous	mRNA	Mm	CAAAGGAGTCTGGACTCAGGCTTTCTGGAAGGCAGTCTCAGCAGAATTTCTGGCCACGCTTATCTTTGTTTTGCTCGGTGTGGGATCCACCATAAACTGG	FALSE	234	240	188	298	208	247	118	146	206	211	179	228
Arc	NM_018790.2	Endogenous	mRNA	Mm	TGCAGTCTGAGTAGGCCTTGTTGCGGTTCCTCCATCTGCCTGGTCTATTGGTGTTCTGAGACCAATTCCACTGATGTTCTGACAGATCCTCCACCCTGTG	FALSE	121	292	121	155	169	51	66	59	101	424	100	90
Arhgap44	NM_001099288.1	Endogenous	mRNA	Mm	GGACCAGCTTTCTGCTGACATGTACAGTTTTGTGGCCAAAGAAATTGACTATGCAAACTACTTTCAAACGCTAATAGAAGTGCAAGCTGAGTACCACAGG	FALSE	171	143	139	123	117	129	76	122	99	128	166	159
Arhgef10	NM_001037736.1	Endogenous	mRNA	Mm	GGCTCCTTCATCAGGACCAGGTCCTTGGTCTCTCAAGATCACAGGTGTTATTTTGAAGAAGAGCAGAATTTGTTCATTGACGTGGACTGCAAGCACCCGG	FALSE	59	41	71	60	33	31	21	33	26	43	49	37
Arrb2	NM_145429.4	Endogenous	mRNA	Mm	TAATGTCAACGTCCATGTCACCAACAATTCTGCCAAGACCGTCAAGAAGATCAGAGTGTCTGTGAGACAGTACGCCGACATTTGCCTCTTCAGCACCGCG	FALSE	182	156	153	204	121	141	81	179	132	145	171	180
Arsa	NM_009713.4	Endogenous	mRNA	Mm	TTCACCAGAGGGACAGGGACAAGTGTGTAGTTTGTATCTGGTAATGTAATAACACCAGCTGAGACTTGAGACGTGCTAATTCATCTAGTCCTTGTGGTAA	FALSE	92	81	75	107	85	77	56	94	54	98	79	106
Atcay	NM_178662.3	Endogenous	mRNA	Mm	TCATTCCAAGGGAAGAAGTTGTATCCACTTTCCTATCCTCTGCCCAGACCAGACTCAGCCTCTGTGTCATCAAGTAGGAGACATTTGGTGTCTGAGAAGA	FALSE	655	652	586	770	524	504	321	599	467	644	616	670
Atf4	NM_009716.2	Endogenous	mRNA	Mm	CAAGGAGGATGCCTTTTCCGGGACAGATTGGATGTTGGAGAAAATGGATCTGAAAGAGTTTGACTTCGATGCTCTGTTTCGAATGGATGACCTGGAAACC	FALSE	892	893	898	1099	910	516	489	726	598	990	742	773
Atf6	NM_001081304.1	Endogenous	mRNA	Mm	TCACTCCACCTGTTACTAGATAATTTTGTGCCCTGGGCTGATGGTACTGTGATGTTGGGAAGTGTTGCTAGAGGCTGGCAGTGTGGTCTTTCCTGTGTTT	FALSE	137	127	128	147	99	88	59	116	96	132	113	143
Atg5	NM_053069.5	Endogenous	mRNA	Mm	CAGTTTTGGGCCATCAACCGGAAACTCATGGAATATCCTCCAGAAGAAAATGGATTTCGTTATATCCCCTTTAGAATATATCAGACCACGACGGAGCGGC	FALSE	195	188	158	217	167	138	98	164	128	167	169	212
Atm	NM_007499.2	Endogenous	mRNA	Mm	TTCCTCAAAGTGAAAGTCATGACATTTGGATAAAGACACTGACGTGTGCCTTTCTGGACAGTGGAGGCATAAACAGTGAAATTCTCCAGTTATTAAAGCC	FALSE	49	66	61	55	54	45	34	55	42	57	61	57
Atp13a2	NM_029097.2	Endogenous	mRNA	Mm	GGTGACTCGGACAGGGTTCTGCACAGCCAAAGGGGGCCTGGTGAGCTCCATCCTGCACCCAAGGCCCATCAGCTTCAAGTTCTACAAACACAGCATGAAG	FALSE	152	152	153	157	135	129	81	142	108	165	151	153
Atp2b3	NM_177236.3	Endogenous	mRNA	Mm	AAAGCAGGATTGGTGATGTCTGCTATCACTGTCATCATTCTGGTCCTCTACTTTGTGATTGAGACCTTTGTCGTGGATGGCCGGGTATGGCTGGCAGAGT	FALSE	207	193	205	237	202	157	112	170	153	166	165	230
Atp6v0c	NM_009729.3	Endogenous	mRNA	Mm	GCCTCTACGGTCTCATCGTGGCCCTAATCCTCTCCACAAAGTAGTCCTTTTCCACCATCAGTCACAGGATAGGATGTAAAGATCACCCCTCCTCATTCCA	FALSE	2008	1967	1962	2460	1973	1559	1267	1886	1369	2065	2063	2353
Atp6v0d1	NM_013477.3	Endogenous	mRNA	Mm	GGACCTTGATGAGATGAACATCGAGATAATCCGAAATACGCTTTACAAGGCCTACTTGGAGTCCTTCTACAAGTTCTGTACTCTGTTGGGTGGGACCACA	FALSE	2124	1831	1767	2257	1697	1493	1053	1797	1527	1860	1873	2065
Atp6v0e	NM_025272.2	Endogenous	mRNA	Mm	GGCTTTGAATATGGCTCTTGCCAGCTCACAACATGAGAGTCAGCGATGTGTTTAAGAATTGCTGCGAGACAAACAAGACTCGGCGGGACAGTCAGGAGTG	FALSE	31	35	43	49	29	30	13	21	24	28	45	30
Atp6v0e2	NM_133764.3	Endogenous	mRNA	Mm	TTTAACTCTGTCTCCACCGTGTTGAAATATTGGGTCAGGGTCACAGGCCTCCTCCAGCTCTGAAGTGAATGATATCCATTTAGTCTCTGACACTTGTAGA	FALSE	1374	2315	1177	2817	2008	1457	998	1711	1865	1777	1923	1926
Atp6v1a	NM_007508.5	Endogenous	mRNA	Mm	AGTCAATGTGTCTGCTCTCAGCAGAGATATCAAATGGGAGTTTATACCCAGCAAAAACCTACGGGTTGGTAGTCATATCACTGGTGGAGACATTTATGGG	FALSE	2015	1819	2005	2298	1814	1458	1016	1793	1398	1914	2110	2195
Atp6v1d	NM_023721.2	Endogenous	mRNA	Mm	GGGACTTCAGCACCACAGTTATCCAAAATGTAAATAAAGCCCAAGTGAAGATCAGAGCAAAGAAAGACAATGTAGCAGGTGTTACCTTGCCAGTGTTTGA	FALSE	1263	1199	1269	1426	1136	930	683	1169	901	1281	1267	1453
Atp6v1e1	NM_007510.2	Endogenous	mRNA	Mm	GAGTGAGTTGTGCATGCTGTCCCTGCTCTTTGGGCATAAAGTGCATGTGGGACTCACATTCCTCCAGGAACACTACCTTCGCTGTTACTGTTTAGGTCTA	FALSE	1098	1002	898	1152	765	790	625	950	775	991	1166	1273
Atp6v1g2	NM_023179.3	Endogenous	mRNA	Mm	GAATGACAGCAACAACGCTCACTTTGTAAGGTGGCTGCTGTGAATTATCTGTGAGAATTCAGCATAGTTCCAGATGACGGAGTGCCTGTATCATGACCGC	FALSE	599	505	439	559	387	393	278	438	325	515	485	544
Atp6v1h	XM_006495434.2	Endogenous	mRNA	Mm	TGGAAAAACTTGGTGAGAGTGTCCAGGACCTTAGCTCATTTGATGAATACAGTTCAGAACTTAAATCTGGAAGATTGGAATGGAGCCCTGTACACAAGTC	FALSE	2222	2214	1951	2425	1848	1517	1202	2008	1569	1968	2120	2335
Atp7a	NM_001109757.2	Endogenous	mRNA	Mm	TACAGAGTTAGTATTGCAAGTGAAGTTGAAAGTACCGCCAGCTCTCCCTCCAGCTCATCTCTTCAGAAGATGCCTTTGAACATAGTTAGCCAGCCTCTGA	FALSE	39	38	54	35	32	43	11	33	28	32	39	28
Atp8a2	NM_015803.2	Endogenous	mRNA	Mm	GAGGCACCGGCCCGCATAATTTACCTCAACCAATCTCATCTCAACAAATTCTGCGACAACCGGATCAGTACGGCCAAGTACAGCGTGTTGACATTTCTAC	FALSE	156	149	224	172	169	125	82	160	114	177	157	159
Atrn	NM_009730.2	Endogenous	mRNA	Mm	TAAGGATCAGTATGCAGTGGTTGGACACTCAGCACACATTGTTACACTGGCATCTGGCCGTGTGGTCATGTTGGTCATCTTCGGTCATTGCCCACTCTAT	FALSE	411	371	391	398	354	305	213	324	275	373	361	441
Atxn2	NM_009125.2	Endogenous	mRNA	Mm	CCGCCCGCTTACTCCACTCAGTACGTTGCCTACAGCCCTCAGCAGTTTCCCAATCAGCCTTTGGTCCAGCATGTGCCGCATTATCAGTCTCAGCATCCTC	FALSE	409	367	412	364	329	338	208	370	321	416	391	446
Atxn3	NM_001167914.1	Endogenous	mRNA	Mm	CTGGAGCGCGTCTTAGAAGCAGCTGATGGGTCGGGCATATTTGATGAAGATGAGGATGATTTACAGAGGGCTCTAGCCATAAGTCGCCAGGAAATCGACA	FALSE	72	67	85	63	52	51	25	46	41	56	55	72
Atxn7	NM_139227.4	Endogenous	mRNA	Mm	GTGAGCTGCATCCTGAGAGCCTCCTAGAGGATACCTGGCTTTAGAGTTTTATAGCGCTGTTGAGGAATAGTACACTGAGATGTTTGTTGGTCAGTGCGTC	FALSE	20	12	11	6	16	11	8	10	5	11	14	11
Avp	NM_009732.2	Endogenous	mRNA	Mm	CGCCAGGATGCTCAACACTACGCTCTCCGCTTGTTTCCTGAGCCTGCTGGCCTTCTCCTCCGCCTGCTACTTCCAGAACTGCCCAAGAGGCGGCAAGAGG	FALSE	3	5	3	2	2	5	2	3	1	2	4	7
Axin2	NM_015732.4	Endogenous	mRNA	Mm	ACCGCGAGTGTGAGATCCACGGAAACAGCTGAAAACGGATTCAGGTCCTTCAAGAGAAGCGACCCAGTCAATCCTTATCACGTAGGTTCCGGCTATGTCT	FALSE	46	54	33	32	31	40	26	24	33	44	53	43
B4galt6	NM_019737.2	Endogenous	mRNA	Mm	CACCTGATTCCGATGCTCCAGAAACAGCGGCTGGAATTTGCCTTTTATGTCATCGAACAGACCGGCACACAACCATTCAATCGTGCGATGCTCTTTAATG	FALSE	677	572	556	679	518	449	275	573	445	585	607	658
Bace1	NM_011792.4	Endogenous	mRNA	Mm	CTTTATGGAATACTGAGTGGGTTCATTCCTCTCTTGCCCTCTCCAATGGCCCCTCTATTTATCTGGCTAAGGAAACACCACGCATTGGCTAGTATTAAAC	FALSE	279	218	216	297	201	172	130	203	164	248	228	280
Bad	NM_007522.3	Endogenous	mRNA	Mm	TTCGAGGCCTTAGGAAAAAAAAAGAGGATCGCTGTGTCCCTTTAACAGGGAGAAGAGCTGACGTACAGCTTGAGTCCCTTCCGGTGCGTGCAATAGCCAC	FALSE	136	128	119	137	124	99	76	109	83	112	129	116
Bax	NM_007527.3	Endogenous	mRNA	Mm	CATAAATTATGACATTTTCCTGGGATGAATGGGGGAAGGGGAAAGGCATTTTTCTTACTTTTGTAATTATTGGGAGGGGTGGGAATGGTGGCCTGGGGAG	FALSE	23	31	22	26	18	17	11	17	10	16	23	17
Bcas1	NM_029815.2	Endogenous	mRNA	Mm	GGTGGTCGATACCACAGAGAACAGCAGCTCCATCATGAGCTTCTTCAAGACACTGGTTTCACCTAACAAGACTGAAACAAAGAAGGACCCAGAAGACACG	FALSE	465	379	485	364	318	328	162	258	314	406	321	346
Bcas2	NM_026602.3	Endogenous	mRNA	Mm	GCTCCGCAGACTCAGCGGGGACTTTCTCGGAGCGACTGTGGTGGTTACATGGTTAGAGACCATGGACTATGTAAACTGTTGTATTGCTTCTGTGTGAGTG	FALSE	575	538	481	683	453	459	297	480	426	554	578	582
Bche	NM_009738.3	Endogenous	mRNA	Mm	GCATACCAAGGTAACACAGACCCACTTCCTCCTATGGATTCTTCTGCTCTGCATGCCTTTTGGGAAGTCACACACTGAAGAAGACTTCATAATTACAACC	FALSE	16	22	18	12	11	14	11	15	13	16	27	11
Bcl2	NM_009741.3	Endogenous	mRNA	Mm	GGCCTTCTTTGAGTTCGGTGGGGTCATGTGTGTGGAGAGCGTCAACAGGGAGATGTCACCCCTGGTGGACAACATCGCCCTGTGGATGACTGAGTACCTG	FALSE	51	44	63	42	43	43	18	32	27	43	38	41
Bcl2l1	NM_009743.4	Endogenous	mRNA	Mm	GAGCAACCGGGAGCTGGTGGTCGACTTTCTCTCCTACAAGCTTTCCCAGAAAGGATACAGCTGGAGTCAGTTTAGTGATGTCGAAGAGAATAGGACTGAG	FALSE	207	208	217	206	182	175	124	179	158	202	217	196
Bdnf	NM_007540.4	Endogenous	mRNA	Mm	AGTCCCGTCTGTACTTTACCCTTTGGGGTTAGAAGTCAAGTTGGAAGCCTGAATGAATGGACCCAATGAGAACTAGTGTTAAGCCCATTTCCCTAGTCAG	FALSE	111	145	102	113	85	57	56	102	75	106	91	124
Becn1	NM_019584.3	Endogenous	mRNA	Mm	TCTGGAGTCTCTGACAGACAAATCTAAGGAGTTGCCGTTATACTGTTCTGGGGGTTTGCGGTTTTTCTGGGACAACAAGTTTGACCATGCAATGGTAGCT	FALSE	334	350	281	378	276	295	182	271	259	316	260	380
Bid	NM_007544.3	Endogenous	mRNA	Mm	AATCATGCACACGACTTATCTGTGTGGTGTCAGTTACACTCAGGCTCTTGCTACGGAATGCAAAGAACAACTCACATACCAGTGTCAAACAGAATGCACA	FALSE	36	30	22	49	29	31	18	22	19	21	34	28
Bnip3	NM_009760.4	Endogenous	mRNA	Mm	TGTGGCCTTATAATCCTATTACATAGCAGAAAATTAAAGGGTGCGTGCGGGTTATCTGTAAAGGCCTCTAACTTTGTGAACTGAGTAGCAAGTAGAAGCT	FALSE	1877	1656	1472	1838	1248	1333	944	1490	1234	1718	1821	1860
Brms1l	NM_001037756.2	Endogenous	mRNA	Mm	TGCTGCCTGTGTTTCTTCTGAGCTTTTAGAGGGGCAGGTATCCTGCCTGGTGTTTATGATGCGCAGTGCCAGAGTGACAAGTGGCTGGCAGTATTGTCGT	FALSE	164	148	140	171	139	100	78	133	117	137	153	166
C1qa	NM_007572.2	Endogenous	mRNA	Mm	CAGTGCCCGGCTTCTATTACTTCAACTTCCAAGTGATCTCCAAGTGGGACCTTTGTCTGTTTATCAAGTCTTCCTCCGGGGGCCAGCCCAGGGATTCCCT	FALSE	107	155	134	281	171	188	102	113	126	102	125	139
C1qb	NM_009777.2	Endogenous	mRNA	Mm	GTGCCAACAGCATCTTCACTGGCTTTCTGCTTTTCCCTGACATGGATGCGTAATCACGGGGTCAAATTACACCTATCCAACACCATCTTCCTGCCTCCCT	FALSE	391	511	315	662	490	614	332	341	457	369	437	402
C1qc	NM_007574.2	Endogenous	mRNA	Mm	CAGAGGGGCGATGAGGTGTGGCTATCAGTCAATGACTACAATGGCATGGTGGGCATAGAGGGCTCCAACAGCGTCTTCTCTGGTTTCCTACTGTTTCCCG	FALSE	201	223	170	385	278	356	192	179	230	180	200	216
C3	XM_011246258.1	Endogenous	mRNA	Mm	TGGGTGGAGCACTGGCCTGAGGCAGAAGAATGCCAGGATCAGAAGTACCAGAAACAGTGCGAAGAACTTGGGGCATTCACAGAATCTATGGTGGTTTATG	FALSE	2	10	11	17	13	22	4	6	7	4	5	16
C4a	NM_011413.2	Endogenous	mRNA	Mm	CTGGACATGAAGAACACCACATGCCAGGACCTTCAGATAGAAGTGAAGGTCACAGACGCTGTGGAATATGCATGGAGCGCCTACGAAGACTATGAAGACG	FALSE	15	10	6	27	18	14	11	9	22	13	5	11
C6	NM_016704.2	Endogenous	mRNA	Mm	CTGATTGACAAGAGTGAAGCCTGTTTCTGTGACCACTACCCATGGACTCACTGGTCCAGCTGTTCTAAGTCCTGCAATTCTGGAACCCAGAGCAGACAGA	FALSE	3	5	3	1	8	6	1	1	2	4	5	8
Cab39	NM_133781.4	Endogenous	mRNA	Mm	TAGAATGGTGTCTGTCTGTCTTAGTGACACACGGATCACAACTAACAACTTAAAATCAGAGTTTGCCCGATCCAATTCAGCATGGCTGTAGCTGACTAAA	FALSE	664	602	503	680	408	482	330	524	393	603	561	589
Cacna1a	NM_007578.3	Endogenous	mRNA	Mm	AGCATCAAAAGTGCCAAGCTGGAGAACTCGACTTTTTTTCACAAGAAGGAGAGAAGAATGCGTTTCTACATCCGCCGCATGGTCAAAACTCAGGCCTTCT	FALSE	441	426	457	442	406	347	186	340	329	384	324	401
Cacna1b	NM_001042528.1	Endogenous	mRNA	Mm	ACAAACAGTCGTTCCAGTATAAGACATGGACATTCGTGGTCTCTCCACCCTTTGAGTACTTCATCATGGCTATGATAGCCCTCAACACAGTGGTGCTGAT	FALSE	97	86	108	121	96	79	56	96	77	91	96	97
Cacna1c	NM_001159535.1	Endogenous	mRNA	Mm	AAGGCCATGGTGCCTCTGCTGCACATTGCCCTTCTTGTGCTCTTCGTCATCATCATTTATGCTATTATCGGCCTGGAGCTCTTCATGGGAAAGATGCACA	FALSE	111	103	125	109	119	88	51	98	75	103	98	99
Cacna1d	NM_028981.2	Endogenous	mRNA	Mm	ACAACTTTTGGAGCCTTCTTGCACAAAGGGGCTTTCTGCAGGAACTACTTCAATTTGCTGGACATGCTGGTTGTTGGGGTGTCGCTGGTGTCCTTTGGGA	FALSE	113	113	116	118	97	68	58	84	82	93	88	96
Cacna1f	NM_019582.2	Endogenous	mRNA	Mm	AATGCTAGCCAGCCTTCCAGGAAATCGATGTGACCCTGAGTCTGACTTTGGCCCAGGCGAGGAATTTACCTGTGGTAGCAGTTTTGCCATCGTCTACTTC	FALSE	4	3	3	8	3	5	1	3	4	3	8	3
Cacna1s	NM_014193.2	Endogenous	mRNA	Mm	GCTTTCACCATCATCTTCACCCTGGAGATGGTCCTCAAGCTCATAGCTTTCAAGCCCAGGGGCTATTTTGGAGATCCTTGGAATGTGTTTGACTTCCTAA	FALSE	6	4	3	5	3	5	1	4	3	7	5	3
Cacnb2	NM_023116.3	Endogenous	mRNA	Mm	AGGGAATTCATCATCCAGTTTGGGTGACATAGTGCCCAGTTCCAGAAAATCGACACCGCCGTCATCTGCTATAGACATAGATGCTACTGGCTTAGATGCA	FALSE	210	201	197	237	167	148	105	189	151	204	173	247
Cacnb4	NM_146123.2	Endogenous	mRNA	Mm	AAATCTCCCAACAAACAGCTCGATCTGTGTTTACGCAGGGGCCTTTCTTGCCCTGCCTGCATACTACTACATACACTTCATGGAAATCAGTGTGGATTCC	FALSE	838	781	659	857	570	525	403	668	591	747	708	803
Cadm3	NM_053199.3	Endogenous	mRNA	Mm	GGGCTCCTTGTCTCCCAGCACCCGCTTTTGGGGAAACAACTTTTCCTCTTCGAGCTGAACCACTCTGTCCATATTACACAGAAGCCATATTTGTACCAGG	FALSE	683	556	576	720	561	461	365	528	436	611	561	671
Cadps	NM_001042617.1	Endogenous	mRNA	Mm	GGATCAGGTACATCAGAAGATTTGTTCTGGAAACTTGATGCCCTTCAGACTTTCATCCGTGACCTACACTGGCCTGAGGAAGAGTTTGGAAAACACTTAG	FALSE	3995	3719	3909	4192	3315	3200	2027	3339	2796	3642	3457	3681
Calb1	NM_009788.4	Endogenous	mRNA	Mm	ATGGAAAAATAGGAATTGTAGAGTTGGCTCACGTCTTACCCACAGAAGAGAATTTCTTGCTGCTCTTTCGATGCCAGCAACTGAAGTCCTGCGAGGAATT	FALSE	406	417	460	585	381	317	272	428	316	334	468	480
Calb2	NM_007586.1	Endogenous	mRNA	Mm	TCCAGGTTCTGCCCACCAGCTTGCTTAATGATCTAGCTGTCTTCTCAGAGCTACTGTGGAGGGTGACTGCCCTCTCCTTGTGTTCTTGACGTGTGTGTTC	FALSE	108	75	66	91	65	52	30	59	40	61	83	86
Calm1	NM_009790.4	Endogenous	mRNA	Mm	GGTCAGCATACACAGAGACACGCAACATCCAGTGCAAGCTGGATTTCCCACCAGGTTCTCTAGCCACAACTCCTGAAACCAGACAGACTCGGAGTTCTTT	FALSE	5871	6673	4916	6082	3886	4947	2982	4556	4143	5568	5369	5531
Calm4	NM_020036.4	Endogenous	mRNA	Mm	GCTGTGTTCAATGTCCTTGACCAGAATGGTGATGGCTACATCACTGTGGATGAGCTCAAGGAAAGCTTGTCCAAGTTAGGCGAGTCCCTTTCCCAGGAGG	FALSE	1	1	2	1	2	1	2	3	1	1	1	1
Camk2b	NM_001174053.1	Endogenous	mRNA	Mm	TAGGGTGTTTGTCCACTCAGCTTGGAGCCTGGGTGTTCGAGACTTGGTTAAATGTTGCAGAATGTGGTAAAGAGGGGCCAGAAGTTGGGTTCTAGACTTC	FALSE	452	431	510	525	432	352	236	402	329	444	455	543
Camk2d	NM_001025439.1	Endogenous	mRNA	Mm	CAGGCAGGAGACTGTAGACTGCTTGAAGAAATTTAATGCTAGACGGAAACTGAAGGGCGCCATCTTGACAACTATGCTGGCTACGAGAAATTTTTCAGCA	FALSE	493	376	460	436	357	331	218	346	292	413	465	427
Camk2g	NM_001039138.1	Endogenous	mRNA	Mm	TTCCTGTTGGTTTTCCTGACATAACAAGGAGAGATCCAGAAGTCGTTGGCCAGGGCTCCTTTTGCCACTTTTGGCAGTTGTTTGTGTGCTGATCTGGACC	FALSE	952	828	768	1042	693	659	464	743	643	943	789	986
Camk4	NM_009793.3	Endogenous	mRNA	Mm	GTTTCTCCAGGCTGTTAGAGTGTCAGCACTTCAGCAGGTCAAGCACAAACCTCTGACAGCTTTTGGGGAAGGAGACAGTGTGGTGCTTTGAGCATTTTGT	FALSE	483	412	366	488	302	371	236	354	334	399	442	475
Car2	NM_009801.4	Endogenous	mRNA	Mm	TGCCCAGCATGACCCTGCCCTACAGCCTCTGCTCATATCTTATGATAAAGCTGCGTCCAAGAGCATTGTCAACAACGGCCACTCCTTTAACGTTGAGTTT	FALSE	1233	1278	1205	1336	1054	947	611	871	959	1167	959	1338
Casp1	NM_009807.2	Endogenous	mRNA	Mm	GACAATAAATGGATTGTTGGATGAACTTTTAGAGAAGAGAGTGCTGAATCAGGAAGAAATGGATAAAATAAAACTTGCAAACATTACTGCTATGGACAAG	FALSE	27	17	22	34	11	20	10	17	13	28	31	27
Casp3	NM_009810.2	Endogenous	mRNA	Mm	GAGGCTGACTTCCTGTATGCTTACTCTACAGCACCTGGTTACTATTCCTGGAGAAATTCAAAGGACGGGTCGTGGTTCATCCAGTCCCTTTGCAGCATGC	FALSE	52	49	46	69	39	47	35	33	29	51	54	53
Casp6	NM_009811.3	Endogenous	mRNA	Mm	CAAGCCACATAGATGCCGATTGCTTCATCTGTGTCTTCCTGAGCCATGGGGAAGGCAACCACGTTTACGCATACGACGCCAAAATTGAAATTCAGACGTT	FALSE	34	28	29	56	33	33	13	25	23	25	36	24
Casp7	NM_007611.2	Endogenous	mRNA	Mm	TGGTTGTTCTCAGTGGCTTAGGGCAGATTTTTAAGCCGACCTTCCCAGGTGGCTGAGAGAAGACGACAGTTAATATTCCAGTATATAGAACCCAATCCAG	FALSE	15	14	5	13	8	13	5	13	14	7	10	18
Casp8	NM_009812.2	Endogenous	mRNA	Mm	TTTCATTCAGGCTTGCCAAGGAAGTAACTTCCAGAAAGGAGTGCCTGATGAGGCAGGCTTCGAGCAACAGAACCACACTTTAGAAGTGGATTCATCATCT	FALSE	13	13	5	8	5	5	7	10	8	8	15	10
Casp9	NM_015733.4	Endogenous	mRNA	Mm	ATAACTGTCCTGCTAAGATAGGATTTTGAACTGGGGCAGGCTGCTCTTTCCCTTTGGCGATGCAAACATGCTCCTAGCAGCTTTCAGGTTGTAGGGCAAT	FALSE	72	54	47	57	40	53	40	47	32	51	60	60
Cast	NM_009817.1	Endogenous	mRNA	Mm	ATTTCTGAAGTAGTTTCTCAGACACCTGCTCCAAGCACCCATGCAGCAGCTCCACTGCCTGGCACTGAGCAGAAAGACAAAGAACTTGATGATGCCTTGG	FALSE	71	55	54	74	46	62	37	49	50	58	58	54
Cck	NM_031161.2	Endogenous	mRNA	Mm	GGACTACATGGGCTGGATGGATTTTGGCCGGCGCAGTGCCGAGGACTACGAATACCCATCGTAGTGGGCCAGCGTCTTGGCCCTGCTTGGAGGAGGTGGA	FALSE	897	936	994	1099	844	658	553	848	658	910	933	1045
Ccl12	NM_011331.2	Endogenous	mRNA	Mm	CAGAAGATTCACGTCCGGAAGCTGAAGAGCTACAGGAGAATCACAAGCAGCCAGTGTCCCCGGGAAGCTGTGATCTTCAGGACCATACTGGATAAGGAGA	FALSE	8	1	2	10	11	23	9	12	5	6	4	6
Ccl5	NM_013653.1	Endogenous	mRNA	Mm	CCTCGTGCCCACGTCAAGGAGTATTTCTACACCAGCAGCAAGTGCTCCAATCTTGCAGTCGTGTTTGTCACTCGAAGGAACCGCCAAGTGTGTGCCAACC	FALSE	6	2	5	2	6	10	4	1	1	2	1	3
Ccnd1	NM_007631.1	Endogenous	mRNA	Mm	GGAGGGGTTCTAATGGAATGGATGGGGATGTCCACACACGCATTCAGATGGCTGTACAACAGGTTGTAGGGCTGGTAGTATGAGGTGCTTGGGAAGTTTT	FALSE	86	110	102	135	88	116	47	102	98	90	88	96
Ccnh	NM_023243.2	Endogenous	mRNA	Mm	GACTATGTGTCAAAGAAACCCAAACAGGAAGAGGAGGAATGGACTGATGACGACCTGGTAGATTCTCTCTAACCATAATAAATGACCGCAGCAGTACTTA	FALSE	407	408	392	474	329	274	224	307	260	395	371	415
Ccr2	NM_009915.2	Endogenous	mRNA	Mm	ATGAACTAACATAGACAGCTCAGGATTAACAGGGACTTGTGGTTTGTGGTCTGTGGGCTTATCCAAGCATGGTGATTTAGACTCTAAGGTCCGTCTGGAT	FALSE	10	9	9	17	8	8	6	9	2	2	8	6
Ccr5	NM_009917.5	Endogenous	mRNA	Mm	GGAGCAGGGAGAACGAGTCTTTTATCAGGGCCGGGAAATATGCACAAAGAGACTTGAGGCAGGTGCCATGACCCATATGCAAAGGGACGGACACAGGGCC	FALSE	8	12	13	15	15	12	10	12	7	7	13	11
Ccs	XM_006531645.1	Endogenous	mRNA	Mm	GTGCACAAGACCCTGAAAGGGGTGGCAGGTGTCCAGAATGTGGACGTTCAGTTGGAGAACCAGATGGTGTTGGTGCAGACGACTCTGCCCAGCCAGGAGG	FALSE	85	80	73	95	55	55	37	73	55	69	71	80
Cd14	NM_009841.3	Endogenous	mRNA	Mm	CTAGACGAGGAAAGTTGTTCCTGCAACTTCTCAGATCCGAAGCCAGATTGGTCCAGCGCTTTCAATTGTTTGGGGGCGGCAGATGTGGAATTGTACGGCG	FALSE	3	5	5	8	8	13	3	8	4	2	4	4
Cd33	NM_001111058.1	Endogenous	mRNA	Mm	ATGACACAGGAATGTACTTCTTCAGAGTGGTCAGAGAACCTTTTGTGAGATATTCTTACAAAAAAAGCCAGCTGTCACTGCATGTGACCTCTCTATCACG	FALSE	18	21	16	44	17	20	13	22	24	25	23	29
Cd34	NM_001111059.1	Endogenous	mRNA	Mm	CTGATTATTCGCCTAATAATAGCAGCTTTGAGATGACATCACCCACCGAGCCATATGCTTACACATCATCTTCTGCTCCGAGTGCCATTAAGGGAGAAAT	FALSE	685	664	647	849	579	569	415	583	445	603	728	775
Cd4	NM_013488.2	Endogenous	mRNA	Mm	AAGAGGTGTCCGTACAAAAGTCCACCAAAGACCTCAAGCTCCAGCTGAAGGAAACGCTCCCACTCACCCTCAAGATACCCCAGGTCTCGCTTCAGTTTGC	FALSE	1	8	1	3	6	1	4	2	1	4	3	5
Cd40	NM_011611.2	Endogenous	mRNA	Mm	GCTGCCCAAACCCGGTTACCTGATTTTGATCCCTGGGACTTCATGGTAAAAGGGAGAGAACCAAATCCAGAGGGTTGTCATTTGACCTCCATGTGTGCTC	FALSE	1	4	6	5	3	3	1	2	4	3	6	2
Cd44	NM_009851.2	Endogenous	mRNA	Mm	CATATTGCCTCTCCAGCAGTCCAATCCTTAGGCATTGCTTTCCAGCGGGGTGGGAGATCAGGTGTACTGGTTACATACTCTCTTTATAGACTCCCTTCTG	FALSE	21	14	6	24	16	21	7	9	21	12	20	5
Cd68	NM_009853.1	Endogenous	mRNA	Mm	AGCCCGAGTACAGTCTACCTGGACTACATGGCGGTGGAATACAATGTGTCCTTCCCACAGGCAGCACAGTGGACATTCATGGCGCAGAATTCATCTCTTC	FALSE	36	46	45	92	60	72	39	62	64	45	34	47
Cd8a	NM_001081110.2	Endogenous	mRNA	Mm	CCACCTTCGTTGTCTATATGGCTTCATCCCACAACAAGATAACGTGGGACGAGAAGCTGAATTCGTCGAAACTGTTTTCTGCCATGAGGGACACGAATAA	FALSE	13	8	2	1	5	4	4	3	3	10	1	5
Cd9	NM_007657.3	Endogenous	mRNA	Mm	CAGCTTTTGGAAAGTTTCCAGGTTAAGCCCTGCCCTGAAGCCATCAGTGAGGTCTTCAACAACAAGTTCCACATCATTGGAGCAGTGGGTATCGGCATCG	FALSE	251	263	260	480	370	348	220	294	248	262	211	247
Cdc27	NM_145436.2	Endogenous	mRNA	Mm	CCAAGGAACATAGCTTACCTTAAGCTTGGAGTCTCTCCTATAAGCAAATGCAGTGGGCCTGTTCGGACTCATACGGAGGAGTCAAATATCCCTCCATACA	FALSE	129	117	89	116	109	97	64	100	70	107	115	130
Cdc40	NM_027879.2	Endogenous	mRNA	Mm	GGTAGACTTCTCACCAGACATGAGCTATGTGATTTCAGGAGATGGAAATGGGAAATTAAACATCTGGGACTGGAAGACCACAAAACTCTACAGTCGCTTT	FALSE	253	229	231	280	226	185	112	238	162	230	211	276
Cdk2	NM_016756.4	Endogenous	mRNA	Mm	TCCCTGGAGATTCTGAGATTGACCAACTCTTCCGGATCTTTCGGACTCTGGGGACCCCAGATGAGGTGGTTTGGCCAGGAGTTACTTCTATGCCTGATTA	FALSE	10	13	10	9	7	10	3	7	4	6	2	11
Cdk5	NM_007668.3	Endogenous	mRNA	Mm	GGAAGGCACCTATGGAACTGTGTTCAAGGCTAAAAACCGGGAAACTCATGAGATTGTGGCTCTGAAGCGTGTCAGGCTGGATGATGACGATGAGGGTGTG	FALSE	198	156	194	203	166	154	100	163	132	178	187	217
Cdk5r1	NM_009871.2	Endogenous	mRNA	Mm	TTTTGAGAAGGTGCATATTTCAGAAGTGGTCGGCAACTGAGGAAAGAGCTTCCTTGGTTCCATTGTGAAGCCCGTGTCCTCTCTGCTTGCGCTGGCTCTC	FALSE	938	895	776	1002	709	672	511	797	696	916	896	1041
Cdk5rap3	NM_030248.1	Endogenous	mRNA	Mm	GAGATTGCCCAGCTGCTCTCTGGATCCTACATTCATTACTTCCACTGCCTAAGAATAGTGGACCTTCTTAAAGGCACCGAGGCGTCCACCAAAAATATTT	FALSE	91	87	82	93	77	82	47	80	89	96	85	102
Cdk7	NM_009874.3	Endogenous	mRNA	Mm	GCAGCCAGTGCCTAATTACTGAGTCCTCTCCCACTGCACATGAACTTTCTGTATGGAACCTTTGGGTGAGCAAAACCTCACTCCTATTCTGCATTCTCCT	FALSE	133	112	132	148	100	79	56	87	97	125	134	129
Cdkn1a	NM_007669.4	Endogenous	mRNA	Mm	AATACCGTGGGTGTCAAAGCACTTAGTGGGTCTGACTCCAGCCCCAAACATCCCTGTTTCTGTAACATCCTGGTCTGGACTGTCTACCCTTAGCCCGCAC	FALSE	77	80	116	106	69	78	39	79	82	98	110	75
Cds1	NM_173370.3	Endogenous	mRNA	Mm	TCAGAGTAGCAGTCATCTGCCAAGTGTTAACGCCCTGGTGTTAAGGAGTTTCAAAATCAGAAGCTAGAGGCTGGTGCTTAGACCACTGTTGATTTGTTGA	FALSE	527	495	497	625	399	342	301	447	385	503	469	536
Cers1	NM_138647.3	Endogenous	mRNA	Mm	GGCCTGTTGGAGCTACTGCGCTTACCTGCTCCTGGGCACCAGTTATCCTTTCTTCCATGACCCGCCCTCTGTCTTCTATGACTGGAGGTCAGGCATGGCA	FALSE	22	28	35	35	21	23	15	26	11	21	28	29
Cers2	NM_029789.1	Endogenous	mRNA	Mm	AAAGGAGGCTTGGCCACATCCACATCCTGTTGAGAGACATAGTCTCATTTCCCTCTCTACCTTCTAAGCTACCCTTCTTGCTAATCCTTCTTCAGCTCTG	FALSE	141	145	139	178	139	135	81	131	104	147	143	159
Cers4	NM_026058.4	Endogenous	mRNA	Mm	CCTCAAGGTAGGAAGAAGACTGATGATCTGTTTCCCTTCTGTTCCTCTCCCTTTATCCTTTTGAGCAGCTTGACAGAACCTGGGGGAGCAGTGGACTCTG	FALSE	32	26	35	44	32	29	14	25	20	32	20	34
Cers6	NM_172856.3	Endogenous	mRNA	Mm	CAAAAGGAAGGACTTCGGCATTATGTTCCTGCACCACCTTGCAACAATTTTCTTAATAACCTTTTCATATGTCAACAACATGGCCCGAGTAGGAACCCTG	FALSE	144	106	133	142	119	102	84	116	108	103	137	120
Chat	NM_009891.2	Endogenous	mRNA	Mm	TTGGGTCTCTGAATACTGGCTGAATGACATGTATCTAAACAACCGCCTGGCCCTGCCAGTCAACTCTAGCCCTGCTGTGATCTTTGCTCGGCAGCACTTC	FALSE	5	8	12	8	3	6	3	5	5	6	14	8
Chd4	NM_145979.2	Endogenous	mRNA	Mm	ACGACGATTTAGATGTAGAGTCTGACTTCGACGATGCCAGTATCAACAGCTATTCTGTTTCGGATGGTTCCACCAGCCGCAGTAGTCGGAGCCGTAAGAA	FALSE	195	157	202	196	177	154	86	152	182	169	174	212
Chl1	NM_007697.2	Endogenous	mRNA	Mm	TGTGCTTGAACTATACTGCGAAAGCCAGTGTGACTCACATTTGAAACACAGTTTGAAGTTGTCCTGGAGTAAAGATGGAGAAGCTTTTGAGATGAATGGC	FALSE	303	255	271	337	298	203	171	261	184	267	299	322
Chmp2b	NM_026879.2	Endogenous	mRNA	Mm	AAGACCATGAGTGAACAGTTATTTCCTGACCCATGGCTACTTTGAATCCTTTGCCAAAGAGTGCCAATGATGCAAAAAACAATGGGAGCAGTTTGGCTCT	FALSE	166	198	146	173	139	139	90	152	117	171	187	168
Chrm5	NM_205783.2	Endogenous	mRNA	Mm	AAGTGTGTTGCCTATAAGTTCCGATTGGTGGTAAAAGCTGACGGGACCCAGGAGACAAACAATGGCTGTCGTAAGGTGAAAATCATGCCCTGTTCCTTCC	FALSE	1	1	2	2	1	2	1	2	1	1	1	3
Chrna7	NM_007390.3	Endogenous	mRNA	Mm	GGAGTGAAAAATGTTCGTTTTCCAGATGGCCAGATTTGGAAACCAGACATTCTCCTCTATAACAGTGCAGATGAACGCTTTGATGCCACATTCCACACCA	FALSE	106	101	120	151	114	71	66	92	80	107	99	112
Chrnb2	NM_009602.4	Endogenous	mRNA	Mm	AGGAAACCATCTATCTTTAAATTTGAGGGCCAGGGATCAACGGAATCCACTTGTACGTGATGCCAATTTATCCTGAGCAACACTTCTAGCCCACAAAGCT	FALSE	169	147	141	190	126	141	82	124	117	181	188	184
Cldn15	NM_021719.4	Endogenous	mRNA	Mm	TGCATGAATAAATGTATATTGTGATTGTTCAGGGGGCACCAGGGGTCATGGAGTCACAGCCACATAAGGGAGTCCTTTTCAAACCACAGACTGTCAAGTC	FALSE	6	2	7	3	3	1	2	3	1	4	3	1
Cldn5	NM_013805.4	Endogenous	mRNA	Mm	CCCTGCTCAGAACAGACTACAGGCACTTTTAAGAACTTGACCGACCTTTTCTTCTATGCGCAGTTGGCCACGACGTGGGTGGAACGCTCAGATTTCATCG	FALSE	151	151	125	119	143	257	75	157	122	94	135	143
Cln3	NM_001146311.1	Endogenous	mRNA	Mm	CCTCGGTTGGATAGTCGGAGTGTCCTTTGGAAGAATGCAGTGGGTTTCTGGATCTTGGGTCTTTGCAACAATTTCTCATATGTGGTGATGCTGAGCGCTG	FALSE	59	69	54	75	45	45	26	51	38	58	45	59
Cln8	NM_012000.3	Endogenous	mRNA	Mm	AAGATTCGGTCGACTCTAGCGGTTGCTGGCTTTGTCTTCTACCTGGGCGTCTTTGTAGTCTGCCATCAGCTCTCATCGTCCCTGAATGCCACCTACCGCT	FALSE	98	109	103	126	103	80	56	91	79	106	108	109
Clu	NM_013492.2	Endogenous	mRNA	Mm	TTAATAAGGAGATTCAGAACGCCGTCCAGGGAGTGAAGCACATAAAAACTCTCATAGAAAAAACCAACGCAGAGCGCAAGTCCTTGCTCAACAGTTTAGA	FALSE	6448	6577	5991	7176	5091	6197	3247	4591	5253	5487	5506	5820
Cnksr2	NM_177751.2	Endogenous	mRNA	Mm	TACCAAATGACTTTTTGACCTCAGTTGTGGATCTGATTGGAGCAGCCAAGAGTCTTCTTGCTTGGTTGGACAGGTCACCATTTGCTGCTGTGACAGACTA	FALSE	3227	3250	2963	3265	2515	2302	1509	2404	2196	2741	2881	2972
Cnr1	NM_007726.3	Endogenous	mRNA	Mm	AGTGAAGAAAGTCTATCGCTGCAGTTGCTCGGCGATCCTTCAAAGTCTCTGAAATAGAAGGGAAAACGTTGGCTTCCAAATCTGAAGCCTAACTACCCAT	FALSE	332	328	279	346	260	246	160	273	217	291	352	345
Cntf	NM_170786.2	Endogenous	mRNA	Mm	ATGGGGGTGCACAATCCCATTAGAGAATGCCCAGTAGATTTAGTCTGTGGGAGTCACATTTCTTATTTGGACTAGTGAAGACAGAAGCAAACCAGCTCAC	FALSE	8	17	9	12	10	6	6	15	5	13	15	14
Cntn1	NM_001159647.1	Endogenous	mRNA	Mm	TTCCTGAACGAACAACAAAGCCATATCCTGCTGATATTGTGGTGCAGTTCAAGGACATATACACCATGATGGGCCAAAATGTGACTTTAGAGTGTTTCGC	FALSE	2385	2029	2011	2486	1743	1675	1063	1725	1539	2148	2036	2227
Cntn4	NM_001109751.1	Endogenous	mRNA	Mm	GTTGCCATGGGAACTGCTAGTGCTGCAATCATTCATGTTGTGCCTTGCAGATGACTACACACTGCATGGCCCAGTTTTTGTTCAAGAACCAAGTCATGTC	FALSE	280	298	306	351	296	175	154	269	196	291	237	296
Cntnap1	NM_016782.2	Endogenous	mRNA	Mm	GTGGCTGCATAGAAAACGTGATCTACAACCGGATCAACATTGCAGAAATGGCAGTGATGCGCCATTCGCGGATCACCTTTGAGGGTAATGTGGCTTTCCG	FALSE	452	407	391	526	433	411	225	381	326	425	382	415
Cntnap2	NM_001004357.2	Endogenous	mRNA	Mm	GCTATAAGAAATGGAGTCAACAGAAACTCAGCTATCATTGGAGGGGTCATCGCTGTGGTGATTTTCACCATCCTCTGCACCCTGGTCTTCCTCATCCGGT	FALSE	103	105	104	124	104	85	40	97	81	112	97	133
Col4a1	NM_009931.2	Endogenous	mRNA	Mm	CTCCAGGGATCACAGGTTCAAAGGGAGATATGGGACTGCCCGGAGTTCCAGGATTTCAAGGTCAGAAAGGGCTTCCTGGTCTGCAGGGAGTGAAAGGAGA	FALSE	22	30	28	30	36	64	21	33	22	20	32	17
Col4a2	NM_009932.3	Endogenous	mRNA	Mm	TTGTGGCAAACCTCCTGCCTCAGCTTCCCAGATGCTGGGATTATGGGCATGCGCCACCACACCCAGCTTGGTGCTTACTCTTAACTTATTACCTCAGATG	FALSE	38	37	38	39	26	36	24	26	30	46	63	39
Comt	NM_007744.3	Endogenous	mRNA	Mm	AAAGGCCAAATCATGGATGCAGTGATTCGGGAGTACAGGCCCTCGCTGGTGCTGGAGCTAGGAGCTTATTGTGGCTACTCAGCCGTGCGAATGGCCCGCC	FALSE	240	239	257	302	210	194	109	183	183	242	226	261
Cp	NM_001042611.1	Endogenous	mRNA	Mm	AGAAACCTTTACATACGAATGGACTGTCCCCAAAGAAATGGGACCCACTTATGCAGATCCTGTGTGCCTATCTAAGATGTACTACTCTGGCGTTGACCCC	FALSE	35	27	30	37	30	69	23	43	26	25	27	24
Cplx1	NM_007756.3	Endogenous	mRNA	Mm	AGGCACTGCGGCAGGCAGAGGAGGAGCGCAAAGCAAAGTACGCCAAGATGGAGGCAGAACGTGAGGTCATGCGGCAGGGTATAAGAGACAAGTATGGCAT	FALSE	660	572	733	648	603	573	306	542	432	607	597	704
Cpt1b	NM_009948.2	Endogenous	mRNA	Mm	ATGATCATGTATCGCCGCAAACTGGACCGTGAAGAGATCAAGCCGGTCATGGCACTGGGTATGGTGCCCATGTGCTCCTACCAGATGGAGAGGATGTTCA	FALSE	3	8	6	6	8	7	5	2	5	11	7	7
Creb1	NM_001037726.1	Endogenous	mRNA	Mm	TTCTGTCTGGACAGTTCACCAGATTCTCCAGAAGGCTTTCAAACGGCTAAAGTTTGATCTTTGTCCTGCTGAGCTTGCTGGGAAGGAGATAGCATAAAAG	FALSE	76	71	77	77	39	52	42	74	61	72	73	77
Crebbp	NM_001025432.1	Endogenous	mRNA	Mm	TTGGATATTGCTGTGGACGAAAGTATGAGTTCTCCCCACAGACTTTGTGCTGTTACGGAAAGCAGCTGTGTACAATTCCTCGTGATGCAGCCTACTACAG	FALSE	722	678	743	733	540	571	312	590	523	641	679	684
Crh	NM_205769.1	Endogenous	mRNA	Mm	AAGCAGATGGGAGTCATCCAGTTGTTTTTATTTGGAGCTGCAGTGGAAGAGAATTCATTCTTGAGGGGTGGCTAGGACGAAATGTGTAAGCTCTTTGAAT	FALSE	20	24	17	30	16	19	8	16	19	25	13	23
Crtc2	NM_028881.2	Endogenous	mRNA	Mm	GCTGCCCAAACAGTTTTCGCCAACAATGTCACCCACCTTGTCTTCCATCACTCAGGGCGTTCCCTTGGATACCAGTAAATTGCCTACTGACCAGCGATTG	FALSE	10	12	15	11	7	12	7	11	11	4	13	16
Csf1	NM_001113530.1	Endogenous	mRNA	Mm	TCCAGCTGCTGGAGAAGATCAAGAACTTCTTTAATGAAACAAAGAATCTCCTTGAAAAGGACTGGAACATTTTTACCAAGAACTGCAACAACAGCTTTGC	FALSE	83	94	83	135	77	85	46	70	76	88	84	75
Csf1r	NM_001037859.1	Endogenous	mRNA	Mm	CCACCACTCTTGACCTTCACTCTGTCTATAGTCCCGCCTCATCCTGGATCTTGTACTGAGCGGCAGCTAAAAGTGTTCTACCCAGTGCCCTGTCACTCTA	FALSE	259	247	211	338	242	342	152	217	209	223	221	222
Csf2rb	NM_007780.4	Endogenous	mRNA	Mm	ATTGCGTGTCTGCATTGCTATGAGATGGGTTGCCGAGCCACACCTGTCTTTGGGTCCCTGTTTGCAGGGGTCTTTGCTGTAAGTGCACACGTGCCTTTGT	FALSE	4	3	2	7	3	6	4	7	5	2	3	1
Cspg4	NM_139001.2	Endogenous	mRNA	Mm	TGGAGCTAGACATCCTGGGAGCCCAAACCCGGAAAATGTTTACCCTGTTGGACGTGGTGAACCGTAAGGCCCGCTTTGTTCACGATGGCTCTGAAGACAC	FALSE	27	30	43	38	31	33	22	33	18	29	34	34
Ctnnb1	NM_007614.2	Endogenous	mRNA	Mm	TTGGTCGAGGAGTAACAATACAAATGGATTTGGGGAGTGACTCACGCAGTGAAGAATGCACACGAATGGATCACAAGATGGCGTTATCAAACCCTAGCCT	FALSE	684	715	634	728	478	575	333	502	477	682	669	700
Ctns	NM_031251.4	Endogenous	mRNA	Mm	CATTCTATATAACGCTGCTCTAGTAACTGCAGAACAAGAGGCCCAGGCCAGTGCCTGGTAAAGTATATTTCTGATCCCTGAGGTGCCTGCCAGATTGGTC	FALSE	22	30	30	36	25	22	16	10	16	33	29	33
Ctse	NM_007799.3	Endogenous	mRNA	Mm	AGAATATGCAGTGGATTGTGCCACTCTCGACACGATGCCAAACGTTACCTTCCTCATCAACGAGGTTTCATATACCCTCAACCCAACTGACTACATCCTG	FALSE	1	1	1	5	1	5	1	1	1	1	2	2
Cul1	NM_012042.3	Endogenous	mRNA	Mm	TGATTAGTGGAGTTGTACAATCTTATGTGGAATTGGGGCTGAATGAAGATGATGCATTTGCAAAGGGCCCTACGTTAACAGTGTATAAAGAATCCTTTGA	FALSE	657	663	646	724	577	556	322	553	480	653	647	651
Cul2	NM_029402.3	Endogenous	mRNA	Mm	TGGCAGCCCCTGTTTTTCTGCTGTTTACAACATCACCAGTGCCACGTCATGAGCGTCAGAGAAAATGCCTAGAGATATTTCAAGCTCATGTCATTATGAC	FALSE	493	390	390	469	310	319	231	373	288	382	432	426
Cul3	NM_016716.4	Endogenous	mRNA	Mm	CTCAGTCAGCCACACCAAAGTGCAACATCCCACCAGCACCAAGACATGCTTTTGAGATATTTAGAAGGTTCTACTTAGCCAAACACAGTGGTCGACAGCT	FALSE	394	321	323	390	272	284	161	311	241	330	300	348
Cx3cl1	NM_009142.3	Endogenous	mRNA	Mm	CGTTCTTCCATTTGTGTACTCTGCTGCCGGGTCAGCACCTCGGCATGACGAAATGCGAAATCATGTGCGACAAGATGACCTCACGAATCCCAGTGGCTTT	FALSE	1730	1610	2197	1863	1648	1088	853	1540	1244	1782	1570	1773
Cx3cr1	NM_009987.3	Endogenous	mRNA	Mm	TCCTGTGTTGGTTGTGATAACCATTTCAGAAGTCTCTCCCAGCCTGTTGCTCACGGCGGCATGTCTGATATCTCCTTGGCAGTCTGTATGTTTGTGTCGA	FALSE	241	287	194	335	228	291	212	190	227	217	212	268
Cxcl10	NM_021274.1	Endogenous	mRNA	Mm	AGGACGGTCCGCTGCAACTGCATCCATATCGATGACGGGCCAGTGAGAATGAGGGCCATAGGGAAGCTTGAAATCATCCCTGCGAGCCTATCCTGCCCAC	FALSE	17	17	5	25	19	20	19	10	7	8	5	9
Cxcl11	NM_019494.1	Endogenous	mRNA	Mm	TTAAGGCGTCAAAACATGTGACATCCTGGGAACGTCTGACTGTGAGCCCTCCAATAAGAACTCTGTGCCAGGAACCTGACCCTCTGCTGTCTTGGAACAT	FALSE	7	3	7	6	2	4	1	3	4	4	7	8
Cxcl12	NM_021704.3	Endogenous	mRNA	Mm	CTGAAAATCCTCAACACTCCAAACTGTGCCCTTCAGATTGTTGCACGGCTGAAGAACAACAACAGACAAGTGTGCATTGACCCGAAATTAAAGTGGATCC	FALSE	518	422	439	411	469	643	225	412	360	363	332	428
Cxcl16	NM_023158.6	Endogenous	mRNA	Mm	CGCAGGGTACTTTGGATCACATCCGAAAATACCTGAAAGCATTTCATCGTTGTCCATTCTTTATCAGGTTCCAGTTGCAGTCCAAAAGCGTGTGTGGGGG	FALSE	12	21	22	39	20	42	22	16	21	19	24	22
Cxcr4	NM_009911.3	Endogenous	mRNA	Mm	GTTTCAATTCCAGCATATAATGGTGGGTCTCGTCCTGCCCGGCATCGTCATCCTCTCCTGTTACTGCATCATCATCTCTAAGCTGTCACACTCCAAGGGC	FALSE	1	3	1	1	3	2	1	2	6	4	3	3
Cxxc1	NM_028868.3	Endogenous	mRNA	Mm	GCATCCCATCAACCCACGAGTTGCCTTGCGTCACATGGAACGTTGCTATGCTAAGTATGAGAGCCAGACGTCTTTTGGGTCCATGTACCCCACACGCATC	FALSE	21	20	29	23	18	17	13	24	16	23	22	25
Cybb	NM_007807.2	Endogenous	mRNA	Mm	ACAGAAGACTCTGTATGGACGGCCCAACTGGGATAACGAGTTCAAGACCATTGCAAGTGAACACCCTAACACCACAATAGGCGTTTTCCTGTGTGGCCCT	FALSE	7	4	12	14	10	32	13	6	11	7	9	8
Cycs	NM_007808.4	Endogenous	mRNA	Mm	CCTGTGAGATGCAGAAAGGGGACAGTCTCTGTACACTGATTTTACAAGTCAGGAAGTGGGACCACTCTAGCTGATCTGCTTGCTCTTAGTTGCTTTGTAG	FALSE	13	19	16	20	11	11	11	16	6	11	9	23
Cyp4x1	NM_001003947.1	Endogenous	mRNA	Mm	CTGGACATAATAATGAAATGTGCTTTTGGCCAGGAGACCAACTGCCAGATAAACGGCACCTATGAGTCTTACGTGAAGGCAACATTTGAACTTGGTGAAA	FALSE	78	75	57	100	60	49	48	52	47	57	56	85
Dagla	NM_198114.2	Endogenous	mRNA	Mm	CGCCGTCTAAAAGTGTTCCTCTGTTGCACCCGGACAAAGGATTCCCAGTCAGATGCCTACTCAGAAATCGCCTACCTCTTTGCTGAATTTTTCCGTGACC	FALSE	288	319	364	339	291	228	160	310	248	337	289	355
Dbh	NM_138942.3	Endogenous	mRNA	Mm	GCAAGGGCTGAGGGCTGGGGTCCTGTTTGGAATGTCAGATCGAGGAGAGATGGAGAACGCAGATCTCATCATGCTCTGGACTGATGGGGACAGGGCCTAC	FALSE	3	2	5	2	1	1	6	1	1	2	2	3
Dcx	NM_010025.2	Endogenous	mRNA	Mm	GAGTGATACAAAGGCAGTGTTTCAACAAGACACTCTCTTCTTTGGTTTGCTGTTCTCTCTTGGACTGGAATGTTTGGCAAGGCCCATGTAAACTGGTTAG	FALSE	79	79	59	94	62	38	38	62	57	82	78	76
Ddc	NM_016672.4	Endogenous	mRNA	Mm	TAAACAGCGCCAAAAAAATCCACTTGGTTCCATGTCGTCTCCGAGACAAGTTTGTGCTACGCTTTGCTGTGTGCGCTCGCACTGTGGAGTCTGCCCACGT	FALSE	13	15	14	21	11	11	10	13	5	15	19	9
Ddit3	NM_007837.3	Endogenous	mRNA	Mm	CCTCAGATGAAATTGGGGGCACCTATATCTCATCCCCAGGAAACGAAGAGGAAGAATCAAAAACCTTCACTACTCTTGACCCTGCGTCCCTAGCTTGGCT	FALSE	174	170	173	199	124	155	69	140	97	170	170	192
Ddx23	NM_001080981.1	Endogenous	mRNA	Mm	ATTTGCATTGTCCAACCTCAAGGCTGGAGCCAAGGATATTTTGGTGGCTACAGATGTGGCTGGCCGTGGTATTGATATCCAAGATGTGTCTATGGTTGTC	FALSE	279	257	234	277	190	225	124	211	174	250	249	255
Des	NM_010043.1	Endogenous	mRNA	Mm	CCCGCTGAGCTCTCCCGTGTTCCCTCGAGCAGGCTTCGGTACCAAGGGCTCCTCGAGTTCAATGACATCCCGCGTGTACCAGGTGTCGCGCACGTCGGGC	FALSE	5	10	8	7	3	8	1	5	3	1	1	5
Dgkb	NM_178681.4	Endogenous	mRNA	Mm	AATCCTCGTCAGGTTTACAGTCTTTCTGGAAATGGACCAATGCCAGGGTTACACTTTTTTCGCGATGTCCCTGACTTCAGAGTGTTAGCATGCGGTGGAG	FALSE	560	639	614	681	476	466	327	472	467	530	541	615
Dgke	NM_019505.3	Endogenous	mRNA	Mm	CATGCGAGGCAGCTTAAGGAGCGAAAAGTGTGACTTTGGAGAATTCAGAAACCTCATCATCCCGCCAAGCTACTTAACTTCTATTAACCAGATGCGTAAA	FALSE	158	147	161	227	134	119	113	141	112	166	198	198
Dlat	NM_145614.4	Endogenous	mRNA	Mm	CTCAGGCATGTATTCTGGCAATCGGTGCTTCAGAGGATAAACTGATCCCAGCAGATAATGAGAAAGGCTTTGATGTGGCTAGTGTGATGTCCGTTACACT	FALSE	564	572	532	610	450	384	276	511	416	554	597	631
Dld	NM_007861.4	Endogenous	mRNA	Mm	GAGGATATGTTGCTGCCATCAAATCTGCCCAGTTAGGCTTTAAGACAGTCTGCATTGAGAAAAATGAGACACTAGGTGGAACATGCTTGAACGTTGGTTG	FALSE	602	580	522	639	480	420	313	432	387	532	495	574
Dlg3	NM_001177778.1	Endogenous	mRNA	Mm	AAAGAGACTGCAGCAAGCACAACTTTATCCCATTGCCATTTTCATCAAGCCCAAGTCCATTGAAGCACTTATGGAAATGAACCGACGGCAGACATACGAA	FALSE	922	860	828	990	729	586	449	784	624	785	856	870
Dlg4	NM_001109752.1	Endogenous	mRNA	Mm	CTGAGCTATGAGACGGTGACGCAGATGGAAGTGCACTACGCTCGCCCCATCATCATCCTTGGGCCTACCAAAGACCGTGCCAACGATGATCTTCTCTCCG	FALSE	1391	1558	1564	1577	1222	1292	723	1466	1230	1499	1375	1432
Dlgap1	NM_027712.3	Endogenous	mRNA	Mm	GCCACAGCTATGTGCGGGCCATCGAAAAGGGCTGCTCCCAGGACGACGAATGCGTGTCGCTGCGGTCGTCCTCCCCTCCACGCACAACCACCACCGTGAG	FALSE	296	307	310	356	225	239	145	226	216	281	269	310
Dll4	NM_019454.2	Endogenous	mRNA	Mm	TGGCAATGTCTCCACGCCGGTATTGGGCACCAACTCCTTCGTCGTCAGGGACAAGAATAGCGGCAGTGGTCGCAACCCTCTGCAGTTGCCCTTCAATTTC	FALSE	7	3	3	3	4	3	4	4	3	3	4	5
Dlx1	NM_010053.1	Endogenous	mRNA	Mm	CTTAAACACACCAGAAGAGGGAACAAGGACAGGAAAGTGACTTTTAAGGTGCACAGTAACTTTTGTACTTGGCTGAAATGCAGAAAGGGAAAACAGGATG	FALSE	34	41	48	58	26	48	27	19	25	32	38	54
Dlx2	NM_010054.2	Endogenous	mRNA	Mm	ATGGGGGAGAATTCCCAGCTCTCCCAACTCTTCCCGCCTCCCACTTTCCCCAGGAACACTCCCGTAGCTCCTTCATCCATTGCCAGTGGAGGGTTTTTAT	FALSE	7	7	7	8	5	5	1	5	4	5	5	7
Dnah1	NM_001033668.1	Endogenous	mRNA	Mm	AGCCCTACGAGGAACAGTTCAAGAGTCTCTTTACCAAGTACCTGGAGAATTCCATCAACTTTGTTCGGAACACAGTGAAGGAAGTGATTGCCTCAACTAA	FALSE	3	3	3	1	3	1	1	2	2	1	4	6
Dnaja2	NM_019794.4	Endogenous	mRNA	Mm	ACTGGATCAACCCAGACAAACTTTCTGAATTAGAAGATCTCCTGCCATCTAGACCAGAAGTTCCTAATGTTATTGGAGAGACAGAAGAAGTGGAGCTTCA	FALSE	192	199	143	178	133	113	102	162	116	172	195	225
Dnm1l	NM_001025947.1	Endogenous	mRNA	Mm	GGTTAATCATGTGAAAGATACTCTTCAGAGTGAACTGGTAGGGCAGCTGTATAAGTCATCCTTATTAGATGACCTTCTGACTGAATCCGAGGACATGGCC	FALSE	709	622	658	770	610	507	359	581	543	685	675	717
Dnm2	NM_001039520.1	Endogenous	mRNA	Mm	TTCAGCAGTTTGGAGTGGACTTTGAGAAGCGAATTGAAGGCTCGGGAGATCAAGTAGACACACTAGAGTTGTCTGGTGGAGCCCGCATCAATCGTATCTT	FALSE	91	88	93	106	84	88	52	66	59	93	82	74
Dot1l	NM_199322.1	Endogenous	mRNA	Mm	CACTACTGCAGGGCTTGGTGGCTCCTGTGACAAGTGCATTTACTTTGTATTTCTTTGCTTTTCTGGCTCGGGGCATGCTGGTCAGGTGACATGGGGCTGG	FALSE	33	23	32	22	24	24	9	19	13	12	16	19
Drd1	NM_010076.3	Endogenous	mRNA	Mm	TATTGGACTATGACACCGATGTCTCTCTAGAAAAGATCCAACCCGTTACCCACAGCGGACAGCATTCAACCTGAATATTGGGTTCTCATCTCTGAAGCTA	FALSE	78	59	61	92	41	46	33	63	31	65	63	59
Drd2	NM_010077.2	Endogenous	mRNA	Mm	GAATGAGTGTATCATTGCCAACCCTGCCTTCGTGGTCTACTCCTCCATCGTCTCGTTCTACGTGCCCTTCATCGTCACCCTGCTGGTCTATATCAAAATC	FALSE	2	2	8	3	7	8	4	6	1	6	3	5
Drd4	NM_007878.2	Endogenous	mRNA	Mm	AAGGCAATGAGAGTCCTGCCGGTGGTAGTCGGGGCCTTCCTGGTGTGTTGGACGCCTTTCTTCGTGGTGCACATCACGCGGGCGCTGTGTCCGGCTTGCT	FALSE	3	9	5	7	5	3	5	3	4	6	1	1
Efna1	NM_010107.4	Endogenous	mRNA	Mm	CGCCTTTTATCTTGGGCAAGGAGTTCAAGGAAGGACACAGCTACTACTACATCTCCAAACCTATCTACCATCAGGAATCCCAGTGCTTGAAGCTGAAGGT	FALSE	34	43	24	51	46	30	22	32	18	36	39	36
Efna5	NM_207654.2	Endogenous	mRNA	Mm	CCAATCAAACGGAGTCCAGATAAAAATGCCAGATTGTCAGAGTGACAGCAGCAGGTCTTGGCCTCCTGTGCGTTTTCTAGAGCTCACCTCCTTAGGTTCA	FALSE	114	123	109	156	87	110	79	104	101	109	89	154
Efnb3	NM_007911.5	Endogenous	mRNA	Mm	CCATAGTGACAAGCCTATACCTCTTCCCGCTCTTTAGTGTGCAGTGGGCTGCTGCCTCGGTGTTCTCCCGCCTCAGTTTTATTAGATCAAAGCTGCCCTT	FALSE	371	369	372	505	360	303	214	289	343	450	392	402
Efr3a	NM_133766.3	Endogenous	mRNA	Mm	TCACCATGTGATCCAAGAGATTCTAGGACACCTTGATGCTCGTAGGAAGGATTCTCCACGGGTTCGAGCAGGTATCATTCAGGTTCTGTTAGAGGCGGTC	FALSE	1109	999	963	1007	809	691	433	765	717	998	1004	875
Egf	NM_010113.3	Endogenous	mRNA	Mm	AAGTTCTGCTCAGCCGGCAGATGGGAATGGTTTTTGCCTTGGATTATGACCCTGTGGAAAGCAAGATATATTTTGCACAGACAGCCCTGAAGTGGATAGA	FALSE	2	1	2	1	1	3	1	1	4	2	1	1
Egfl7	NM_001164564.1	Endogenous	mRNA	Mm	CAGACCCAGCCGTAGAGTGTGTACTGTGGGGATTTCCGGAGGTTCCATCTCGGAGACCTTTGTGCAGCGTGTATACCAGCCTTACCTCACCACTTGCGAC	FALSE	168	187	171	194	174	190	100	151	129	166	198	215
Egfr	NM_207655.2	Endogenous	mRNA	Mm	TGCTACAAACATCAAACACTTCAAATACTGCACTGCCATCAGCGGGGACCTTCACATCCTGCCAGTGGCCTTTAAGGGGGATTCTTTCACGCGCACTCCT	FALSE	45	36	42	38	37	36	28	36	33	37	36	40
Egr1	NM_007913.5	Endogenous	mRNA	Mm	CGGCAGCAGCGCCTTCAATCCTCAAGGGGAGCCGAGCGAACAACCCTATGAGCACCTGACCACAGAGTCCTTTTCTGACATCGCTCTGAATAATGAGAAG	FALSE	344	421	419	389	469	232	189	344	334	881	355	387
Egr2	NM_010118.2	Endogenous	mRNA	Mm	CAGCTCTGTCCCACCTTCTCACGGACGGCCTTCCGAAAACTTAGGCCATTTGAAGGGAGTTGACTGTCACTCCAAGAAATGGGGGAGCAAAAAGAGGGCT	FALSE	1	4	1	5	1	2	4	4	5	11	4	3
Ehmt1	NM_001012518.2	Endogenous	mRNA	Mm	GCAGCCAGGGAGAATCGCTACGACTGTGTTGTCCTCTTTCTTTCTCGGGATTCAGATGTTACTCTGAAAAACAAGGAAGGAGAGACTCCCTTGCAGTGTG	FALSE	38	35	43	42	20	32	19	31	28	33	29	35
Eif2s1	NM_026114.3	Endogenous	mRNA	Mm	CCACAAGCGGTCAAAATTCGAGCAGATATTGAAGTAGCTTGCTATGGTTATGAAGGCATTGATGCTGTAAAAGAAGCCCTGAGGGCAGGTTTGAATTGTT	FALSE	301	319	303	365	272	190	144	276	208	285	275	305
Emcn	NM_001163522.1	Endogenous	mRNA	Mm	CAAAGATGTTCAGAATGACTCTATTCCAACACCGGCAGAAACTTCCACAACAAAAGCCTCTGTCACAATACCAGGCATCGTGTCAGTGACAAATCCTAAC	FALSE	24	33	35	32	35	43	17	18	21	18	21	28
Emp2	NM_007929.2	Endogenous	mRNA	Mm	GGTAGGATCAGCTCTCAATTGGTGCTTATCACTAGTTATCAAAGAACAGCAGAGACAGCTGCGTTATCCAAGAAGCAAGTATTAGGACCAAAACCTGTTA	FALSE	129	96	96	83	71	103	47	72	76	80	62	103
Eng	NM_001146350.1	Endogenous	mRNA	Mm	ATTTTCCCGGAATGCTGTCACATCTGGAGCTGACTCTTCAGGCATCCAAGCAAAATGGCACGGAGACCCAGGAGGTGTTCCTGGTCCTCGTTTCGAACAA	FALSE	29	30	28	30	35	52	17	28	21	23	19	24
Entpd2	NM_009849.2	Endogenous	mRNA	Mm	CGCTGCCCTCTGTCGTGACCTCGTCTCTGGGCTCTTCAATATCTCCTCCTGTCCCTTTTCCCAATGCTCCTTCAATGGGGTTTTCCAGCCTCCCGTGGCT	FALSE	46	55	37	36	28	46	16	51	37	42	43	57
Entpd4	NM_026174.2	Endogenous	mRNA	Mm	CCGAAGTCATCTCAGGAAAACAAGAAGGTGTGTATGCTTGGATCGGCATTAATTTTGTCCTCGGACGGTTTGAGCATATTGAGGAGGATGACGAGGCGGT	FALSE	48	64	72	79	61	57	34	46	47	56	64	65
Ep300	NM_177821.6	Endogenous	mRNA	Mm	TGGGACCTTTCTGGAGAATCGAGTGAATGACTTTCTGAGGCGACAAAATCACCCTGAATCAGGAGAGGTCACTGTTCGGGTTGTTCATGCTTCTGACAAA	FALSE	195	208	186	201	144	168	89	156	124	191	199	169
Epha2	NM_010139.2	Endogenous	mRNA	Mm	AGGATCTGCCAACATGGCGGTGATCGGCGGTGTGGCTGTAGGTGTTGTTTTGCTTCTGGTACTGGCAGGAGTTGGCCTCTTCATCCATCGAAGGAGGAGG	FALSE	5	2	4	4	1	3	2	2	1	5	4	5
Epha3	NM_010140.3	Endogenous	mRNA	Mm	CCGGTGAAAACAGTCATGTGGTGATGATTGCTATTTCCGCAGCTGTGGCCATCATTGTCCTCACGGTGGTCACCTATGTTCTGGTCGGGAGGTTTTGTGG	FALSE	24	19	14	20	28	22	12	14	8	23	35	23
Epha4	NM_007936.3	Endogenous	mRNA	Mm	GTATCAGTGGGCGACTGGCTGCAGGCCATCAAAATGGACCGGTATAAGGACAACTTCACGGCCGCCGGGTACACGACACTAGAAGCCGTGGTTCACATGA	FALSE	144	148	145	164	133	99	84	113	82	141	144	133
Epha5	NM_007937.3	Endogenous	mRNA	Mm	CAAATTCGAGCACGTACAGCAGCAGGCTACGGCGTCTTCAGTCGAAGATTTGAGTTTGAAACCACACCAGTGTCAGTTGCAGCATCTAATGATCAAAGCC	FALSE	467	387	440	478	396	315	208	371	318	409	436	433
Epha6	NM_007938.2	Endogenous	mRNA	Mm	TCCCTCTACGACTCATTCTTCTGATTCTCCAGCCTTCCCTTCACCACCCACCGTCTCCTGTTCCGACTATGGCTGCACACCTTACGTTTATGCTTCCACC	FALSE	204	139	184	181	171	103	83	159	131	200	197	153
Epha7	NM_001122889.1	Endogenous	mRNA	Mm	CAAGAAGTGCTGGTCCATTGTTGAGAACTTAGCTGTCTTTCCAGATACAGTGACTGGTTCGGAATTTTCCTCCTTAGTCGAGGTCCGTGGGACATGTGTC	FALSE	303	277	287	351	261	205	154	268	216	296	280	294
Epo	NM_007942.2	Endogenous	mRNA	Mm	AAAATGTCACGATGGGTTGTGCAGAAGGTCCCAGACTGAGTGAAAATATTACAGTCCCAGATACCAAAGTCAACTTCTATGCTTGGAAAAGAATGGAGGT	FALSE	1	2	2	1	1	3	1	1	1	2	1	5
Erbb3	NM_010153.1	Endogenous	mRNA	Mm	TTGATCATGAAGAACTTGAATGTCACGTCTCTGGGCTTCCGGTCCCTGAAGGAAATTAGTGCTGGGCGTGTCTACATAAGTGCCAATCAGCAACTTTGTT	FALSE	28	37	46	23	30	17	12	29	19	22	23	28
Erg	NM_133659.2	Endogenous	mRNA	Mm	AGCCATCTCCCTCTGCAGTGCCCAAAACTGAAGACCAGCGTCCTCAGTTAGATCCTTACCAGATCCTGGGACCGACCAGTAGCCGCCTTGCTAATCCAGG	FALSE	14	11	9	8	10	18	5	13	11	9	8	3
Erlec1	NM_025745.3	Endogenous	mRNA	Mm	TTTGCCATCTGCTAAGGAAGAGAGATTTCCAGCCATCCACAAACCTATTGCTGTTGGCTCTCAGCCAGTGCTCACTGTTGGAACAACCCACATTTCCAAG	FALSE	145	159	161	178	139	132	115	133	108	144	158	162
Esam	NM_027102.3	Endogenous	mRNA	Mm	GGAGACTCTGGGACTTACCGCTGTTCTGTCAATGTGCAGAATGATGAAGGCAAAAGTATAGGCCACAGCATCAAAAGCATAGAGCTCAAAGTGCTGGTTC	FALSE	63	56	72	56	52	85	34	43	37	49	66	49
F2	NM_010168.2	Endogenous	mRNA	Mm	AGACTGTGGCCTGCGGCCTTTGTTCGAGAAGAAGTCGTTGAAAGACACAACCGAAAAGGAGCTTCTTGACTCTTACATAGACGGGCGCATCGTGGAGGGC	FALSE	11	9	8	12	6	7	6	8	7	5	10	6
Fa2h	NM_178086.3	Endogenous	mRNA	Mm	CCAGGACAACATCCGGCTCTTCGCATCACTCACAAGAGAGTATTCAATGATGATGCCGGAGTCGGTGTTCATAGGCCTCTTTGTGCTGGGCATGCTTTTT	FALSE	57	65	52	87	70	41	43	42	44	58	48	58
Fam126a	XM_006535824.2	Endogenous	mRNA	Mm	CTCAACGGGAGATGCTGACAGCACAGAACAGGTTTGAAGTATTGACATTCCTTCTGCTGTGTTACAATGCTGCCTTAACCTACATGCCCAGTGTCTCTCT	FALSE	120	153	106	157	158	161	97	155	97	133	150	135
Fas	NM_007987.2	Endogenous	mRNA	Mm	TGGTGCTTGCTGGCTCACAGTTAAGAGTTCATACTCAAGGTACTAATAGCATCTCCGAGAGTTTAAAGCTGAGGAGGCGGGTTCGTGAAACTGATAAAAA	FALSE	5	7	15	16	12	20	4	5	9	14	17	14
Fasl	NM_010177.3	Endogenous	mRNA	Mm	CATTTAACAGGGAACCCCCACTCAAGGTCCATCCCTCTGGAATGGGAAGACACATATGGAACCGCTCTGATCTCTGGAGTGAAGTATAAGAAAGGTGGCC	FALSE	5	7	4	7	2	3	1	1	3	2	3	3
Fcrls	NM_030707.3	Endogenous	mRNA	Mm	ATCCAGAGTGCAATCGTGAACATCACCGTGAAAATTCCAGTGTTGAACCCGCTCCTCTCCATCAGTGTTCCTGGGGTCTTGCCCTTCATCGGAGATGTGG	FALSE	50	103	72	208	100	94	71	90	85	120	91	73
Fgf12	NM_001276419.1	Endogenous	mRNA	Mm	TTGAAAACTACTATGTGATCTATTCCTCAACCCTGTATCGCCAGCAGGAATCAGGCCGTGCATGGTTTCTAGGACTCAATAAAGAAGGTCAAATCATGAA	FALSE	1379	1249	1359	1512	1135	999	667	1164	973	1260	1256	1319
Fgf14	NM_207667.3	Endogenous	mRNA	Mm	GCTCTCGATGGAACCAAGGATGACAGCACCAATTCCACACTGTTCAACCTCATCCCAGTGGGACTGCGCGTTGTTGCCATCCAGGGAGTGAAGACAGGGT	FALSE	155	134	126	163	119	117	99	145	102	119	130	135
Fgf2	NM_008006.2	Endogenous	mRNA	Mm	CGACTGGAATCTAATAACTACAATACTTACCGGTCACGGAAATACTCCAGTTGGTATGTGGCACTGAAACGAACTGGGCAGTATAAACTCGGATCCAAAA	FALSE	19	19	26	16	17	22	11	15	19	12	15	9
Flt1	NM_010228.3	Endogenous	mRNA	Mm	GAAAAGTCCGTGTCCTCGCTTCCAAGCCCACCTCTCTATCCGCTGGGCAGCAGACAAGTCCTCACTTGCACCGTGTATGGCATCCCTCGGCCAACAATCA	FALSE	24	15	32	27	28	45	6	18	26	13	29	16
Flt4	NM_008029.3	Endogenous	mRNA	Mm	CTGTGTCACCTCTCCTGACTTGTAACTACACACATACGAAATGTACTGGGGAAGAAAACGTGCTCTGCCCTTTTTGGCAGTGTTCTGAAATGAGCTAAGA	FALSE	17	18	18	25	12	32	9	21	15	21	19	14
Fmr1	NM_008031.2	Endogenous	mRNA	Mm	GGTAATTTTGTCCATCAATGAAGTCACCTCAAAGCGAGCCCACATGTTGATTGACATGCACTTTCGAAGTCTGCGCACCAAGTTGTCTCTTATACTGAGA	FALSE	612	580	545	548	460	400	263	440	420	504	516	566
Fn1	NM_010233.1	Endogenous	mRNA	Mm	TCCAGACCCTACCGTGGACCAGGTTGATGATACTTCCATTGTTGTTCGGTGGAGTAGACCCCAGGCACCTATCACAGGGTATAGAATTGTCTATTCACCT	FALSE	119	107	88	92	104	196	52	107	81	61	99	87
Fos	NM_010234.2	Endogenous	mRNA	Mm	AGCTGGTGCATTACAGAGAGGAGAAACACGTCTTCCCTCGAAGGTTCCCGTCGACCTAGGGAGGACCTTACCTGTTCGTGAAACACACCAGGCTGTGGGC	FALSE	60	140	39	69	101	38	45	36	45	282	55	78
Frmpd4	NM_001033330.2	Endogenous	mRNA	Mm	TCCCATCCTGCTACCATCAAATATTCACTTGGAATCAAAGGTGCCAAGCCCAAATCAAGACCCTAATGATTTCTCCCAAGGAATCCAGGCATTCGGAGAG	FALSE	189	152	91	142	135	139	89	145	79	96	113	191
Fus	NM_139149.2	Endogenous	mRNA	Mm	CCTCGCGGCATCGCTTCGCGGTCGTCTGGAACTTTGTTGCTTGGCGGCCTGCGCTGCGCGCGTGCGCGGACATGGCTTCAAACGACTATACCCAACAAGC	FALSE	1017	857	935	1001	841	795	503	767	687	877	819	899
Fxn	NM_008044.2	Endogenous	mRNA	Mm	AAAGCAGAGCGTCTGCGTGGTGCATTTGAGGAACTTGGGGACATTGGACAACCCAAGCTCTCTAGACGAGACAGCGTATGAAAGACTGGCGGAAGAGACC	FALSE	48	50	49	56	49	39	31	49	32	51	61	68
Fyn	NM_008054.2	Endogenous	mRNA	Mm	TTCTTATCCGCGAGAGCGAAACCACCAAAGGTGCCTACTCACTTTCCATCCGTGATTGGGATGATATGAAAGGGGACCACGTCAAACATTATAAAATCCG	FALSE	415	367	390	463	327	352	224	327	295	427	358	406
Gaa	NM_008064.3	Endogenous	mRNA	Mm	CTACTCCTCGACCGCCATTGTCCGCCAGGTAGTGGAGAACATGACCAGGACACACTTCCCGCTGGACGTGCAATGGAATGACCTGGACTACATGGACGCC	FALSE	902	839	985	1109	926	809	477	873	656	920	1000	1007
Gabra1	NM_010250.4	Endogenous	mRNA	Mm	AAGAATTTTGGACCGACTGCTGGACGGTTATGACAATCGTCTGAGACCAGGTTTGGGAGAGCGTGTAACTGAAGTGAAGACCGACATTTTCGTCACCAGT	FALSE	1828	1733	1968	2316	1900	1331	1053	1571	1295	1825	1657	2007
Gabra4	NM_010251.2	Endogenous	mRNA	Mm	CAGGCCTTTTGTCTGCTTATCCCAGTAGAGAGCAATATTAGCTGCTGAAATGCTAATGTCCTCGCAAGATTCTGTGCTCATAACATCTGTATGTCTGGCA	FALSE	356	334	287	374	290	253	202	246	226	337	325	406
Gabrb2	NM_008070.3	Endogenous	mRNA	Mm	GCAAACAGATTTCTGGTCTAACTTAATGCAGAGAAAAGATGGGACCTTGCAATCAGTGCCCTAGAGTGAACCATATGTTGACATTCAATATCCACGTAGG	FALSE	1223	1116	1048	1410	871	824	645	987	823	1038	1170	1294
Gabrb3	NM_008071.3	Endogenous	mRNA	Mm	GTGTTAGCAGAAGAGTGGGTTCTGATCCCTATCTAGGAAAGTAGCCTCTAGTAACTTTACAGCAGCCATTTGAGTCAGTAAGTGAGGGTACAGAGGGATT	FALSE	247	235	228	277	167	175	137	219	196	238	243	266
Gabrg2	NM_177408.5	Endogenous	mRNA	Mm	TTAGAACAAGAGCTGTTACACTGAGCAAGATACCTTTGAGCAACAGCAATGAAAACAGTGGAAGCTGGGAGGGTTTAAAGTGGCATTATCAGTCTTTGAC	FALSE	536	472	434	600	420	339	232	390	340	445	411	580
Gabrp	NM_146017.3	Endogenous	mRNA	Mm	GGCTAGTGTTCGAAGGCAACAAGAGCTTTACTCTAGATGCCCGCCTTGTGGAGTTCCTCTGGGTGCCAGACACTTACATTGTAGAGTCCAAGAAGTCCTT	FALSE	1	1	1	1	2	1	1	1	1	1	1	2
Gabrr1	NM_008075.2	Endogenous	mRNA	Mm	TGAGGGGTTTCTTCATCAGTGGACTGTGTTCTTTAGACTAGGTAGCTCTGGGAAGTACCTAAATAAAATGCGTTTGCATTGAGCCCACAGGCCCATAAAC	FALSE	1	2	1	3	3	1	1	3	1	4	5	3
Gabrr3	NM_001081190.1	Endogenous	mRNA	Mm	CTGGAAACACGGCAACAAGTCCTTAAACACGGAAGAGCGCATTTCCCTTTCTCAGTTCTTCATTGAGGAGTTCAGCGCATCCAGTGGACTGGCTTTCTAC	FALSE	7	9	8	7	6	4	2	9	3	7	6	11
Gad1	NM_008077.4	Endogenous	mRNA	Mm	AGAGACACCCTGAAGTACGGGGTTCGCACAGGTCACCCTCGATTTTTCAACCAGCTCTCTACTGGTTTGGATATCATTGGTTTAGCTGGTGAATGGCTGA	FALSE	462	375	482	490	407	336	197	438	291	418	465	499
Gad2	NM_008078.2	Endogenous	mRNA	Mm	ATAATTGGGAATTGGCAGACCAACCGCAAAATCTGGAGGAAATTTTGACGCATTGCCAAACAACTCTAAAATATGCAATTAAAACAGGGCATCCCCGATA	FALSE	529	519	542	562	474	416	280	422	345	510	528	570
Gal3st1	NM_001177691.1	Endogenous	mRNA	Mm	AGTCCATCCTGGGTTACAACCTCAAGAAGAGCATCGGGCCACAACACGAGCAGCTCTGCCGGCGCATGCTCACGCCCGAAATCCAGTACCTGTCTGACCT	FALSE	43	31	27	45	43	32	13	28	26	50	42	31
Galc	NM_008079.3	Endogenous	mRNA	Mm	ACGTTACAGCTAAACGATGGTACACACTCACCTTAGGCATTAAGGGTTATTTCGCCTTTGGTATGTTGAACGGCACGATCCTATGGAAAAACGTCCGTGT	FALSE	108	90	92	113	81	90	62	88	78	104	98	103
Gata2	NM_008090.4	Endogenous	mRNA	Mm	AGGGAGACGATTGTGCTGAGTCAACCAAGTGCAATATCGGTGTCCAGTTGCTGCAGAGCACCCTAACCGGAAGTAACTTATTTTGTGCTAGTACCCGCAT	FALSE	15	14	15	21	15	29	9	9	14	20	32	15
Gba	NM_001077411.1	Endogenous	mRNA	Mm	TCAAGGGTCAGCCAGGGGATATCTTTCACCAGACCTGGGCCAATTACTTTGTCAAGTTTCTGGATGCTTATGCTAAGTATGGCCTAAGATTCTGGGCAGT	FALSE	10	17	23	20	22	17	12	24	23	30	22	20
Gdnf	NM_010275.2	Endogenous	mRNA	Mm	CAGAGGGGCAAAAATCGGGGGTGCGTTTTAACTGCCATACACTTAAATGTCACTGACTTGGGTTTGGGCTATGAAACCAAGGAGGAACTGATCTTTCGAT	FALSE	2	2	1	2	1	2	1	1	2	1	1	1
Gdpd2	NM_023608.3	Endogenous	mRNA	Mm	CCAAGAAACCACACATACTATGATACTTTTGTGAATCAGACACTGGAGGCTGTGTTGAGTGCAAACGTGTCCCAAGCTATGGTTCTTTGGCTCCCAGATG	FALSE	24	22	22	20	16	16	7	6	15	13	19	9
Gfap	NM_001131020.1	Endogenous	mRNA	Mm	CACCCTGGCTCGTGTGGATTTGGAGAGAAAGGTTGAATCGCTGGAGGAGGAGATCCAGTTCTTAAGGAAGATCTATGAGGAGGAAGTTCGAGAACTCCGG	FALSE	162	173	111	432	269	385	216	221	226	131	81	93
Gfpt1	NM_013528.3	Endogenous	mRNA	Mm	TTAAAAGTGTCCATTTTCCCGGGCAAGCAGTTGGCACAAGGCGAGGTAGCCCTCTCTTGATTGGTGTGCGGAGTGAACATAAGCTTTCTACAGATCACAT	FALSE	247	223	247	246	213	189	119	225	172	228	232	235
Gga1	NM_145929.2	Endogenous	mRNA	Mm	ACCCAGCAGCATCTTGCCAGTGACCGTTTATGACCAGCATGGCTTCCGTGTCCTCTTCCATTTTGCTCGGGACCCACTGCCAGGGCGCTCCGATGTGCTG	FALSE	36	34	51	37	45	40	21	27	23	39	46	33
Ggt1	NM_008116.2	Endogenous	mRNA	Mm	TGAACATCCTCAAAGGATACAACTTCTCTCCGAAGAGCGTAGCGACCCCTGAACAGAAGGCACTGACGTATCACCGTATCGTGGAGGCCTTTCGGTTTGC	FALSE	17	17	16	23	18	20	14	17	13	28	23	20
Gjb1	NM_008124.2	Endogenous	mRNA	Mm	GTCTGTCATCTTCATCTTCAGAATCATGGTGCTGGTGGTGGCTGCTGAGAGCGTGTGGGGGGATGAGAAGTCCTCTTTCATCTGTAACACCCTCCAGCCG	FALSE	132	102	117	146	136	83	59	58	98	129	99	118
Glrb	NM_010298.5	Endogenous	mRNA	Mm	TTTCCCATGGACACACAACGCTGCAAAATGCAACTTGAGAGCTTTGGATATACAACCGATGATTTAAGATTCATCTGGCAGTCAGGAGATCCTGTTCAGT	FALSE	1620	1571	1463	1869	1406	1117	832	1289	1072	1528	1431	1837
Gls	NM_001113383.1	Endogenous	mRNA	Mm	AGTCTGGAGGGAAGGTTGCTGATTATATTCCTCAGCTGGCCAAATTCAGTCCTGATTTGTGGGGTGTATCTGTCTGTACTGTAGATGGGCAAAGGCATTC	FALSE	1563	1362	1416	1493	1200	1154	675	1190	1017	1386	1443	1579
Gnai1	NM_010305.1	Endogenous	mRNA	Mm	ACACTATCCAGTCCATCATTGCCATCATTAGAGCCATGGGGAGGTTGAAAATCGACTTCGGAGACTCTGCTCGGGCGGATGATGCTCGCCAACTTTTCGT	FALSE	1713	1563	1622	1831	1438	1244	845	1390	1090	1596	1446	1643
Gnai2	NM_008138.4	Endogenous	mRNA	Mm	TCCCTGACCATCTGTTTCCCTGAGTACACGGGGGCCAACAAGTACGACGAGGCAGCCAGCTACATCCAGAGCAAGTTTGAGGATCTAAATAAGCGCAAAG	FALSE	982	1044	829	993	741	988	525	762	714	871	938	957
Gnai3	NM_010306.2	Endogenous	mRNA	Mm	TGCAATCATACGAGCCATGGGACGGTTGAAGATTGATTTTGGGGAATCTGCCAGAGCAGATGATGCCCGACAGTTATTTGTTTTAGCTGGGAGTGCTGAA	FALSE	128	133	114	126	110	91	63	86	85	116	130	126
Gnao1	NM_010308.3	Endogenous	mRNA	Mm	GGGCCATGGACACTTTGGGCGTGGAGTATGGTGACAAGGAGAGGAAGACGGACTCCAAGATGGTGTGTGACGTGGTGAGTCGTATGGAAGACACTGAACC	FALSE	2158	2047	2393	1942	1754	1707	892	1530	1358	1985	1895	1965
Gnaq	NM_008139.5	Endogenous	mRNA	Mm	GAATTGGGCGCTTGAACCTAAGAAAGATTGTGGACTTATCAAAAGTCACCGCTCAGTGTTCCGTCAAGCATGTATTTATGTGACGATCATACTAGGAGGG	FALSE	604	426	450	558	349	429	257	449	376	480	474	529
Gnb5	NM_138719.5	Endogenous	mRNA	Mm	GGATCATGGGATCACACCCTAAGAGTTTGGGCATAATCTTCTGACAGCGTTCAAGAATGTGTGTCCTCTCGTGTAGATATGACTTCTCCATGAGCCCAGG	FALSE	422	384	373	468	285	275	229	359	283	386	379	418
Gng2	NM_010315.4	Endogenous	mRNA	Mm	TGTGAGTACTATTGCATGAACATGTCCCTACATCGCATCCATTCAGAAGTTTCGTTGTTCAGCTGTAAAGCTAAGAAGAGAAGTGAGAGAAAAAGAGGCC	FALSE	318	298	272	373	235	304	145	302	239	318	297	309
Gngt1	NM_010314.2	Endogenous	mRNA	Mm	GAAGGAAGTGACACTGGAGAGAATGATGGTTTCCAAATGTTGTGAAGAAGTGAGAGATTATATTGAAGAAAGGTCTGGAGAAGACCCTCTAGTGAAGGGG	FALSE	1	1	1	1	1	2	1	1	1	1	3	3
Gnptab	NM_001004164.2	Endogenous	mRNA	Mm	TTTATCTAAATGACGATGTCATGTTCGGTAAGGACGTCTGGCCGGACGATTTTTACAGCCACTCCAAAGGTCAAAAGGTTTATTTGACATGGCCTGTGCC	FALSE	193	171	163	214	126	120	89	140	132	175	157	165
Gnptg	NM_172529.3	Endogenous	mRNA	Mm	GAGGAGCCTAACACATTCGGGCTGAATAACCCGTTCTTGCCCCAGGCAAGCCGCCTTCAGCCCAAGAGAGAGCCTTCAGCTGTATCCGGGCCCCTGCATC	FALSE	208	209	236	271	212	167	107	216	164	233	222	255
Gpd1l	NM_175380.5	Endogenous	mRNA	Mm	AGCATGAACTCCTGGGTTGTGGATTGACGGCTAAACAATCAGGTGTTTTAATTAGATACTCCACAGACAGGTGTCTTCTTGATACAGAGACCACATTCCT	FALSE	498	450	389	492	319	376	216	359	312	468	475	495
Gpr37	NM_010338.2	Endogenous	mRNA	Mm	TTTGGAAGATTTCTCCTGCAAGATCGTGCCCTATATCGAGGTGGCTTCTCTGGGTGTCACTACCTTCACCTTATGTGCACTGTGCATAGATCGCTTCCGG	FALSE	208	155	158	175	169	119	79	129	124	156	136	201
Gpr4	NM_175668.4	Endogenous	mRNA	Mm	TACACACAATCCTGTGCTCCACCACTTACTCACCTTCCTGTTTCCTAGCATCCCTTCCCACAGTCACCAGCCTTTACAAGTCCTTCCTCTTTGTCTGTCC	FALSE	1	1	2	1	2	5	1	2	1	1	3	3
Gpr84	NM_030720.1	Endogenous	mRNA	Mm	CCAACCTCACCCTGGCTGATCTACTCTACTGCACGCTCCTGCAGCCTTTCTCCGTGGACACATACCTCCACCTCCATTGGCGTACCGGCGCGGTCTTCTG	FALSE	1	5	5	11	3	5	4	8	5	4	7	7
Gprasp1	NM_001004359.2	Endogenous	mRNA	Mm	CTGAGGTTGAAGAACAGGCCAGGTCGGCATCTACAAAAGCAACAATCTTTGTGCCTTGGTTTTGGTCTGAAAAGCAGCCGAACATGGATTTAGGGTCTGA	FALSE	1180	984	1141	1184	895	790	582	926	719	1026	1005	1224
Gria1	NM_001252403.1	Endogenous	mRNA	Mm	ATCCTGATTGGAGGGCTGGGATTGGCCATGCTGGTTGCCTTAATCGAGTTCTGCTACAAATCCCGTAGCGAGTCGAAGCGGATGAAGGGTTTCTGTTTGA	FALSE	678	559	654	727	629	569	311	625	486	625	667	646
Gria2	NM_001039195.1	Endogenous	mRNA	Mm	GACCTCAAAATGCAGAGGATCTAATTTGCTGAGGAAAACGGTCAAAGAAGGAAAAGGAGGAAAGGGAAACGAGGGGATATTTTGTGGATGCTCTACTTTT	FALSE	785	829	1027	995	816	550	384	727	570	789	732	893
Gria3	NM_016886.3	Endogenous	mRNA	Mm	GCTTTCCGCTTTGCTGTGCAGTTATACAACACCAACCAGAACACCACTGAGAAGCCCTTCCATTTGAACTACCACGTAGACCACTTGGATTCCTCCAATA	FALSE	785	805	865	935	793	563	412	674	543	773	767	843
Gria4	NM_001113180.1	Endogenous	mRNA	Mm	GATTTTAATACGCCCATGGTGACGAAACTAATGGATCGCTGGAAGAAACTAGATCAACGAGAATATCCAGGATCTGAAACACCTCCAAAGTACACTTCTG	FALSE	161	144	186	150	160	105	79	120	97	158	150	187
Grik2	NM_010349.2	Endogenous	mRNA	Mm	CTAATGGGTTTGGGAAGCGGAGACTCCTTCCTCTTTCTGTGACCATGCCGTGATTGTGTTTGCGGCCACTATTCCACGCATCCTTCTTCTCGTCCAAGCC	FALSE	101	89	130	138	109	88	54	74	77	84	102	90
Grin1	NM_008169.2	Endogenous	mRNA	Mm	ACAGATGGCCCTGTCAGTGTGTGAGGACCTCATCTCTAGCCAGGTCTACGCTATCCTAGTTAGTCACCCGCCTACTCCCAACGACCACTTCACTCCCACC	FALSE	108	103	109	100	86	67	52	75	65	80	74	81
Grin2a	NM_008170.2	Endogenous	mRNA	Mm	CCTTCTTTTACCATTGGAAAAGCTATATGGCTCCTCTGGGGCCTGGTCTTCAACAATTCTGTGCCCGTCCAGAATCCTAAAGGCACAACCAGCAAGATAA	FALSE	110	97	129	134	118	80	48	103	76	98	112	127
Grin2b	NM_008171.3	Endogenous	mRNA	Mm	GGGAAAGCTCTTCGTATAAGGCTTTGTGAAAGAGCCATTACAGTAGGGTGAGAGAGGGGGATGTTTTTAGTCATTAACGGTAGGGTTAGTGAGAAAGGGG	FALSE	721	646	647	720	647	455	305	593	533	603	595	629
Grin2c	NM_010350.2	Endogenous	mRNA	Mm	GCTTTTCTGGAGCCCTACAGCCCTGCCGTGTGGGTGATGATGTTTGTAATGTGCCTCACGGTGGTTGCCATCACTGTCTTCATGTTCGAGTATTTCAGCC	FALSE	53	52	49	49	47	48	20	37	33	60	32	48
Grin2d	NM_008172.2	Endogenous	mRNA	Mm	ACATCACCTGGGATAACCGAGACTACTCCTTCAATGAGGATGGCTTTCTGGTAAACCCGTCACTGGTAGTCATCTCCCTCACCAGAGACAGGACGTGGGA	FALSE	21	20	22	26	24	17	8	17	13	19	19	21
Grin3b	NM_130455.2	Endogenous	mRNA	Mm	GCTCTCAACCTCTGCTACGCCATTCTCTTCGGACGCACTGTCTCCAGTAAGACACCCAAGTGTCCTACCGGACGCTTCCTCATGAATCTCTGGGCAATCT	FALSE	6	3	5	10	3	1	1	1	4	4	5	6
Grm1	NM_001114333.2	Endogenous	mRNA	Mm	CACAGGCTGTGAGCCCATTACTATCCGTTACCTCGAGTGGAGTGACATAGAATCCATCATAGCCATCGCCTTTTCTTGCCTGGGCATCCTCGTGACGCTA	FALSE	31	25	47	39	31	20	22	35	32	34	40	36
Grm2	NM_001160353.1	Endogenous	mRNA	Mm	GGATCCCAGCTTGTTCCTACTGTTTGCAATGGCCGTGAGGTGGTAGACTCAACAACATCGTCGCTTTGAAGATCCCACACTCCTGCCCTGACATGGCTGC	FALSE	262	190	162	285	197	142	115	157	143	206	226	194
Grm5	NM_001143834.1	Endogenous	mRNA	Mm	CTCCGAATCGGCCCTCTGCATCCCATCCTCTCCCAAATATGACACTCTCATCATCAGAGATTACACGCAGAGTTCTTCATCGTTGTGAGCCACTGGAAAC	FALSE	526	456	438	574	466	353	265	398	307	476	463	466
Grm8	NM_008174.2	Endogenous	mRNA	Mm	GCTCCGGGACGCTACGATATCTTCCAATATCAGATAAACAACAAAAGTACAGAATACAAAATCATCGGCCACTGGACCAATCAACTTCACCTAAAAGTGG	FALSE	14	19	11	32	15	17	9	21	18	22	26	25
Grn	NM_008175.3	Endogenous	mRNA	Mm	TCAAACTGCCATTTCTTCCGGTTTCTGTGGACCTTGTGGCCAGGTGCTCTTCCCGAGCCACAGGTGTTCTGTGAGCTTGCTTGTGTGTGTGTGCGCGTGT	FALSE	229	224	204	352	228	280	149	209	215	236	226	245
Gsk3b	NM_019827.3	Endogenous	mRNA	Mm	CCACTGATTACACGTCCAGTATAGATGTATGGTCTGCAGGCTGTGTGTTGGCTGAATTGTTGCTAGGACAACCAATATTTCCTGGGGACAGTGGTGTGGA	FALSE	702	611	695	671	578	530	318	558	512	658	613	629
Gsn	NM_146120.3	Endogenous	mRNA	Mm	GTACCTGTGTCCTGGGACAGTTTCAACAATGGCGACTGCTTCATTCTGGACCTGGGAAACAATATCTATCAGTGGTGTGGCTCTGGCAGCAACAAATTTG	FALSE	219	244	196	270	250	235	138	212	166	217	176	217
Gsr	NM_010344.4	Endogenous	mRNA	Mm	GGGGCTCACTGAAGACGAAGCTGTTCATAAGTATGGGAAAGACAATGTGAAAATCTACTCGACTGCCTTTACCCCGATGTATCACGCTGTGACCACGAGG	FALSE	132	142	115	156	121	104	83	147	107	117	114	118
Gss	NM_008180.1	Endogenous	mRNA	Mm	GAAGATTTGAAGATGTCTCTGAAAGGGGTTCTCTGGACCAAAACCGAAGGCTGTTTATGGATGACCAGGAAGTTGCTGTGGTGTACTTCCGAGATGGCTA	FALSE	78	67	78	107	79	76	47	69	61	78	79	91
Gstp1	NM_013541.1	Endogenous	mRNA	Mm	GGGCATCTGAAGCCTTTTGAGACCCTGCTGTCCCAGAACCAGGGAGGCAAAGCTTTCATCGTGGGTGACCAGATCTCCTTTGCCGATTACAACTTGCTGG	FALSE	387	390	386	435	351	307	230	290	270	405	374	411
Gtf2a1	NM_175335.3	Endogenous	mRNA	Mm	GAGAGTTTTAGGATGAAAGTAGCAAGTTTATCCAAAAGGTGGAACCAGGGACGCAAGCAGTGTCTTCAGAAACTGATCCGTTTCGACGTGTACCCAGAGT	FALSE	256	263	206	256	175	186	130	190	172	253	258	226
Gtf2b	NM_145546.1	Endogenous	mRNA	Mm	AGTAGCTCTGATCGAGCAATGATGAACGCATTCAAGGAAATCACGACCATGGCGGACAGAATCAACCTCCCTCGCAATATAGTTGATCGAACAAATAATT	FALSE	382	367	350	407	300	258	194	293	248	330	356	387
Gtf2h1	NM_008186.4	Endogenous	mRNA	Mm	AGAAACTGTACCACACAACATGACAGAAAAGGAGTTCTGGACACGCTTTTTCCAGTCCCATTATTTTCACAGGGACCGACTAAATACAGGATCGAAGGAC	FALSE	76	69	63	80	58	68	25	55	48	72	83	81
Gtf2h3	NM_181410.3	Endogenous	mRNA	Mm	GCAATGGCCGCTGACGAAGATGAGTTGAACCTTCTGGTGATCATAGTTGACACCAACCCGATTTGGTGGGGAAAGCAAGCATTAAAGGAATCTCAGTTTA	FALSE	80	70	75	74	71	52	39	58	44	68	61	82
Gtf2ird1	NM_001081464.1	Endogenous	mRNA	Mm	AAGCTGAAGAGGATTCTGGAGGAGCGACACAGCATTCACTTCATTATCAAGAGAATGTTCGATGAGCGCATTTTCACAGGGAACAAGTTTACCAAAGACC	FALSE	110	98	97	108	96	103	56	112	79	108	92	123
Gucy1b3	NM_017469.4	Endogenous	mRNA	Mm	AGGAGTCTGGCTATGATACCATCTTGCGTGTCCTGGGATCTAATGTCAGAGAGTTTTTGCAGAACCTCGATGCCCTGCATGACCACCTCGCCACCATTTA	FALSE	543	506	485	709	527	411	316	547	371	529	535	594
Gusb	NM_010368.1	Endogenous	mRNA	Mm	AATACGTGGTCGGAGAGCTCATCTGGAATTTCGCCGACTTCATGACGAACCAGTCACCGCTGAGAGTAATCGGAAACAAGAAGGGGATCTTCACTCGCCA	FALSE	59	55	50	97	60	74	26	55	50	51	45	35
H2-Ea-ps	NM_010381.2	Endogenous	mRNA	Mm	ATCATGAAGGGTATTAAAAAACGCAATGTTGTAGAACGCCGACAAGGAGCCCTGTGAGATACCTGGAGGCAATGCCTTCAGTTAAAGTTCAGTGAAGAAA	FALSE	5	6	2	5	3	1	4	2	2	4	2	3
Hap1	NM_010404.3	Endogenous	mRNA	Mm	GCTCCTTTCGTCTTCATGGCCCTGTGGGTGGGTACATGTGATTGTGCACCATTTATTAGAAGAGGAACCCGAAGTTCAGAGATCTGAGATGACTTGGCCA	FALSE	53	43	44	59	33	44	40	33	31	46	56	42
Hc	NM_010406.1	Endogenous	mRNA	Mm	CTACACACTGAATTTGGTCGCTACTCCTCTTTTCGTGAAGCCCGGGATTCCATTTTCCATCAAGGCACAGGTTAAAGATTCACTCGAGCAGGCGGTAGGA	FALSE	3	7	4	5	1	2	3	3	3	3	5	1
Hcn1	NM_010408.3	Endogenous	mRNA	Mm	GCACTTAATTGCTAACGGATCCTACCTTGTGTGAAACAATCAGCAATGCTAGGTAACGTGATGTCATTCCTGTAATGCTAGTGACCAATGGTATCCTGTT	FALSE	707	603	614	700	433	426	265	508	430	599	600	639
Hdac1	NM_008228.2	Endogenous	mRNA	Mm	TACGTCAATGACATCGTCCTGGCCATCCTGGAACTGCTAAAGTACCACCAGAGGGTGCTCTATATTGACATTGATATTCACCATGGCGATGGCGTGGAAG	FALSE	38	36	39	46	25	24	19	33	26	21	33	43
Hdac2	NM_008229.2	Endogenous	mRNA	Mm	CTGGGGACAGGCTTGGTTGTTTCAATCTAACTGTCAAAGGTCATGCTAAATGTGTAGAAGTAGTGAAAACTTTTAACTTGCCATTGCTGATGCTCGGTGG	FALSE	376	369	328	445	311	288	208	346	255	332	331	424
Hdac6	NM_010413.3	Endogenous	mRNA	Mm	TGGTTTCTGCTTTTTCAACTCAGTAGCTGTAGCTGCTCGCCATGCCCAGATCATTGCTGGACGTGCCCTGCGGATCCTAATCGTGGATTGGGATGTTCAT	FALSE	43	42	44	50	37	41	22	44	38	46	34	59
Hdac7	NM_019572.2	Endogenous	mRNA	Mm	AGGTGCTCTCTGAGTCCTGTGTCTCCTAACCCAACGGTGCCAAACCTTCATCTCCCTTCAAAAGCACAACACAATCCCAGGGATGCCTGGTCACTGTCCC	FALSE	76	64	73	68	57	67	37	55	47	69	50	61
Hexb	NM_010422.2	Endogenous	mRNA	Mm	GAAGCTACTCTTTGTCTCATGTCTATACACCAAACGATGTCCGGATGGTGCTGGAGTACGCCCGGCTCCGAGGGATTCGAGTCATACCAGAATTTGATAC	FALSE	232	310	248	540	365	325	217	216	256	252	280	274
Hgf	NM_010427.5	Endogenous	mRNA	Mm	AATAGTATGTCAAGTGGAGTGAAAAAAGGGTTTGGCCATGAATTTGACCTCTATGAAAACAAAGACTATATTAGAAACTGCATCATTGGTAAAGGAGGCA	FALSE	27	32	26	27	35	30	20	23	24	27	22	39
Hif1a	NM_010431.2	Endogenous	mRNA	Mm	ACCATGATATGTTTACTAAAGGACAAGTCACCACAGGACAGTACAGGATGCTTGCCAAAAGAGGTGGATATGTCTGGGTTGAAACTCAAGCAACTGTCAT	FALSE	454	421	387	454	343	372	236	359	297	384	373	442
Hmgb1	NM_010439.3	Endogenous	mRNA	Mm	GTGGGACTATTAGGATCAAGCAATCTGAACGTCTGTCCTTGAAGGACTGATAGAAAAGTACCTTCTAATCCTTACACGAGGACTCTCCTTTAACCGCCAT	FALSE	407	378	326	404	245	262	201	292	269	325	332	369
Hmox1	NM_010442.2	Endogenous	mRNA	Mm	CTGGGGAGGGCCTGGCTTTTTTTACCTTCCCGAACATCGACAGCCCCACCAAGTTCAAACAGCTCTATCGTGCTCGAATGAACACTCTGGAGATGACACC	FALSE	20	25	19	38	19	27	16	34	23	27	26	25
Hnrnpm	NM_001109913.1	Endogenous	mRNA	Mm	CTGGAAGAAACTGAAGGAAGTATTTAGTATGGCTGGTGTGGTGGTCCGAGCAGACATTCTGGAAGATAAAGATGGGAAAAGTCGTGGAATAGGCATTGTG	FALSE	310	312	375	328	280	236	150	289	250	277	340	338
Homer1	NM_147176.2	Endogenous	mRNA	Mm	GGAGCTGACCAGTACCCCTTCACAGGAATCAGCAGGAGGAGATCTTCAGTCTCCTTTGACACCAGAAAGTATCAATGGGACAGACGATGAGAGAACACCC	FALSE	581	669	744	537	468	496	291	630	474	667	539	642
Hpgds	NM_019455.4	Endogenous	mRNA	Mm	AGCCAACTCTTCCATTTGGCAAAATCCCTGTTTTGGAGGTGGAAGGACTTACAATCCACCAGAGCCTCGCAATAGCAAGATATTTGACCAAAAACACAGA	FALSE	26	34	18	33	29	45	18	23	17	20	17	17
Hras	NM_001130443.1	Endogenous	mRNA	Mm	GAGGCGTGGGAAAGAGTGCCCTGACCATCCAGCTGATCCAGAACCACTTTGTGGACGAGTATGATCCCACTATAGAGGACTCCTACCGGAAACAGGTGGT	FALSE	613	660	595	680	548	485	364	553	430	627	615	704
Hspb1	NM_013560.2	Endogenous	mRNA	Mm	AGGGCACACTTACCGTGGAGGCTCCGTTGCCCAAAGCAGTCACGCAGTCAGCGGAGATCACCATTCCGGTTACTTTCGAGGCCCGCGCCCAAATTGGGGG	FALSE	17	25	27	14	15	15	11	16	23	12	11	16
Htr1a	NM_008308.4	Endogenous	mRNA	Mm	CACACAAATTTCGCAGATCTCTGGGCTCTCATTGTGAAGGGTATCAACACCTCACCATTACCTACCTAGGATCTTGATCTCAGAGACCTAAAAGAGAGAG	FALSE	130	80	77	76	74	84	35	86	58	113	130	92
Htr5a	NM_008314.2	Endogenous	mRNA	Mm	GGTCACATCAGAGCTCAGCTCACTTCAGTTCTATGACCATGTGTTGGAAGTTGTATTCACCTGAAGGCTCTGGTGGTTTATGTCTGGGCACTCTTCCTCA	FALSE	78	79	82	91	76	66	45	57	64	73	72	94
Htra2	NM_019752.3	Endogenous	mRNA	Mm	GGGAGGTGATTGGAGTGAACACCATGAAGGTGACAGCTGGAATCTCCTTTGCCATCCCTTCTGATCGCCTTAGGGAGTTTCTGCATCGCGGGGAAAAGAA	FALSE	70	64	58	68	53	42	42	58	41	46	46	57
Htt	NM_010414.1	Endogenous	mRNA	Mm	TTCAGCAGACTGTACAAAGTACCTCTTAATACCACGGAAAGTACTGAGGAACAGTATGTTTCTGACATCTTGAACTACATCGATCATGGAGACCCACAGG	FALSE	186	145	168	196	156	143	76	130	112	139	148	174
Icam1	NM_010493.2	Endogenous	mRNA	Mm	CACATGGGTCGAGGGTTTCTCTACTGGTCAGGATGCTTTTCTCATAAGGGTCGACTTTTTTCACCAGTCACATAAACACTATGTGGACTGGCAGTGGTTC	FALSE	5	5	5	6	5	20	3	4	10	6	6	5
Icam2	NM_010494.1	Endogenous	mRNA	Mm	GAAGTGGAAACAGTTCTTAGTCTCAAACGTCTCCAAAGACACGGTCTTCTTTTGCCATTTCACGTGTTCGGGAAAGCAGCACTCGGAGAGTCTCAACATC	FALSE	10	15	3	10	8	20	7	6	4	6	13	10
Ide	NM_031156.2	Endogenous	mRNA	Mm	TTTCCCATGAACACTTGGAAGGAGCCCTGGACAGGTTTGCGCAGTTTTTCCTGTGCCCCTTGTTTGATGCAAGTTGTAAAGACAGAGAGGTGAACGCTGT	FALSE	192	211	203	218	153	158	95	135	140	183	174	152
Idh1	NM_010497.2	Endogenous	mRNA	Mm	CGGCTAGTGACAGGCTGGGTAAAACCCATCATCATTGGCCGACATGCATATGGGGACCAATACAGAGCAACTGATTTTGTTGTTCCTGGGCCTGGAAAAG	FALSE	112	127	89	126	87	111	69	105	80	87	87	102
Igf1	NM_010512.4	Endogenous	mRNA	Mm	GAAAATTAAAAGAAACTGCTAGAAATCCCTTCCAACCAGTGGCTGACCCCTCTCACTAGCTCACAGCAAAGTCTCCTCTGTTGATCTATCACCTAGTCTC	FALSE	45	44	30	62	36	34	29	32	34	50	41	45
Igf1r	NM_010513.2	Endogenous	mRNA	Mm	CGTATGAGAACTTCATGCATCTGATCATTGCTCTGCCGGTTGCCATCCTGCTGATCGTTGGGGGGCTGGTTATCATGCTGTATGTCTTCCATAGAAAGAG	FALSE	174	176	206	210	178	126	88	152	123	165	178	176
Ikbkb	NM_010546.2	Endogenous	mRNA	Mm	CTTACCCTGCTGAGTGACATCGCATCGGCTCTTAGATACCTTCACGAAAACAGAATCATCCATCGAGACCTGAAGCCAGAAAACATCGTTCTGCAGCAAG	FALSE	75	74	81	94	67	66	25	68	55	74	67	75
Il10	NM_010548.1	Endogenous	mRNA	Mm	GGGCCCTTTGCTATGGTGTCCTTTCAATTGCTCTCATCCCTGAGTTCAGAGCTCCTAAGAGAGTTGTGAAGAAACTCATGGGTCTTGGGAAGAGAAACCA	FALSE	1	2	1	1	1	1	1	1	1	1	1	1
Il10ra	NM_008348.2	Endogenous	mRNA	Mm	CTGTCTGTCTGTGTTAGTACACTACCCTTTAGGTGGCCTTTGGGCTTGAGCACTGGCCCAGGCTTAGGACTTATGTCTGCTTTTGCTGCTAATCTCTAAC	FALSE	19	24	15	18	16	19	5	14	10	14	21	19
Il13ra1	NM_133990.4	Endogenous	mRNA	Mm	CTCAAACCGACCGACATAATATTTTAGAGGTTGAAGAGGACAAATGCCAGAATTCCGAATCTGATAGAAACATGGAGGGTACAAGTTGTTTCCAACTCCC	FALSE	30	34	29	48	37	55	27	33	26	26	30	35
Il15ra	NM_008358.2	Endogenous	mRNA	Mm	CTTTCCTGGCCTGGTACATCAAATCAAGGCAGCCTTCTCAGCCGTGCCGTGTTGAGGTGGAAACCATGGAAACAGTACCAATGACTGTGAGGGCCAGCAG	FALSE	6	3	4	2	3	5	1	5	1	4	2	4
Il1b	NM_008361.3	Endogenous	mRNA	Mm	GTTGATTCAAGGGGACATTAGGCAGCACTCTCTAGAACAGAACCTAGCTGTCAACGTGTGGGGGATGAATTGGTCATAGCCCGCACTGAGGTCTTTCATT	FALSE	4	13	6	10	3	1	1	10	1	5	7	8
Il1r1	NM_001123382.1	Endogenous	mRNA	Mm	CTTCTTCGGAGTAAAAGATAAACTGTTGGTGAGGAATGTGGCTGAAGAGCACAGAGGGGACTATATATGCCGTATGTCCTATACGTTCCGGGGGAAGCAA	FALSE	18	21	22	31	22	39	18	24	18	16	26	27
Il4ra	NM_001008700.3	Endogenous	mRNA	Mm	CCCACAGCAGTGCTGACGTTCCTAAGTCCTGGGCTTTCCTAGCTGATGTTGTCCTACCTACTCAGTCCCATTTTGTCCACCGAATAGACCTGTCACTCAA	FALSE	23	17	19	31	31	30	14	13	18	25	32	22
Il6	NM_031168.1	Endogenous	mRNA	Mm	ATGTTCTCTGGGAAATCGTGGAAATGAGAAAAGAGTTGTGCAATGGCAATTCTGATTGTATGAACAACGATGATGCACTTGCAGAAAACAATCTGAAACT	FALSE	94	109	108	131	95	89	78	108	88	94	85	113
Il6ra	NM_010559.2	Endogenous	mRNA	Mm	CACCTCACTGCCACCTTGGCCTTCCTTGCTTTACGTTTGACTGAGTGGCCTCAGATGCTTTCCCCTGGGGCTTTGAGGAATCCAGTGATGTTAGTGGTCA	FALSE	12	26	20	23	13	21	8	13	13	13	21	17
Ina	NM_146100.4	Endogenous	mRNA	Mm	CGGTAATATCTACGAAGAAAACTGGAAAGTCGGCTACAGAAGAAAGTACCAGTTCAAGCCAAAAAATGTAATGCCGCTGCTTGAGAAAAAGTCGATGCCT	FALSE	307	259	317	274	227	190	125	221	191	296	249	258
Inhbb	NM_008381.3	Endogenous	mRNA	Mm	CGCCCAGAGCCCGGAGCCCGGCCCTGAGCTCGCTTCGCCTCGCCTCGCGGCGGGCGCCCTCGTCGCCAGCGGCGCACCATGGACGGGCTGCCCGGTCGGG	FALSE	4	2	3	3	8	5	4	4	4	6	10	3
Inpp4a	NM_172971.2	Endogenous	mRNA	Mm	AGACACTGGCTGAGAGGTTTGGAGATACGTCCTTACAAGAAGTTATCAATGTGGAGAGCTTGGTGCGGTTAAATTCCTACTTTGAGCAGTTTAAGGAGGT	FALSE	611	576	575	616	507	476	276	468	444	528	526	571
Inpp5f	NM_178641.5	Endogenous	mRNA	Mm	CCACTCTGATGAATTCCTTACAAATTCTAAGTCGGAGGAAGACAAGCAGCTAGCCAATTCTTTAGAGAGCGTAGGGCCAATAGATTACATTCTCCCAAGC	FALSE	587	568	508	656	448	493	289	528	444	580	492	538
Ins2	NM_008387.3	Endogenous	mRNA	Mm	AACTGGAGCTGGGTGGAGGCCCGGGAGCAGGTGACCTTCAGACCTTGGCACTGGAGGTGGCCCAGCAGAAGCGTGGCATTGTAGATCAGTGCTGCACCAG	FALSE	3	5	6	4	1	4	4	3	3	3	2	2
Insr	NM_010568.2	Endogenous	mRNA	Mm	AACTTGGGTGACCCTACCAAAAAGGACTCCACTAATTCCATGTTGATATCTACTGTTGCTGGGAAGGAAACAAGTAGCTATTGGGTCATGAGACTCATTT	FALSE	97	81	90	101	70	71	52	72	67	80	82	103
Ipcef1	NM_001033391.2	Endogenous	mRNA	Mm	TCACCCACAGATCAAAGCCTTCTACTTTGCAGCAGAGAATTTGCAGGAAATGAATGTGTGGTTAAACAAACTTGGATTTGCTGTGACCCACCAGGAATCC	FALSE	1100	1069	1293	1380	1143	1112	521	925	952	1258	1218	1420
Irf8	NM_008320.3	Endogenous	mRNA	Mm	GCAGGGAGAGTCATCATCTGCTTTTGTCTGAGAGAAGGAGAGCTTCTCCGTTTGTTCAACTTTGTAACAAGCTGGGTTACATGCTCCACGCAGCTAGAGA	FALSE	17	12	12	26	18	16	15	30	20	18	9	17
Islr2	NM_001161538.1	Endogenous	mRNA	Mm	CCCTCTCGCTATGTGTCTAACCATGCATTCAACCAGAGCTCAGATCTCAAGCCGCACGTTTTTGAGTTGGGCGTCATCGCGCTGGATGTAGCAGAGCGTG	FALSE	201	198	167	245	172	152	115	164	126	202	257	184
Itga5	NM_001314041.1	Endogenous	mRNA	Mm	CCTCAGCAAGAACCTGAACAACTCACAAAGCAACGTGGTCTCCTTCCCACTCTCGGTGGAGGCTCAAGCCCAGGTCTCCCTTAATGGTGTCTCCAAGCCT	FALSE	12	8	2	5	7	7	7	8	1	8	8	6
Itga7	NM_008398.2	Endogenous	mRNA	Mm	ATGAAGAGAGGCGCTCAGGTCACTTTTTACCTCATCCTCAGCACCTCTGGGATCACTATTGAGACCACAGAGCTGGAGGTGAAATTGCTGTTAGCCACGA	FALSE	22	16	26	25	17	18	8	17	23	27	11	18
Itgal	NM_008400.2	Endogenous	mRNA	Mm	TAACCCGCTACATCATCGGGATTGGCAAGCATTTTGTGAGCGTACAAAAGCAAAAGACGCTCCACATATTTGCCTCAGAACCTGTAGAGGAATTTGTGAA	FALSE	9	4	3	3	6	8	4	5	3	6	6	10
Itgam	NM_008401.2	Endogenous	mRNA	Mm	ATCTGGACACTGAACATCCCATGACCTTCCAAGAGAATGCAAAAGGCTTTGGACAGAGTGTGGTCCAGCTTGGCGGAACCAGTGTGGTTGTTGCAGCCCC	FALSE	60	73	53	90	49	91	32	51	59	49	51	66
Itgax	NM_021334.2	Endogenous	mRNA	Mm	GGGCCTGTCCCTTGCTGCTGCCACCAACCCTTCCTGGCTGTTGGCTTGTGGTCCTACTGTGCACCACACATGCAGAGAGAATATATACTTGACAGGGCTC	FALSE	4	1	3	11	7	9	3	2	8	6	1	7
Itpr1	NM_010585.2	Endogenous	mRNA	Mm	GGGGACCGTCATCCAATATGGCAACGTGATCCAGCTCCTGCATTTGAAAAGCAATAAATACCTGACTGTGAATAAGAGGCTCCCAGCCTTGCTAGAGAAG	FALSE	1177	1243	1078	1108	924	1059	561	856	891	986	957	1167
Itpr2	NM_010586.1	Endogenous	mRNA	Mm	GTGTGTGACAGAGTCAGTCATGAACATTGTGAGCGGCTTCTTCAACTCGCCATTTTCCGACAACAGTACCAGCCTCCAGACCCACCAGCCAGTCTTTATC	FALSE	32	44	42	37	32	40	26	27	32	34	33	33
Itpr3	NM_080553.3	Endogenous	mRNA	Mm	ACTGAAGATCCTGGAGATTCTGCAGTTCATCCTGAACGTACGCTTAGACTACCGCATCTCCTACCTGTTGTCGGTCTTCAAGAAGGAGTTTGTGGAGGTG	FALSE	11	12	4	8	5	8	4	5	7	8	11	7
Jam3	NM_023277.4	Endogenous	mRNA	Mm	GCAGTGAATCTCAAATCCAGCAACCGAAACCCAGTGGTACATGAATTTGAAAGTGTGGAATTGTCTTGCATCATTACGGACTCACAGACAAGTGACCCTA	FALSE	171	169	184	186	192	118	95	116	111	181	173	168
Jun	NM_010591.2	Endogenous	mRNA	Mm	CGCGACCAGAACGATGGACTTTTCGTTAACATTGACCAAGAACTGCATGGACCTAACATTCGATCTCATTCAGTATTAAAGGGGGGTGGGAGGGGTTACA	FALSE	125	147	104	126	89	141	58	94	88	139	141	136
Katna1	NM_011835.2	Endogenous	mRNA	Mm	GGGCTTTCCCGGTTTCATTTCAACTTGGTCCCGACCCGGAGCTGCGGCGGGTAGCCTGGGCTGCGCTAGCTTACATATGACCATGAGTCTTCAAATGATT	FALSE	23	20	36	27	23	26	11	13	22	26	24	28
Kcna1	NM_010595.3	Endogenous	mRNA	Mm	TGATCTTTGGGGATATTGTTGTGAATCATGGGGACACTTATCTCACAGTGACTCGCCATACGCCAGCCATCTTGGGTCAACCTCCTATGTATCTTTCCTA	FALSE	477	419	416	539	347	318	237	467	341	443	409	430
Kcnb1	NM_008420.3	Endogenous	mRNA	Mm	ATCCTTCACTGAACTGCCCTGTGAAGAATTGTGACTACTTTCTGCTGTGGTGTGGTAGGGAACACACCTACTATGAGAGGAAGTTCTCTCTCTCTTTTTT	FALSE	222	256	235	234	189	178	104	244	188	242	231	253
Kcnj10	NM_001039484.1	Endogenous	mRNA	Mm	GGATCTATGGACGACCTTCATTGACATGCAATGGCGCTACAAGCTTCTGCTCTTCTCTGCAACCTTTGCAGGCACGTGGTTCCTCTTTGGTGTGGTGTGG	FALSE	527	513	505	531	407	519	255	334	394	515	366	455
Keap1	NM_016679.4	Endogenous	mRNA	Mm	TCTATTGTCTCTGCTTGCCATTGTACATTCTGCTCAGACAGGGCATCTTGCTTCTTGTGGGACACACAGTTGTCTGTCAGTTTCAGGGCATTAGAAGCCA	FALSE	157	131	107	135	108	121	83	117	109	110	135	136
Kel	NM_032540.3	Endogenous	mRNA	Mm	GGTCCATCGTCTTTACCTCCCGGCTGTTCCAGTTTCTGAGGCCACAGCAGCAGCAGCAGGCACAGGACAAGCTCTTTCATGTGGTTACTATTGACGAACT	FALSE	5	6	5	3	1	4	2	2	3	1	1	4
Kif3a	NM_008443.3	Endogenous	mRNA	Mm	TGTCTGTCACACTGCTCTGCAGGAAGTAAGGGTTCCGTTGTTGTACGTGAATGTGCGTTTCTTAGCTATGTATTCAACTACCGTGGCTCTAGACAAGCAG	FALSE	600	464	508	549	377	357	247	441	378	484	520	508
Klk6	NM_001164696.1	Endogenous	mRNA	Mm	CAGAGCCTTCAGATGTCCAGCTCTGACCCTGGTACTTAATAAATGTAGTGACACAGAGCACAGAACACTGCTAAATCTACTTTGCTCAATCGTTGCATCC	FALSE	3	10	6	12	3	3	8	4	4	5	3	10
Kras	NM_021284.5	Endogenous	mRNA	Mm	GGGCCACTACAACAATTCAATCTCAATCCTTTGGACTTCATTCCTGCTGCCCAGGCCACTGGTGCCTCAGTAGGAATTTTCAAAATTAGTGTGAACAGAC	FALSE	472	404	345	462	272	313	204	361	281	415	417	400
L1cam	NM_008478.3	Endogenous	mRNA	Mm	TGAAGACTAATGGAACTGGCCCTGTGCGAGTTTCTACTACAGGTAGCTTTGCCTCCGAGGGCTGGTTCATCGCCTTTGTCAGCGCTATCATTCTCTTGCT	FALSE	116	79	105	120	73	61	46	69	57	94	86	94
Lama2	NM_008481.2	Endogenous	mRNA	Mm	GACTCAGCGGCGACAGTCCCAAGCGCATCAACAGAGAGGTTTATTTCCTGCTGTCCTGAATCTTGCTTCGAATGCACTCATCACAACCAATGCTACATGT	FALSE	41	37	49	42	41	43	16	35	43	45	51	55
Lamb2	NM_008483.3	Endogenous	mRNA	Mm	GGGATGATGTAGTGTGTGAGTCCCGCTACTCAGAAATCGAGCCGTCTACGGAAGGCGAGGTCATCTATCGTGTGCTGGACCCTGCTATTCCTATCCCAGA	FALSE	67	63	44	48	36	74	35	52	51	37	45	46
Lamp1	NM_010684.2	Endogenous	mRNA	Mm	AGTGATTTCCAGTCTTGTGTTGGCGTTCAGGGTGGCCCTGTCTCTGCACTGTGTACAATAATAGATTCACACTGCTGACGTGTCTTGCAGCGTAGGTGGG	FALSE	887	840	707	1055	775	748	448	735	661	855	806	962
Lclat1	NM_001177967.1	Endogenous	mRNA	Mm	ATGTTTGTGCATTTGTTAGTGGGAGAGTGCTAACTGGTGCCTCTGGAGAAACAAGCCAGCCCATGTTTAACTGCTCCATCAAAACTCACTTTAATCCTGC	FALSE	139	143	139	168	134	117	74	111	109	136	126	165
Ldhc	NM_013580.4	Endogenous	mRNA	Mm	TTTTGACATACGTGGTTTGGAAGATAAGCGGCTTCCCTGTAGGCCGTGTGATCGGAAGTGGCTGTAACCTAGACTCAGCACGTTTTCGTTACCTGATTGG	FALSE	3	1	1	2	2	1	2	4	5	6	2	3
Lif	NM_008501.2	Endogenous	mRNA	Mm	ACATCTTTCACCTGGAAGCATTGACTTCCACCGAGCATAGTAGGTAGTGTGTCTGGACCAGAGAAAAAGGGATGGGGCATTTTGCAGTTTATCCAGAGAG	FALSE	3	1	3	7	2	1	1	1	2	1	1	2
Lmna	NM_001002011.2	Endogenous	mRNA	Mm	CCAGTCCATGGGCAACTGGCAGATCAGGCGTCAGAATGGTGACGATCCTTTGATGACCTATCGCTTCCCACCGAAGTTCACCCTAAAGGCTGGGCAGGTG	FALSE	228	196	209	224	215	179	112	206	160	209	207	209
Lox	NM_010728.2	Endogenous	mRNA	Mm	GATACTTGTTGCTATTCGATCCCACGCTGCTTAGCTTTTCTGTGGGCAGAAATGTCTAATGTGACAATCAGCACATCCCCATTGTGAGGTTTCACGGCAT	FALSE	6	4	4	2	5	12	3	7	6	3	1	4
Lpar1	NM_010336.2	Endogenous	mRNA	Mm	GTTCACAGCCATGAACGAACAACAGTGCTTCTACAATGAGTCTATCGCCTTCTTTTATAACCGGAGTGGGAAATATCTAGCCACAGAATGGAACACAGTG	FALSE	19	22	17	14	23	16	6	11	11	16	15	18
Lpo	NM_080420.2	Endogenous	mRNA	Mm	CCCACAGCTTCCTACATCGAACATGTCCATGGTCCGAGATGCCATTTCAAACAGTTCCAGTGACCTACTCCTTTTAAGTTGGACACCGAGGCCAAAGGCT	FALSE	5	1	2	4	1	2	1	2	1	3	2	3
Lrp1	NM_008512.2	Endogenous	mRNA	Mm	GAGCAGATGGCAATCGACTGGCTGACGGGAAACTTCTACTTTGTCGACGACATTGACGACAGGATCTTTGTCTGTAACCGAAACGGGGACACCTGTGTCA	FALSE	602	498	657	562	567	478	267	440	459	513	499	572
Lrrc25	NM_153074.3	Endogenous	mRNA	Mm	CTGCTTCACAAGTCAGGAAGTCAAGATCTCACCTGCATGGTTCACCCGAGCAGGGTAGACTGGACTCAGACATTTAATGGCACCTGCCTCAATTTCAGTG	FALSE	8	11	7	10	2	17	5	4	11	11	11	9
Lrrc4	NM_138682.2	Endogenous	mRNA	Mm	GCTGGCGTAGCTCTCCATCAAATGCTTTCACATTGCACCAGATTCCTGCAGTTGGGCATAACCCACTCTGCAAGGCATGTGTCTATTCAGGGTTTCCCGG	FALSE	222	188	145	201	157	150	92	172	130	178	163	177
Lrrk2	NM_025730.3	Endogenous	mRNA	Mm	CCTAAATAAGCGAGGATTCCCCACCATCCGGGACTACCACTTTGTGAATGCCACCGAGGAGTCAGATGCGCTGGCAAAGCTTCGGAAAACCATCATAAAT	FALSE	160	176	204	190	162	143	71	167	132	170	145	161
Lsm2	NM_001110101.2	Endogenous	mRNA	Mm	TCTTTTTAACTGAATGGATGAGAGATAATTCCTCTGCTGAGAAGGGAGGGTAAGAGAGCCAGGAACTGCAGAATGGTCCTGGACTGGCTCCCAGTCTGTA	FALSE	95	94	75	78	60	44	37	60	61	71	61	63
Lsm7	NM_025349.2	Endogenous	mRNA	Mm	GAAAAAGAAGAAAGAAAGCATCTTGGACCTCTCCAAGTACATCGATAAGACCATTCGGGTGAAGTTCCAGGGTGGCCGGGAAGCCAGCGGTATCCTGAAG	FALSE	620	653	551	729	644	483	360	492	470	633	634	720
Lsr	NM_001164184.1	Endogenous	mRNA	Mm	GTTCCAGCCAGTGACACTACACTGCACCTACCAGATGAGCAATACCCTCACAGCCCCTATCGTGATCTGGAAGTATAAGTCGTTCTGTCGGGACCGTGTT	FALSE	22	15	7	13	12	28	8	10	7	14	19	17
Ltbr	NM_010736.3	Endogenous	mRNA	Mm	AGAGAAGGGGAGGATGGGGCCTTGGGTAGCGTTAGCATGTGTGGAGGAGAGTTTGGGAACAGGAGAAAAACGACAAGTGTATTTATGAGTTGTAATCACA	FALSE	31	35	27	28	27	35	20	28	17	19	28	21
Lypla1	XM_006495472.2	Endogenous	mRNA	Mm	ACCTTCAAAATCTATGAAGGCATGATGCACAGCTCATGTCAGCAGGAAATGATGGATGTCAAGCACTTCATTGATAAGCTCCTACCTCCAATTGATTGAC	FALSE	487	521	427	517	425	357	284	390	303	431	496	532
Mag	NM_010758.2	Endogenous	mRNA	Mm	CCGACTGATGTGGGCCAAAATCGGTCCTGTGGGTGCTGTGGTCGCCTTTGCCATCCTGATTGCCATTGTGTGCTACATCACCCAGACGAGAAGAAAAAAG	FALSE	126	122	132	144	138	98	77	69	96	136	88	110
Magee1	NM_053201.3	Endogenous	mRNA	Mm	ATTTCTGCTGATGGATTCAACTAAGCTGCCTATACCAAAGAAGGGAATCCTGTATTACATCGGTCGAGAGTGCACCAAAGTGTTCCCTGATCTCCTGAAT	FALSE	1106	943	1048	1186	923	887	513	946	756	975	1020	1164
Mal	NM_001171187.1	Endogenous	mRNA	Mm	TTTTACCTCAGTGCCTCAGTTCTGGAAGCCCTGGCCACCATCTCAATGTTTGATGGCTTTACTTACAAGCATTACCATGAAAACATCGCCGCAGTGGTGT	FALSE	389	463	444	523	438	392	209	351	397	482	463	383
Man2b1	NM_010764.2	Endogenous	mRNA	Mm	GCAACTTCATTGTGAAGGACCCTCATGATAAGAACATTTCCAGTAACGTGGTGATGGTTCCTAGCTATTACAGTGAGACTTACCAATGGGAGCTGCTGTT	FALSE	140	127	141	206	158	151	103	150	119	137	144	144
Map2	NM_008632.2	Endogenous	mRNA	Mm	ATCCCAAGGTTTCAACACACCATCTGTGGGGGGTTCTTTCTTCTGATAATTCTAGAGCCTGTTACCATAGAAAGGTATTTCTTCAATGGCTGGTTGTAGT	FALSE	5466	5852	4547	4919	2941	4415	2252	3355	3772	4588	4553	4797
Map2k1	NM_008927.3	Endogenous	mRNA	Mm	CTTTGTGCTTGGGGCTATTTGTCTGTTCATCAAACACATGCCAGGCTGAACTACAGTGAAACCCTAGTGACCTGGGTGGTCGTTCTTACTGATGTTTGCA	FALSE	1107	1019	877	1111	749	708	567	868	657	1000	1022	1088
Map2k2	NM_023138.4	Endogenous	mRNA	Mm	GTCGGCACAGTGGCCGCTGCCTCTGGGGACAGTGATGCTGTTTGTTGTGGCAGGGGACCTATGCCCATGCATTTGAAAACCAAACAAAATGAAGAAAGAG	FALSE	244	216	238	249	189	172	87	182	174	213	204	203
Mapk1	NM_011949.3	Endogenous	mRNA	Mm	TGCTGAAGCGCCATTCAAGTTTGACATGGAGTTGGACGACTTACCTAAGGAGAAGCTCAAAGAACTCATTTTTGAAGAGACTGCTAGATTCCAGCCAGGA	FALSE	3162	2947	2918	3388	2611	2094	1571	2601	2119	2839	2951	3177
Mapk10	NM_001081567.1	Endogenous	mRNA	Mm	AAGCTCTTTCCAGATTCCCTCTTCCCAGCGGATTCTGAGCACAATAAACTTAAAGCCAGCCAAGCCAGGGATTTGTTGTCTAAGATGTTAGTGATTGACC	FALSE	1554	1383	1454	1790	1191	1109	748	1221	1135	1515	1311	1592
Mapk3	NM_011952.2	Endogenous	mRNA	Mm	ACCTTAATTGCATCATTAACATGAAGGCCCGAAACTACCTGCAGTCTCTGCCCTCGAAAACCAAGGTGGCTTGGGCCAAGCTCTTTCCTAAATCTGACTC	FALSE	401	407	281	394	285	331	205	246	223	335	421	385
Mapk8	NM_016700.3	Endogenous	mRNA	Mm	GAAAACAGGCCTAAATACGCTGGATATAGCTTTGAGAAACTGTTCCCCGATGTGCTTTTCCCAGCTGACTCAGAGCATAACAAACTTAAAGCCAGTCAGG	FALSE	275	218	210	294	220	207	140	224	191	296	290	296
Mapk9	NM_207692.1	Endogenous	mRNA	Mm	ACACTACATCATGAGTGACAGTAAAAGCGATGGTCAGTTTTACAGTGTGCAGGTGGCGGACTCAACTTTCACTGTTCTAAAACGTTACCAGCAACTGAAA	FALSE	521	442	507	495	393	356	195	417	319	466	468	475
Mapkapk2	NM_008551.1	Endogenous	mRNA	Mm	GTAGCCTCTGCTTGCCCTTCTTGCCACGATTAACCCACTCTTGTCGAGTTCTCTGAAATTTTTAGCCATTTCTCAATGGGCTGTCCACTCCCACGGTGAG	FALSE	15	16	8	25	16	14	4	18	21	15	15	19
Mapt	NM_001038609.2	Endogenous	mRNA	Mm	CAGTCGAAGATTGGCTCCTTGGATAATATCACCCACGTCCCTGGAGGAGGGAATAAGAAGATTGAAACCCACAAGCTGACCTTCAGGGAGAATGCCAAAG	FALSE	355	343	423	353	297	253	146	289	251	313	287	298
Marco	NM_010766.2	Endogenous	mRNA	Mm	GCACAGAAGACAGAGCCGATTTTGACCAAGCTATGTTCCCTGTGATGGAGACCTTCGAAATCAATGATCCAGTGCCCAAGAAGAGAAATGGGGGGACCTT	FALSE	3	15	12	12	9	6	7	7	6	11	15	6
Mbp	NM_010777.3	Endogenous	mRNA	Mm	TGCCAGGCATGGCTTCCTCCCAAGGCACAGAGACACGGGCATCCTTGACTCCATCGGGCGCTTCTTTAGCGGTGACAGGGGTGCGCCCAAGCGGGGCTCT	FALSE	854	750	905	722	607	727	311	498	583	746	696	650
Meaf6	NM_027310.3	Endogenous	mRNA	Mm	ACACTCAGATGTATGGCAATATTATCCGTGGCTGGGATCGGTATTTGACCAATCAAAAGAACTCCAATAGCAAAAACGACCGGAGGAACCGGAAGTTCAA	FALSE	267	252	286	278	194	192	122	223	168	233	225	233
Mecp2	NM_010788.2	Endogenous	mRNA	Mm	AAAGGGAGCGGCACTGGGAGACCAAAGGCAGCAGCATCAGAAGGTGTTCAGGTGAAAAGGGTCCTGGAGAAGAGCCCTGGGAAACTTGTTGTCAAGATGC	FALSE	215	210	235	170	178	156	98	151	138	190	195	168
Mfn2	XM_006535920.1	Endogenous	mRNA	Mm	CTTTTTTTGGCCGGACGAGCAATGGGAAGAGCACCGTGATCAATGCCATGCTCTGGGACAAAGTTCTGCCATCTGGGATTGGTCATACCACCAATTGCTT	FALSE	298	287	336	357	273	227	160	258	243	307	303	313
Mgmt	NM_008598.2	Endogenous	mRNA	Mm	CTCCATCACCCTGTGTTCCAGCAAGATTCATTCACCAGACAGGTGTTATGGAAGCTGCTGAAGGTTGTGAAATTCGGAGAAACGGTTTCTTACCAGCAAT	FALSE	1	2	1	1	3	4	1	4	1	1	1	4
Mmp12	NM_008605.3	Endogenous	mRNA	Mm	AAGGTGGTACACTAGCCCATGCTTTTTATCCTGGACCTGGTATTCAAGGAGATGCACATTTTGATGAGGCAGAAACGTGGACTAAAAGTTTTCAAGGCAC	FALSE	3	5	1	9	3	11	2	6	3	2	4	8
Mmp14	NM_008608.3	Endogenous	mRNA	Mm	AGTTTGGGACTGAGATCAAGGCCAATGTTCGGAGGAAGCGCTATGCCATTCAGGGCCTCAAGTGGCAGCATAATGAGATCACTTTCTGCATTCAGAATTA	FALSE	37	40	32	26	29	43	14	36	25	22	28	32
Mmp16	NM_019724.3	Endogenous	mRNA	Mm	CCCTTTGAGAACTATCGGACCAGCTTACAGAGTCAGGATGATCAGTCTTGCAATCTGGTCATTTGTAGAACTGGCCAAAAGGGAAAGCCATCACAGGTTT	FALSE	38	31	37	45	23	13	16	31	19	26	32	32
Mmp19	NM_021412.2	Endogenous	mRNA	Mm	CGACGGACTCATTTCTTCAAGGGAAACAAGGTGTGGCGGTATGTGGATTTCAAGATGTCTCCTGGCTTTCCCATGAAATTCAACAGAGTAGAGCCCAACC	FALSE	5	1	5	13	9	7	9	2	5	6	4	4
Mmp2	NM_008610.2	Endogenous	mRNA	Mm	AGTTAACCAGCCTTCTCCTTCACCTGGTGACTTCAGATTTAAGAGGGTGGCTTCTTTTTGTGCCCAAAGAAAGGTGCTGACTGTACCCTCCCGGGTGCTG	FALSE	5	8	11	6	6	7	5	5	5	4	5	9
Mmp24	NM_010808.3	Endogenous	mRNA	Mm	GCTCGGCCTGACTACAGGTAAAGCAGAGAGGATTCTAGAGCCACCCTTGTCATCTTCTCAGAGTAAGGGACCAGGGCAGCCTTTTAAGTTCTCCATCTAC	FALSE	129	107	106	106	84	74	55	76	104	115	109	82
Mmp9	NM_013599.2	Endogenous	mRNA	Mm	CCTCTACAGAGTCTTTGAGTCCGGCAGACAATCCTTGCAATGTGGATGTTTTTGATGCTATTGCTGAGATCCAGGGCGCTCTGCATTTCTTCAAGGACGG	FALSE	4	4	3	7	2	7	5	6	1	9	8	9
Mmrn2	NM_153127.3	Endogenous	mRNA	Mm	TTCAACACCACATCCATCAATGTGGGCAGCAGCTACTTTCCTGAACATGGCTACTTCCGAGCTCCCAAACGTGGCGTCTACTTGTTTGCTGTGAGCATTA	FALSE	19	23	15	19	25	47	12	29	22	16	33	24
Mnat1	NM_008612.2	Endogenous	mRNA	Mm	TCTTAGGACGGCTTGGGTATTTAAACCACGTCCGGGCTGCATCTCCACAGGATCTTGCTGGCGGCTATACTTCTTCTCTTGCTTGTCACAGAGCGCTACA	FALSE	167	160	134	175	135	104	73	128	106	161	159	161
Mog	NM_010814.2	Endogenous	mRNA	Mm	AAAACTTCGTGCAGAAGTAGAGAATCTCCATCGGACTTTTGATCCTCACTTCCTGAGGGTGCCCTGCTGGAAGATAACACTGTTTGTTATTGTGCCTGTT	FALSE	247	217	223	330	270	203	146	167	156	257	185	216
Mpz	NM_008623.4	Endogenous	mRNA	Mm	ATCCTCACAGGTCAGGGGTGCAGTAGGGGGCTTTAAGAAATGTCTTCAAAATAAATAATCAGAACAGGAAACGCCAGCGAGAATGGGAAGGAAAGGAAGT	FALSE	3	7	3	9	2	5	4	5	2	12	1	3
Msn	NM_010833.2	Endogenous	mRNA	Mm	TTCTCAATGACGACATTTACTGTCCACCTGAAACTGCGGTCCTGTTGGCTTCTTATGCCGTCCAGTCTAAGTATGGTGACTTCAATAAGGAAGTGCACAA	FALSE	19	18	18	25	24	33	13	18	23	20	18	12
Mta1	NM_054081.2	Endogenous	mRNA	Mm	CGCATCAGAAGCCAACCTTTTTGAGGAAGCTCTGGAAAAATATGGGAAAGATTTCACCGACATTCAACAAGATTTTCTCCCATGGAAGTCGCTCACCAGC	FALSE	310	293	277	281	245	204	162	218	170	253	271	290
Mta2	NM_011842.3	Endogenous	mRNA	Mm	GTTGGACACCCTCTGGTGTTAGTTACTGCCTGTAACTGCCAGTAACGTCCCTTTTTGGGCTTCACAGCCTATAGGAACTTGCCTGTGTGTGTACCTACCC	FALSE	21	27	25	29	18	17	20	40	37	19	38	41
Mthfr	NR_027809.1	Endogenous	mRNA	Mm	GAAGGCCTGCACAGAGATAGGCATCTCTTGCCCTATCCTGCCTGGGATCTTCCCTATTCAGGGCTACACTTCCCTTCGGCAGCTTGTAAAACTGTCCAAG	FALSE	7	10	8	5	6	1	10	8	10	12	9	8
Mtor	NM_020009.2	Endogenous	mRNA	Mm	CATGGAGCCTATCCTGAAGGCTTTAATTTTGAAACTGAAAGATCCAGACCCTGACCCAAACCCGGGCGTGATCAATAACGTGTTGGCCACTATAGGAGAA	FALSE	371	300	364	399	321	266	147	284	249	371	306	338
Mutyh	NM_001159581.1	Endogenous	mRNA	Mm	TGGAGCCATTGCTTCCATCGCCTTTGACCAGGTAACCGGTGTGGTGGATGGGAACGTTTTACGGGTGCTGTGCCGTGTCCGGGCCATTGGTGCCGATCCC	FALSE	6	14	17	12	8	7	6	6	4	13	12	7
Myc	NM_010849.4	Endogenous	mRNA	Mm	CCCTCAACGTGAACTTCACCAACAGGAACTATGACCTCGACTACGACTCCGTACAGCCCTATTTCATCTGCGACGAGGAAGAGAATTTCTATCACCAGCA	FALSE	25	19	32	25	28	29	18	19	12	21	29	25
Myct1	NM_026793.2	Endogenous	mRNA	Mm	TTATAATGTCCTTCACCGTATCCGTGGCGATTGGGCTTGCAATCGGAGGATTTCTCTGGGCGCTGTTCGTTTTTCTGTCTCGAAGAAGAAGAGCCAGTGC	FALSE	6	11	3	8	10	13	4	2	3	4	4	5
Myd88	NM_010851.2	Endogenous	mRNA	Mm	GCTGCAGGCTCAGCTGTTTTCTCCCCAGCAGCGAGGTTTGCATCTTCTTATTCCTTTCACGTTCTCTACCATAGAGGCAATGTCATGGTCCCTCTCAGGG	FALSE	13	12	11	11	8	9	8	10	9	10	9	9
Myh10	NM_175260.2	Endogenous	mRNA	Mm	GAGCGAATGATCCGAGCTTTAGAACTGGACCCAAACCTGTATAGAATTGGACAGAGCAAGATATTTTTCCGAGCTGGAGTTTTGGCGCACTTAGAAGAAG	FALSE	944	861	869	947	810	623	440	816	670	824	757	912
Myrf	NM_001033481.1	Endogenous	mRNA	Mm	AGAGGAGTGGTGGGTTTGAGTTTGGAGGTTTTACTCAAGTGACAGCTTCAGCATTTCTTGGTAGCACCTACAGCATTCTGATTACATGCAGGTTCCTGGA	FALSE	157	165	182	181	140	128	80	103	130	166	152	149
Naglu	NM_013792.2	Endogenous	mRNA	Mm	TGGGAGGAGACAGGGTATGACAGTGAGTGACAATGATGGCTTGGAGGGAAACAAGGTGCTTTCTTCCACTCCAGACTTGGGGCTTAAAGTACCATTTTCT	FALSE	47	40	46	67	46	45	28	45	39	33	36	33
Napsa	NM_008437.1	Endogenous	mRNA	Mm	TTGGTGGAGTCTGGTTTAACCTCACAGGCCAGGACTATGTCATCAAGATTCTTCAGAGCGATGTTGGCCTCTGCCTGTTGGGCTTCCAAGCCTTGGATAT	FALSE	4	5	3	4	3	3	2	1	5	3	2	2
Ncam1	NM_001113204.1	Endogenous	mRNA	Mm	ATGCTGTGATTGTCTGTGATGTGGTCAGCTCCCTGCCTCCAACCATCATCTGGAAACACAAAGGCCGAGATGTCATTCTGAAAAAAGACGTCCGGTTCAT	FALSE	1200	1033	1259	1328	1041	777	557	873	776	1127	1051	1127
Ncf1	NM_001286037.1	Endogenous	mRNA	Mm	ACCATCCGCAACGCACAGAGCATCCACCAGCGTTCTCGGAAGCGCCTTAGCCAGGACACCTATCGCCGCAACAGCGTCCGATTCCTGCAGCAGCGCAGAC	FALSE	24	18	21	25	16	23	10	15	16	20	20	13
Ncl	NM_010880.3	Endogenous	mRNA	Mm	AATACGAATGGGATTAGCAATGCATGCCATTTCAGTGGCCTTATCTGGGTTTCAGGGGTCCTGGTCATCAGGTTCTCGCTGGTAAATCTTAAAGACCACC	FALSE	35	43	38	30	30	38	13	20	18	36	49	48
Nefh	NM_010904.3	Endogenous	mRNA	Mm	CACCAAGGGAGAGAAGTAAGAGAACAAGAGAAACACCCAGAATAGCCAAAGAAACTCAGGACGGTCCCAGTACTCAGGGGTCGGCGTAATAAATTTTATT	FALSE	353	296	324	332	249	237	136	266	228	303	238	308
Nefl	NM_010910.1	Endogenous	mRNA	Mm	ATAACCAGCGGCTACTCTCAGAGCTCGCAGGTCTTCGGCCGTTCTGCTTACAGTGGCTTGCAGAGCAGCTCCTACTTGATGTCTGCTCGCTCTTTCCCAG	FALSE	466	558	720	524	469	382	222	476	408	503	459	451
Negr1	NM_001039094.2	Endogenous	mRNA	Mm	CAGGTTCATCTCACTGTGCAAGTCCCACCGAAAATATACGACATCTCAAATGACATGACCATCAATGAAGGAACCAATGTCACCCTTACTTGTTTGGCCA	FALSE	985	856	908	1085	799	777	521	814	691	896	831	924
Nelfa	NM_011914.2	Endogenous	mRNA	Mm	GCCTGGTATCCACACAGAAACTTGGGTCTCTGAACAGTGAGCCAACACTGCCCTCCACAAGTTACCTGCCCTCTACACCCAGTGTGGTACCTGCCTCATC	FALSE	52	44	49	58	40	48	32	46	50	42	57	45
Nell2	NM_016743.2	Endogenous	mRNA	Mm	AGCTGAGAAATAAACACGAGTTCACAATCTTGGTGACCCTGAAACAGATCCACTTAAATTCGGGAGTTATCCTCTCCATCCACCACTTGGATCACAGGTA	FALSE	3764	3449	3532	4212	3393	2434	1962	3111	2565	3641	3650	4030
Neo1	NM_001042752.1	Endogenous	mRNA	Mm	TTACTTTCAACAAGATGAGCTCTTTGTATGATTGCGGGCGGGGGATATGAAAATGCAATGATCTAACTCCTGTTGCTCTTCTAGCTGGTCACATGACGGC	FALSE	143	167	114	147	153	107	78	93	120	149	151	157
Nes	NM_016701.3	Endogenous	mRNA	Mm	GCAGAGAATTGTGAAACCTCTAGAAAAAGTGAGCCAGGTCTCCCTCGAATCTCTCGAAAAAGAGAATGTGCAGTCACCAAGGTATCTGGAAGAAGATGAC	FALSE	33	22	24	37	29	33	23	20	25	32	20	42
Nf1	NM_010897.2	Endogenous	mRNA	Mm	CCCACCTATGGGCGCTGTCAGTGAACGCAAAGGGTCTATGATTTCTGTAATGTCTTCTGAAGGGAATATTGATTCACCTGTCAGCAGATTTATGGACCGG	FALSE	434	398	395	455	372	333	195	338	312	378	383	354
Nfe2l2	NR_132727.1	Endogenous	mRNA	Mm	CCTCACCTCTGCTGCAAGTAGCCTCGCCGTCGGGGAGCCCTACCACAGCGTCCGCCCTCAGCATGATGGACTTGGAGTTGCCACCGCCAGGACTACAGTC	FALSE	110	102	106	121	76	99	40	98	84	94	82	76
Nfkbia	NM_010907.2	Endogenous	mRNA	Mm	CTGCAGGCCACCAACTACAATGGCCACACGTGTCTGCACCTAGCCTCTATCCACGGCTACCTGGCCATCGTGGAGCACTTGGTGACTTTGGGTGCTGATG	FALSE	21	25	20	32	28	57	16	26	16	26	35	24
Nfkbib	NM_010908.4	Endogenous	mRNA	Mm	GCCAAACAGCCCTGCATCTAGCAGCCATCCTTGGGGAGGCATCTACAGTAGAGAAGTTGTATGCAGCCGGTGCAGGAGTGTTGGTGGCTGAGAGAGGGGG	FALSE	83	73	80	109	68	55	47	63	46	73	63	90
Ngf	NM_001112698.1	Endogenous	mRNA	Mm	CAAGGAGGTGACAGTGCTGGCCGAGGTGAACATTAACAACAGTGTATTCAGACAGTACTTTTTTGAGACCAAGTGCCGAGCCTCCAATCCTGTTGAGAGT	FALSE	21	20	13	27	12	22	15	10	10	20	15	32
Ngfr	NM_033217.3	Endogenous	mRNA	Mm	AACAGGGAGATCAATTGTAGGCTGACACACTCCTTTCTGAATGAGGGCGTCAAGTGCTTGTTGGCAGGGATGGAGTGACTTTCAGGGAAACATCTGGAAA	FALSE	2	1	1	3	4	3	4	1	1	3	2	3
Ninj2	NM_016718.2	Endogenous	mRNA	Mm	CTAGTCACCCTCATCATTGTCTCTCTGCTCCTGCAAGTGGTCATTAGCCTCCTTCTTGTGTTCATCGCCATCCTGAACCTGAATGAGGTAGAGAACCAGA	FALSE	26	21	22	34	23	8	18	14	24	16	18	19
Nkx6-2	NM_183248.3	Endogenous	mRNA	Mm	CTAACCGCCCGGGTGCGTTTGTGCTGAGCAGCGCGCCTTTAGCCGCGCTGCACAACATGGCTGAGATGAAGACGTCGCTGTTCCCCTACGCGCTGCAGGG	FALSE	14	13	6	12	10	8	3	3	6	10	4	3
Nlrp3	NM_145827.3	Endogenous	mRNA	Mm	ACGTGTACATCACATTCCTCTATGGTATGCCAGGAGGACAGCCTTGAAGAAGAGTGGATGGGTTTGCTGGGATATCTCTCCCGCATCTCCATTTGTAAAA	FALSE	5	4	7	9	4	13	5	9	4	12	8	4
Nmb	NM_026523.2	Endogenous	mRNA	Mm	TAGCAGTGGCCTCCTCTGGATGTAAATCCTAAGCTCAAATGTGTTAATCTGTTACTGTGATTTCTGGTTGGGTCACCAGGAATGTTAATGATGCAGACAC	FALSE	17	21	25	18	18	10	12	8	11	22	29	23
Nme5	NM_080637.3	Endogenous	mRNA	Mm	ATGAGCTCTGGACCTCTTGTTGCTATGATATTAGCTAGACATAAGGCCATCTCCTACTGGAAAGAACTTATGGGACCAAGTAACAGTTTAGTAGCCAAGG	FALSE	60	46	75	62	60	42	34	51	50	57	59	59
Nmnat2	NM_175460.3	Endogenous	mRNA	Mm	CACTAAAGGGCACATTCAGATGTTCGAGAGAGCCAGGGATTATCTGCACAAGACTGGAAGATTTATTGTGATTGGCGGGATTGTCTCTCCGGTCCATGAC	FALSE	1234	1127	1298	1257	1022	844	594	982	899	1036	1068	1158
Nol3	NM_030152.4	Endogenous	mRNA	Mm	AGACACCTACTGCCAAATGAATAAACTCAGGAGGGTCAGTCTGTTCCTGACTCTCCACAAGTCTGGCTCTTTGCTCAAGAACTGAGGGTGAGCGTGGGTC	FALSE	39	44	37	40	37	33	24	44	25	38	38	36
Nos1	NM_008712.2	Endogenous	mRNA	Mm	GCTGGAAGAGGAATAAATTCCGCCTCACTTATGTGGCAGAAGCTCCAGAGCTGACCCAAGGTCTTTCCAATGTTCACAAAAAGCGAGTCTCAGCCGCCCG	FALSE	102	86	91	97	94	81	43	57	43	90	91	84
Nos2	NM_010927.3	Endogenous	mRNA	Mm	CCCCCCTCCTCCACCCTACCAAGTAGTATTGTACTATTGTGGACTACTAAATCTCTCTCCTCTCCTCCCTCCCCTCTCTCCCTTTCCTCCCTTCTTCTCC	FALSE	3	2	1	2	2	7	5	1	2	3	6	1
Nos3	NM_008713.4	Endogenous	mRNA	Mm	ATACCTGGTTCCTGACAGTCTTCCTCCCCTCCAGTTCCCGGAAAGAGGGATTGTGTCACTTCGTTCGGTTGACCAAGGCTAGCCACCCTCTCTGAAGAAT	FALSE	3	2	6	5	6	3	1	7	3	4	4	2
Nostrin	NM_181547.3	Endogenous	mRNA	Mm	GATGAGTTGAATTTGGAAAAAGGAGACATCGTGACCGTCCATGAGAAGAAAGAAGAAGGATGGTGGTTCGGCTCTTTAAAAGGGAAGAGAGGCCATTTTC	FALSE	17	18	15	12	12	20	11	10	15	12	19	15
Notch1	NM_008714.2	Endogenous	mRNA	Mm	TGAGATTGATGTTAATGAGTGCATCTCCAACCCATGTCAGAATGATGCCACTTGCCTGGACCAGATTGGGGAGTTCCAATGCATATGTATGCCAGGTTAT	FALSE	64	58	60	56	57	70	24	43	57	42	59	54
Notch3	NM_008716.2	Endogenous	mRNA	Mm	ATCTGGTACAACTTGCCGTCATGGTGGTACCTGTCTCAATACACCTGGATCCTTCCGCTGCCAGTGTCCTCTTGGTTATACAGGGCTGCTGTGTGAGAAC	FALSE	12	12	12	7	6	10	11	5	9	10	7	6
Notch4	NM_010929.2	Endogenous	mRNA	Mm	GACTGCCGTGGACCACTGTGTGTCTGCCTCGTGCCTCAATGGGGGTACCTGTGTGAACAAGCCTGGCACTTTCTTCTGCCTCTGTGCCACTGGCTTCCAG	FALSE	9	7	3	7	8	6	2	7	4	5	9	10
Nova1	NM_021361.1	Endogenous	mRNA	Mm	TTGCAGAAAAAATCCGAGAAATGCCCCAAAATGTTGCCAAGACAGAACCAGTCAGTATCCTACAACCTCAGACCACCGTTAATCCTGATCGCATCAAACA	FALSE	598	470	545	608	491	384	303	451	423	524	482	551
Npas4	NM_153553.4	Endogenous	mRNA	Mm	TGCTGATCGCCTTTTCCGTTGTCGATTCAACACCTCCAAGTCCCTCCGGCGCCAGAGTTCAGGAAACAAACTGGTGCTTATTCGAGGTCGATTCCATGCT	FALSE	131	151	125	143	133	48	65	52	35	276	78	187
Npc1	NM_008720.2	Endogenous	mRNA	Mm	TGGCTGAGGCCAATTGTGGTAGCGGTGTTTGTGGGCGTTCTGTCATTCAGTGTTGCGGTGGTGAACAAAGTAGACATCGGGTTGGATCAGTCTCTCTCAA	FALSE	286	305	265	291	243	213	131	192	211	265	304	258
Npc2	NM_023409.4	Endogenous	mRNA	Mm	CCTAAGCATACAAAGGGCCCCGTGTTTTCTACTGCCTGTCTCTGTGCAAACCTTGAGTCTTAGACCCACTCTTCCCTTACAGGAATCTGAGGCAGGTAAA	FALSE	17	20	15	23	15	14	14	16	12	20	17	27
Nptn	NM_009145.2	Endogenous	mRNA	Mm	GACCTCTTTGGTCTCTCTCCCTTTCAAGTGAGCAACACCACAATGACCGTCTAAAGCATGCCTTATTTAGCCTCTCCTATAAGGGTGACCTAGCCAGGTA	FALSE	3147	2973	2813	3825	2576	2101	1672	2721	2166	3129	2788	3609
Npy	NM_023456.2	Endogenous	mRNA	Mm	GACACTACATCAATCTCATCACCAGACAGAGATATGGCAAGAGATCCAGCCCTGAGACACTGATTTCAGACCTCTTAATGAAGGAAAGCACAGAAAACGC	FALSE	446	566	554	582	469	420	272	448	325	443	434	590
Nqo1	NM_008706.5	Endogenous	mRNA	Mm	TTTCAGTTCCCATTGCAGTGGTTTGGGGTGCCAGCCATTCTGAAAGGCTGGTTTGAGAGAGTGCTCGTAGCAGGATTTGCCTACACATATGCTGCCATGT	FALSE	59	57	41	53	54	52	18	36	35	41	53	59
Nr4a2	NM_001139509.1	Endogenous	mRNA	Mm	TCTTAGAATTATTTGTTCTGCGCTTAGCATACAGGTCCAACCCAGTGGAGGGTAAACTCATCTTTTGCAATGGGGTGGTCTTGCACAGGTTGCAATGCGT	FALSE	227	152	133	107	138	108	60	144	128	272	257	138
Nrg1	NM_178591.2	Endogenous	mRNA	Mm	GTATCTAAAAACGTCATCTCCAGTGAGCATATTGTGGAGAGAGAAGTGGAGACCTCCTTTTCCACCAGTCACTACACTTCCACAGCTCATCACTCCACGA	FALSE	60	76	77	79	56	75	41	59	64	55	69	74
Nrxn1	NM_001346960.1	Endogenous	mRNA	Mm	GTGGATGAGAGTCGAAACTACATCAGTAACTCAGCACAGTCCAATGGGGCTGTGGTCAAGGAGAAGCAACCCAGCAGTGCTAAAAGCGCCAACAAAAACA	FALSE	1363	1281	1177	1382	1053	991	666	1024	888	1112	1157	1246
Nsf	NM_008740.2	Endogenous	mRNA	Mm	AACATCGACTCCAACCCTTACGACACCGACAAGATGGCCGCCGAGTTCATCCAGCAGTTCAACAACCAGGCCTTCTCAGTGGGGCAGCAGCTTGTCTTTA	FALSE	3531	2954	3266	3768	2840	2522	1681	2972	2273	3319	3424	3522
Ntf3	NM_008742.2	Endogenous	mRNA	Mm	CAATTCCCTCATCATCAAGCTGATCCAGGCGGATATCTTGAAAAACAAGCTTTCCAAACAGATGGTGGATGTTAAGGAAAATTACCAGAGCACCCTGCCC	FALSE	16	24	22	12	13	17	13	9	10	27	32	30
Ntng1	NM_001163351.1	Endogenous	mRNA	Mm	TAGAGATGTATTTGTCAAGATTCCTGTCGATCCATGCCCTGTGGGTGACAGTGTCCTCTGTGATGCAGCCCTACCTTTTCGTGTGGGGACATTATGATGT	FALSE	153	87	109	103	97	58	43	89	81	125	159	91
Ntrk1	NM_001033124.1	Endogenous	mRNA	Mm	ACTCCAGGGCCACATCATGGAGAACCCACAGTACTTCAGTGATACCTGTGTCCATCACATCAAGCGCCAGGACATCATTCTCAAGTGGGAGCTAGGGGAG	FALSE	5	6	11	6	5	8	1	4	2	5	10	7
Nts	NM_024435.2	Endogenous	mRNA	Mm	AAAAGGCAGCTGTATGAAAATAAACCCAGAAGGCCCTACATTCTCAAGAGGGGTTCCTACTACTACTGAGAAGCTAATTCTTGACCTGTGATTGTGATTG	FALSE	9	3	5	5	1	1	2	2	3	5	4	2
Nwd1	NM_176940.5	Endogenous	mRNA	Mm	GTTCCTGGTGGTTTCTGAAGACGATTCCCTTCTTGTGGCAGGCTTTGGAAGATTTGTGCGGATTTTCTTGGCTGACTCGCAAGGCTTCCACCGGTTCATG	FALSE	172	191	206	136	138	166	72	122	130	136	137	166
Olfm3	NM_153157.3	Endogenous	mRNA	Mm	TTCGTGAATACAAGTCCATTGCAGACTTTGTGAGTGGAGCTGAATCAAGGACATACAACCTCCCTTTCAAGTGGGCAGGAACTAACCATGTTGTCTACAA	FALSE	432	421	410	513	398	295	212	375	268	425	463	459
Olig2	NM_016967.2	Endogenous	mRNA	Mm	TCTGTGAATGTTCCTTTTCAGAGCACAGGAGCAAGCTTTACAGACGCTTAAAATAGCACTTGTGGAATGGAATAATCCCAAAAGTCCCGATATGGAACGG	FALSE	31	39	40	33	20	27	11	24	21	33	33	35
Opa1	NM_001199177.1	Endogenous	mRNA	Mm	CTACCAGAGGCATTTTATAGATTCTGAGCTGGAATGCAATGACGTGGTCCTGTTTTGGCGAATACAGCGCATGCTCGCTATCACTGCCAATACATTAAGG	FALSE	398	333	330	383	293	315	202	341	262	341	343	366
Optn	NM_181848.4	Endogenous	mRNA	Mm	GCTGAGCTGATGAAGAAGAGACTTCAAGAAAAGTGTCAGGCTCTGGAGAGGAAGAACTCTGCAACACCATCAGAGCTGAATGAAAAGCAAGAGCTCGTTT	FALSE	157	102	117	145	95	104	72	112	63	134	118	127
Osmr	NM_011019.3	Endogenous	mRNA	Mm	GAAGAAGCTGTGCGTTGGAACTGGACGTCTGATATCCCTTTGGAGTGTGTCAAACATTTCATAAGAATCAGGGCTCTGGTAGATGACACCAAGTCCCTTC	FALSE	17	26	28	59	35	51	27	22	34	15	26	23
Oxr1	NM_001130163.1	Endogenous	mRNA	Mm	CATTTTAAGAATGAAATTGGAGGGGCAGTCTGATTGGCATAGACCACAGCGCACACAGTCTGCAGGTTTGGGCGCATGTTTTCATCACTGAATAGAGGAG	FALSE	2117	1697	1524	1999	1303	1400	887	1511	1264	1829	1907	1804
P2rx4	NM_011026.2	Endogenous	mRNA	Mm	GTCATTTGCACACTACACACAATGGATTTCTGGTGTGCTGTTGGCTGGGTCACCTGTTGCTTATACAATGTGAGTGTACTGAGGTAAGGGGAATATGGGA	FALSE	31	34	40	51	40	44	22	36	30	48	35	58
P2rx7	NM_001038839.2	Endogenous	mRNA	Mm	GGAGAATGTCACAGAGGGTGGGGTGACGAAGTTAGGACACAGCATCTTTGACACTGCAGACTACACCTTCCCTTTGCAGGGGAACTCATTCTTTGTCATG	FALSE	26	25	22	30	31	37	16	21	19	30	32	25
P2ry12	NM_027571.3	Endogenous	mRNA	Mm	GATCACCCAGGTTCTCTTCCCATTGCTGTACACCGTCCTGTTCTTTGCTGGGCTCATCACGAACAGCTTGGCAATGAGGATTTTCTTTCAGATCCGCAGT	FALSE	52	35	36	50	37	45	26	37	36	46	41	45
Pah	NM_008777.3	Endogenous	mRNA	Mm	CTGTATCTCTGATATTCTCACTCAAAGAGGAAGTTGGTGCCCTGGCCAAGGTCCTGCGCTTATTTGAGGAGAATGAGATCAACCTGACACACATTGAATC	FALSE	12	10	18	13	6	10	10	7	8	23	11	19
Pak1	NM_011035.2	Endogenous	mRNA	Mm	CCTCAATGAAAACCCTTTGAGAGCCTTGTACCTCATTGCTACCAATGGGACGCCAGAGCTTCAGAACCCAGAGAAGTTGTCAGCTATTTTCCGGGACTTC	FALSE	1923	1800	1842	2241	1710	1470	974	1915	1462	1855	1867	2067
Palm	NM_023128.4	Endogenous	mRNA	Mm	GAGCAAAAGTCAGAAACCTTGGTGAACGCTCAGCAGACTCCGTTGGGTACCCCAAAAGAGAATCGCACGTCCACACCGGTGCGGAGTCCAGGGGGATCCA	FALSE	604	667	593	490	438	591	247	399	408	564	549	544
Park2	NM_016694.3	Endogenous	mRNA	Mm	GATGTCTTAATTCCAAACCGGATGAGTGGTGAGTGCCAGTCTCCAGACTGCCCTGGAACCAGAGCTGAATTTTTCTTTAAATGTGGAGCACACCCAACCT	FALSE	34	36	46	35	32	27	27	24	30	30	39	34
Park7	NM_020569.3	Endogenous	mRNA	Mm	TGCAAAAACGCAGGGACCATACGATGTGGTGGTTCTTCCAGGAGGAAATCTGGGTGCACAGAATTTATCTGAGTCGCCTATGGTGAAGGAGATCCTCAAG	FALSE	990	940	889	1007	876	790	541	836	635	962	942	1020
Parp1	NM_007415.2	Endogenous	mRNA	Mm	GAGTACATTGTCTACGACATTGCTCAGGTGAATCTCAAATACCTGCTGAAACTCAAGTTCAATTTTAAGACATCCCTGTGGTAAAGTGCGAGGGGTGGGC	FALSE	158	177	160	199	146	107	95	141	121	159	169	133
Pcna	NM_011045.2	Endogenous	mRNA	Mm	AGACCTTAGCCACATTGGAGATGCTGTTGTGATATCCTGTGCAAAGAATGGGGTGAAGTTTTCTGCAAGTGGAGAGCTTGGCAATGGGAACATTAAGTTG	FALSE	509	476	535	516	413	349	267	405	349	432	495	522
Pcsk2	NM_008792.3	Endogenous	mRNA	Mm	CTGGAGCAGCCAAAATGCCTCTTACATTGCCTTTATCCACACACCCGCAGTTTTCAGGTACTCTTTACACAGCCATCCAAGAGAGAAACTACCAGGTCAA	FALSE	183	159	140	181	149	118	98	141	98	158	154	213
Pde1b	NM_008800.1	Endogenous	mRNA	Mm	CTTTTCCTTGAACCGGGCAGCCGATGACCACGCTCTGAGGACCATTGTTTTTGAGTTGCTGACTCGGCATAGCCTCATCAGCCGCTTTAAGATTCCCACA	FALSE	192	191	186	215	168	168	102	157	129	195	208	200
Pde4d	NM_011056.3	Endogenous	mRNA	Mm	TGTGAATTTATGGCTTAGTTCCCAGGGTTAACTTGCTGATACCAGTCAGCCTCGTGCAGCATGTGTCTAGCCTAGACCTTAGTTGTCTTCTTGGTGTAAG	FALSE	100	92	84	83	70	74	46	89	46	84	94	114
Pdgfrb	NM_008809.1	Endogenous	mRNA	Mm	CTCAAGGACAACCGTACCTTGGGTGACTCCGGCGCTGGCGAGTTAGTTTTGTCTACTCGCAACATGTCTGAGACCCGGTACGTGTCAGAACTGATCCTGG	FALSE	10	9	3	8	6	8	7	4	4	5	3	5
Pdpk1	NM_001080773.2	Endogenous	mRNA	Mm	GGCCAACTCATTTGTAGGAACAGCACAGTATGTTTCTCCAGAGCTGCTCACAGAGAAGTCGGCGTGTAAAAGTTCAGACCTTTGGGCCCTTGGATGTATA	FALSE	516	513	480	534	392	366	246	391	352	490	471	517
Pecam1	NM_008816.2	Endogenous	mRNA	Mm	ACACCTGCAAAGTGGAATCAAACCGTATCTCCAAAGCCAGTAGCATCATGGTCAACATAACAGAGCTGTTTCCCAAGCCGAAGTTAGAGTTCTCCTCCAG	FALSE	15	13	13	19	8	22	11	16	12	10	16	11
Pfn1	NM_011072.4	Endogenous	mRNA	Mm	GCCGCCGTCCCCGGGAAGACCTTCGTTAGCATTACGCCAGCTGAGGTTGGTGTCCTGGTAGGCAAAGACCGGTCAAGTTTTTTCGTCAATGGGCTGACAC	FALSE	118	139	131	182	125	114	90	118	105	133	149	161
Pgam1	NM_023418.2	Endogenous	mRNA	Mm	GTCTCAACAAAGCAGAAACTGCTGCTAAGCATGGTGAGGCCCAGGTAAAGATCTGGAGACGATCTTATGATGTCCCACCGCCTCCCATGGAGCCTGATCA	FALSE	1145	1034	1140	1320	1107	853	601	1035	901	1193	1065	1119
Pgk1	NM_008828.2	Endogenous	mRNA	Mm	CCGGCATTCTGCACGCTTCAAAAGCGCACGTCTGCCGCGCTGTTCTCCTCTTCCTCATCTCCGGGCCTTTCGACCTCACGGTGTTGCCAAAATGTCGCTT	FALSE	757	700	841	922	725	574	381	892	610	742	743	811
Phf19	NM_028716.4	Endogenous	mRNA	Mm	TTTGGAGACCGCTTCTACCTGTTCTTCTGCTCCGTGTGTAACCAAGGCCCAGAGTATATTGAGAGGCTGCCCTTGCGATGGGTGGATATAGTTCACCTGG	FALSE	3	3	1	1	2	2	1	2	1	1	1	1
Phf2	NM_011078.2	Endogenous	mRNA	Mm	TGGCCGTCCCTTGTTGTGAACACGGACATCCTTTCTCGAGTTGCTCAGAGTGACCTGAAAGTGGCCCCGCCGACTTAAGGATCATTCTGGTTTCAGAACA	FALSE	140	148	141	118	116	110	77	108	93	142	119	124
Phf21a	NM_001109690.1	Endogenous	mRNA	Mm	TATTACTCTCTCTATTATACACCAGTGTGTGCCTGCAGCAGCCTCCACAGCCACGGTGGGTTCGTTTTTGTTTTGTTGGGTGGGGAGCAGGGACGGGCGG	FALSE	22	28	22	26	23	18	11	13	23	29	24	27
Pik3ca	NM_008839.1	Endogenous	mRNA	Mm	ACTGTCCGTTGGCCTGGGGAAACATAAACTTGTTTGATTATACAGACACCCTAGTGTCCGGGAAAATGGCTTTGAATCTCTGGCCTGTACCGCATGGGTT	FALSE	525	496	484	549	362	332	238	389	354	464	426	482
Pik3cb	NM_029094.3	Endogenous	mRNA	Mm	GTCTCAGCTGTGTGAGAACGAAATGGACCTTATTTGGACTCTACGGCAAGACTGCCGAGAAAATTTCCCTCAGTCACTGCCAAAACTACTCTTGTCAATC	FALSE	227	235	202	260	176	182	105	191	152	194	218	223
Pik3r1	NM_001024955.1	Endogenous	mRNA	Mm	GATGTCATGGTCGGTTGTAATTTTGCCTTTACAAGGTAACTGGGGTGGGAGGGGAGGGAGTGTGCCTCCTTGACATTTTGTTCAAGATATAGATTCAGTG	FALSE	627	560	462	508	273	465	225	380	412	521	515	515
Pink1	NM_026880.2	Endogenous	mRNA	Mm	GGAGCAGGCTCCAGGGACTCCCACCTTTCCCTTTGCCATCAAGATGATGTGGAATATCTCGGCAGGTTCCTCCAGCGAAGCCATCTTAAGCAAAATGAGC	FALSE	1827	1805	1522	1543	1400	1311	858	1249	1259	1650	1711	1828
Pkn1	NM_001199593.1	Endogenous	mRNA	Mm	CTGGCTGTGTTCTGGCGAGACCAGAGGGGTCTGTGTGCTCTCAAATTTCTGAAGTTGGAGGACTTCTTGGACAACGAGAGGCATGAGGTGCAGCTGGACA	FALSE	39	23	40	29	36	19	16	20	19	29	21	29
Pla2g16	NM_139269.2	Endogenous	mRNA	Mm	CATCGCTGGAGTGGGCTTGGCGGCCTTGGGCCTCGTTGGAGTCATGCTCTCCAGAAACAAGAAACAGAAGCAATGAGCTGAATGACTGCCCAGTTTTTGG	FALSE	566	550	533	510	433	435	224	413	395	517	499	531
Pla2g2a	NM_001082531.1	Endogenous	mRNA	Mm	ACCGGTGCTGTGTTACTCATGACTGTTGCTACAAGAGCCTGGAGAAAAGTGGATGTGGTACTAAGTTACTGAAATACAAGTACTCCCACCAAGGGGGCCA	FALSE	3	5	5	6	8	9	3	6	7	1	6	4
Pla2g2e	NM_012044.2	Endogenous	mRNA	Mm	CCTGGTCCAGTTTGGAGTGATGATTGAGAGAATGACGGGAAAGCCTGCCCTGCAGTACAATGACTATGGCTGCTATTGCGGTGTCGGTGGCTCCCACTGG	FALSE	2	1	3	3	1	1	1	4	1	1	5	2
Pla2g2f	NM_012045.4	Endogenous	mRNA	Mm	CCTGCCTCTCCTTCCATCTCAGGGTCAACAGTGTCTAGCCCTACCTCATATCTGTCTTCTGCCTCCATCCAATGTCAACACTGAGGACCCAGCCTTGTCC	FALSE	16	9	14	14	6	10	2	13	7	12	14	12
Pla2g4a	NM_008869.2	Endogenous	mRNA	Mm	TACCAAAGCGACAACCAAGCAAGTTGGGTCCATCGGATGCTAATGGCCTTGGTGAGCGACTCGGCTTTATTCAATACCCGAGAAGGACGTGCCGGAAAGG	FALSE	20	14	13	14	22	26	8	17	7	10	12	17
Pla2g4b	XM_925095.2	Endogenous	mRNA	Mm	TGTTATGGAACTGAAAGTCTTTGACCATGACCTGGTGACCAAAGATGACCCAGTGTTGTCAGTGCTGTTTGACGTGGGGACCCTGCAAATTGGGACTCAG	FALSE	5	12	7	11	3	14	5	6	12	7	11	10
Pla2g4c	NM_001168504.1	Endogenous	mRNA	Mm	AGAAGACATGTTCTGTATATGCTTGCGTATCTGCTGCCTTAGTGCCTCCTTCCTGCTTGCCTACTTCCTCTCCTTTCCATCCCTTCCACCTGTAACTCTT	FALSE	2	1	1	1	1	1	1	1	1	2	2	1
Pla2g4d	NM_001024137.1	Endogenous	mRNA	Mm	CCAGTTGGTCCTAGAGGAATTGAATACCTCCTGTGACACGTACATAAGACACCTGATGGCAGCAGACTGTTCACTGCTAATGGACATCTCCTTAGTTTTT	FALSE	2	4	3	3	1	2	2	2	1	4	2	1
Pla2g4e	NM_177845.4	Endogenous	mRNA	Mm	TTCCTACTCGAAGAGAATTTCTCCTCATCAGAGACCCTCATCACCAACGGCGTGCTGGTGTCTCGCCAAGTCTCTTGCCTGGAGGTTCATGCAGAATCCA	FALSE	26	19	19	32	31	28	11	26	13	14	23	18
Pla2g4f	NM_001024145.2	Endogenous	mRNA	Mm	CAGACCTTTAACTTTACCCGAGGTCTCTGCATGTACAAAGACTACACAGCTAGAAAGGACTTCGTGGTCTCTGAAGATGCATGGCATTCACATAACTATG	FALSE	1	5	11	4	2	1	3	3	3	2	6	3
Pla2g6	NM_001199023.1	Endogenous	mRNA	Mm	CCCACAGAGGATGCAGTTCTTCGGACGCCTCGTCAACACCCTCAGTAGCGTCACCAACTTGTTCTCGAACCCATTCCGGGTGAAGGAGGTGTCCCTGACT	FALSE	105	73	81	95	75	52	50	75	53	92	84	75
Plcb1	NM_019677.1	Endogenous	mRNA	Mm	CCAGAAGGGCGCATTCCTCTTAAAAACATCTATCGATTGTTCTCAGCAGACCGGAAGCGCGTTGAAACTGCACTAGAGGCTTGTAGTCTTCCATCTTCGA	FALSE	823	715	800	949	699	588	394	713	590	732	686	790
Plcb2	NM_177568.2	Endogenous	mRNA	Mm	CTGAAACTGGTTCACCCTCTTTTCTGGATCTAGGTCTGGCACTTCCTGGCAGGTGCGCCACCAGTCTTGGGTGGGGGCTTGAGTTCATCGTCATTTTCTT	FALSE	8	5	7	8	7	9	3	6	3	10	5	9
Plcb3	NM_008874.3	Endogenous	mRNA	Mm	TCAACGCTCGTCAACTACGTTGAGCCCGTCAAGTTCAAGTCCTTCGAGGCTGCTCGAAAAAGGAACAAGTGCTTCGAGATGTCATCCTTCGTGGAGACCA	FALSE	39	42	32	36	35	37	21	35	30	19	26	28
Plcb4	NM_013829.2	Endogenous	mRNA	Mm	TCTTCAAAGTAGATGAATTCGGCTTCTTCCTGACGTGGAAGAGTGAAGGCAAGGAAGGACAAGTGCTAGAATGTTCCCTCATCAACAGTATTCGCCAAGC	FALSE	84	86	91	79	65	66	48	67	45	73	72	75
Plcl2	NM_013880.3	Endogenous	mRNA	Mm	GACTGTATCAACTCAATGGTTGAGGGCTCTGAACTCAAAAAGGTTCGTTCTAACTCCAGAATTTACCATCGGTATTTTCTGCTGGACGCCGACATGCAAA	FALSE	964	976	960	1192	884	960	549	912	818	993	857	1048
Plekho2	NM_153119.2	Endogenous	mRNA	Mm	AGTGGGGAAGAAAAGGAATCCTGGATCAAAGCTCTCAACGAAGGGATCAACCGAGGCAAGAACAAGGCTTTTGATGAGGTAAAAGTAGACAAGACCTGTG	FALSE	64	45	43	32	45	39	18	24	33	61	34	51
Pllp	NM_026385.3	Endogenous	mRNA	Mm	GCACATGAAGTTGTACATGGTGCCCTGGCCGTTGGTGTTACTGATCTTTTTTGTCGCTGCCACGGTTCTCTACATTACTGCCTTTATCGCCTGTGCAGCG	FALSE	82	52	57	94	83	61	38	54	53	74	54	76
Pls1	NM_001033210.3	Endogenous	mRNA	Mm	ATAGATGCCATTGCACCAAATGCAGTCCGTCAAGAAATGATCAAGAGAGAGCACTTGACTGATGAGGACAAACTGAACAATGCTAAATACGCCATTTCAG	FALSE	81	62	81	82	89	60	42	48	79	79	47	67
Plxnb3	NM_019587.2	Endogenous	mRNA	Mm	ATGGGCAGTATCTCCAGACAGGAGGCAACATCAGTGTCTTTGTGGGTGACCAACCTTGCCCTATCCAGGAGCCTGTGTGTCCTGAAGCCATCATATGCCA	FALSE	29	44	28	44	47	40	27	30	29	49	27	42
Plxnc1	NM_018797.2	Endogenous	mRNA	Mm	GGATGTGATCCGGGTTAGCCATGTGCTAAATGACACGCATATGAAATTCTCACTTCCATCAAGCCGCAAAGAAATGAAAGACGTTTGCATCCAGTTTGAC	FALSE	183	173	165	174	153	126	89	158	136	147	164	202
Pmp22	NM_008885.2	Endogenous	mRNA	Mm	TCCTGTCTGTCATCTTCAGCGTCCTGGCTCTGTTCCTGTTCTTCTGCCAGCTCTTCACTCTCACCAAAGGCGGCCGGTTTTACATCACTGGATTCTTCCA	FALSE	27	22	30	43	26	34	17	17	37	34	26	28
Pnkd	NM_019999.2	Endogenous	mRNA	Mm	GTCATTAAAGGCTGACTTTCTTCCAGCCTGGTACTCATCCGGCTCTTTGCAGTTTGCCAAAAACCTTCATTCCCACGTCATTTCCCACTGGATCCCAGGG	FALSE	420	334	335	391	262	291	177	307	284	365	361	362
Polr2b	NM_153798.2	Endogenous	mRNA	Mm	CGGTTCAAGAGGGGCAAAGCCTGGTGTTACTAAGGAGAAAAGAATTAAATATGCAAAAGAAGTCTTACAGAAAGAAATGCTCCCTCACGTTGGTGTCAGT	FALSE	163	132	159	202	152	123	90	118	104	136	162	172
Polr2h	NM_145632.2	Endogenous	mRNA	Mm	CGGGCATCCTGTTCGAGGATATTTTCGATGTGAAAGACATCGACCCAGAAGGCAAGAAATTTGACCGAGTATCCCGGCTGCACTGTGAGAGTGAATCTTT	FALSE	213	199	182	243	179	166	110	194	161	200	207	236
Polr2j	NM_011293.2	Endogenous	mRNA	Mm	TCCTCCGGCCTTCGAGTCGTTCTTGCTCTTCGAGGGCGAGAAGAAAATCACCATTAACAAGGACACTAAGGTTCCCAACGCCTGCTTGTTCACCATCAAC	FALSE	139	128	182	177	122	102	91	124	110	131	185	150
Polr2k	NM_001039368.1	Endogenous	mRNA	Mm	GGATACAGAATAATGTACAAGAAAAGGACTAAAAGATTGGTGGTTTTTGATGCTCGATGAAATGTGGGAGTTCAGAAGTATCTTCATTCATACATTTGCC	FALSE	471	514	475	448	336	351	238	344	311	410	396	385
Polr2l	NM_025593.1	Endogenous	mRNA	Mm	AAGTCCTGTTACCCTGGAAGGAACTGTTTAGTAAAGATGTTTGCAGAACCACCAACAGGTCTAACTTCCAAGGTGCTCCATGTCCATGTCTGTGCTGTCT	FALSE	23	34	33	26	26	17	20	25	18	27	25	27
Ppargc1a	NM_008904.2	Endogenous	mRNA	Mm	CGAGAATTCATGGAGCAATAAAGCGAAGAGCATTTGTCAACAGCAAAAGCCACAAAGACGTCCCTGCTCAGAGCTTCTCAAGTATCTGACCACAAACGAT	FALSE	221	184	214	201	137	148	78	144	155	179	170	179
Ppm1l	NM_178726.3	Endogenous	mRNA	Mm	GCTCGCTTCCTTCATTAGTTCAGTAGAGTCGGGATGCAGTTAGCCAGCCCTTACGCCTCTCATGGAGTGCAGCCTCGCCATTTGTTCACACCTTACGATG	FALSE	387	309	347	385	291	264	162	349	289	331	311	293
Ppp2ca	NM_019411.4	Endogenous	mRNA	Mm	TGCCATGACCGGAACGTAGTAACAATTTTCAGTGCTCCAAACTATTGCTATCGTTGTGGTAACCAAGCTGCAATCATGGAACTTGACGACACTCTTAAGT	FALSE	2752	2649	2402	2968	2178	1904	1430	2254	1901	2567	2589	2882
Ppp2r5c	NM_001135001.1	Endogenous	mRNA	Mm	GAACAACGAGTACATCATGAGTTTAATCAGTGACAACGCAGCGAAGATTCTGCCCATCATGTTTCCGTCCTTATACCGCAACTCAAAGACCCACTGGAAC	FALSE	1251	1217	997	1167	820	943	542	862	782	1086	1051	1125
Ppp2r5e	NM_012024.2	Endogenous	mRNA	Mm	GGGATGACATGTGCTCATTTGACATGAGGAAGGTCAGGACCTCTTTCTGCACCGTGTCCTGTCCTCAGAGCTAAGGGTCAGTGTTGTCTGTTGGTCATTC	FALSE	453	394	369	417	280	273	201	320	294	366	388	381
Ppp3ca	NM_008913.4	Endogenous	mRNA	Mm	AGGGCATGATGGGATTGCTGCATCTCAGCAGTTGGATGTTCTTGCCTCTGAAGGTAGCTTGTTTGCTCTGGGGGCCAGGAATTGGATTCAGTTTACACTA	FALSE	4425	4128	4065	4688	3321	3076	2185	3836	3017	4068	3702	4545
Ppp3cb	NM_008914.1	Endogenous	mRNA	Mm	GGGCGGGTGGATGAAGAAATTGCACTAAGAATTATCAATGAGGGTGCTGCCATACTTCGGCGGGAGAAAACCATGATAGAAGTAGAAGCTCCAATTACAG	FALSE	1616	1445	1403	1822	1335	1117	839	1335	1086	1436	1435	1706
Ppp3cc	NM_008915.2	Endogenous	mRNA	Mm	CAACAGTTTATTATCAATAATCAGAGCCCATGAAGCCCAGGATGCGGGGTACCGAATGTATAGGAAGAACCAAGCAACTGGCTTTCCGTCACTTATTACG	FALSE	399	352	368	460	294	383	214	313	265	368	384	366
Ppt1	NM_008917.3	Endogenous	mRNA	Mm	GGATTAAAGGCATGCATCACCACAGCCTACAGCAATGTGTGTCTTATATACTATGAGATAGTGAGGGAGTATAGAAGTGAAAACCAGGTGTCTGTTCTTG	FALSE	289	318	298	384	233	327	180	255	215	287	304	378
Pqbp1	NM_001252528.1	Endogenous	mRNA	Mm	CAAGGTGTTTGACCCTTCTTGCGGACTCCCTTACTATTGGAATGTGGAGACAGACCTTGTGTCGTGGCTCTCACCACATGATCCTAACTTTGTCGTTACC	FALSE	68	89	81	80	60	63	38	65	44	97	98	91
Prf1	NM_011073.2	Endogenous	mRNA	Mm	ACAGCTACTGATGCCTACCTAAAGGTCTTCTTTGGTGGCCAGGAGTTCAGGACCGGTGTCGTGTGGAACAATAACAATCCCCGGTGGACTGACAAGATGG	FALSE	5	5	2	4	4	3	1	8	4	2	3	3
Prkaa2	NM_178143.1	Endogenous	mRNA	Mm	TCCAGCATTCTGTTTACTCGTAGAACTCTGTAACTCTCCTGTGCCTGTGACAAGTTTGCATGGGTAGTACTGGGTGAGTGTGGTGGCGCTTGCTAACTTA	FALSE	85	70	84	102	72	74	34	64	57	88	85	103
Prkaca	NM_008854.3	Endogenous	mRNA	Mm	CCTGAAGCCCGAGAATCTTCTCATCGACCAGCAGGGCTATATTCAGGTGACAGACTTCGGTTTTGCCAAGCGTGTGAAAGGCCGTACTTGGACCTTGTGT	FALSE	428	371	437	500	366	317	208	380	285	474	390	458
Prkacb	NM_011100.3	Endogenous	mRNA	Mm	TTCCCTCCTCAGCTAATATTCTCAAGGGTATCCCGCTGTGAAGTAAGCTTTGATAGCAACACGTTTCTGTTTGTCCTCCCTCTTACCTCCACAGTGTGCT	FALSE	2275	2143	1920	2415	1539	1622	1120	1877	1636	2242	2314	2408
Prkca	NM_011101.3	Endogenous	mRNA	Mm	TGGCTCAGCATTCGTGTGGTCAGGTGTCAGTCAATGAACAGAAGACACACCAGGTTGTTAAACAGCCTTACTGTGACCCTCCTCAGAAGCCCACAAGTTC	FALSE	420	376	382	453	324	324	189	361	298	396	397	429
Prkcb	NM_008855.2	Endogenous	mRNA	Mm	CAGAGTCCATTGCCGAGCCTGTGTGTAAGGCTTCAGGCCGAATGTCTGTTACCAATTCCAGTCTTCCAGGATTCATGGTGCCTCTATTGGCATCCGTCAT	FALSE	4042	3785	3473	3764	2656	2856	1826	2870	2654	3550	3347	3617
Prkce	NM_011104.2	Endogenous	mRNA	Mm	CCCGAAAATTTGATGAGCCTCGTTCTCGGTTCTATGCCGCAGAGGTCACATCAGCCCTCATGTTTCTCCACCAGCACGGAGTGATCTACAGGGATTTGAA	FALSE	1627	1385	1444	1638	1297	1059	704	1296	1055	1481	1384	1414
Prkcg	NM_011102.3	Endogenous	mRNA	Mm	TTTAATGTACCACATCCAGCAACTGGGCAAGTTTAAGGAGCCTCATGCAGCATTCTACGCTGCGGAAATCGCCATAGGCCTCTTCTTCCTTCACAACCAG	FALSE	1143	904	1179	1199	927	744	489	965	739	1098	1185	1002
Prkcq	NM_008859.2	Endogenous	mRNA	Mm	CTGAAGATCGATGACTTCATCCTGCACAAGATGTTGGGAAAAGGAAGTTTTGGCAAGGTCTTCCTGGCAGAGTTCAAGAGAACCAATCAGTTTTTCGCAA	FALSE	31	23	25	32	31	28	12	28	24	33	27	26
Prkcsh	NM_008925.1	Endogenous	mRNA	Mm	TTTCGGTCCCTCTGGAGAGTTTGCATATCTCTACAGCCAATGCTACGAGCTCACCACCAATGAGTACGTCTACCGGCTTTGCCCCTTCAAACTGGTCTCC	FALSE	260	282	226	306	228	209	139	194	186	260	229	262
Prl	NM_011164.1	Endogenous	mRNA	Mm	TGCTGTTCTGCCAAAATGTTCAGCCTCTGCCAATCTGTTCCGCTGGTGACTGCCAGACTTCTCTCCGAGAGCTGTTTGACCGTGTGGTCATACTTTCTCA	FALSE	15	11	146	22	2	3	6	4	14	424	139	10
Prnp	NM_011170.2	Endogenous	mRNA	Mm	ATTGTCCTACTGACGTTGAAAGCAAACCTTTGTTCATTCCCAGGGCACTAGAATGATCTTTAGCCTTGCTTGGATTGAACTAGGAGATCTTGACTCTGAG	FALSE	6692	6185	5058	7065	4155	4928	3272	5035	4337	6152	6455	7210
Prpf3	NM_027541.4	Endogenous	mRNA	Mm	TTGAGAAAATTGCTCAACGATTACGGACAAAGGCTCAATTGGAGAAGCTGCAAGCAGAGATTTCACAAGCTGCTAGAAAAACAGGCATTCATACTTCGAC	FALSE	75	73	73	95	60	48	42	84	68	91	71	84
Prpf31	NM_001159714.1	Endogenous	mRNA	Mm	ACGGGCAGAAAGGTCTTCCTCACACTCAGCTTTTTTACTTACAGGGGGAAAGGCAGTGCTTTTATAGAACGAGTACAATTAAATGTGTAGTGTCGGGCTC	FALSE	213	207	189	228	202	161	117	161	122	184	229	237
Psen1	NM_008943.2	Endogenous	mRNA	Mm	GTAGCTAGTATCCAATAACCCAGGGGTTTCCTCATGTGATGCAAATACTACGTGTCCAACCAATCAGTGCTGTCAACGGGCTGCCATAGCTCCTTCGATG	FALSE	166	160	151	193	126	114	88	134	120	163	172	184
Psen2	NM_001128605.1	Endogenous	mRNA	Mm	CAAGTATCGATGCTACAAGTTCATCCATGGCTGGCTGATCATGTCCTCCCTGATGCTCCTCTTCTTGTTCACCTACATCTACCTCGGGGAAGTGCTCAAG	FALSE	51	35	29	48	45	33	20	34	28	37	37	40
Psmb8	NM_010724.2	Endogenous	mRNA	Mm	CCTGAGGTCCTTTGGTGGTGACCAGGAAAGGAATGTTCAAATTGAGATGGCCCACGGCACAACCACACTCGCCTTCAAGTTCCAGCATGGCGTCATCGTG	FALSE	33	45	37	49	44	70	34	27	27	37	28	53
Psmb9	NM_013585.2	Endogenous	mRNA	Mm	TTCACCACAGATGCCATCACTCTGGCCATGAACCGAGATGGCTCTAGTGGGGGTGTCATCTACCTGGTCACCATCACAGCTGCTGGTGTGGACCATCGAG	FALSE	19	22	16	31	23	35	12	26	21	15	18	23
Ptdss1	NM_008959.3	Endogenous	mRNA	Mm	ATGCTTTGGCTTCTTTGTGTGGCCTTCACCACGTTCCTGTGTCTGTACGGCATGGTTTGGTATGCAGAGCACTATGGTCACCGGGAAAAGACCTATTCAG	FALSE	288	293	276	355	225	229	152	247	213	287	255	306
Ptdss2	NM_013782.4	Endogenous	mRNA	Mm	CGAGTGGCTGTCCCTGAAGACATATAAGTGGCAGGGCCTCTGGAACATTCCAACCTACAAGGGCAAGATGAAGAGGATTGCCTTTCAGTTCACGCCTTAC	FALSE	66	55	59	83	75	43	38	46	48	42	52	46
Pten	NM_008960.2	Endogenous	mRNA	Mm	CAGCCTTACCCCGATTCAGCCTCTTCAGATACTCTTGTGCTGTGCAGCAGTGGCTCTGTGTGTAAATGCTATGCACTGAGGATACACAAATATGACGTGT	FALSE	1892	1874	1367	1798	1079	1360	788	1400	1249	1638	1765	1759
Ptgs2	NM_011198.3	Endogenous	mRNA	Mm	CCATCAGTTTTTCAAGACAGATCATAAGCGAGGACCTGGGTTCACCCGAGGACTGGGCCATGGAGTGGACTTAAATCACATTTATGGTGAAACTCTGGAC	FALSE	39	62	44	47	39	29	35	42	21	62	47	41
Ptprn2	NM_011215.2	Endogenous	mRNA	Mm	CGCTCTGCCTCCTGCATCCTCCCAGATAACAAAACACATTAACACATTCTTACTGGATAATCCAATTTGCCAAAACATTTGGGCATTGTGCCCACCACCT	FALSE	858	714	646	923	625	623	396	645	535	796	793	835
Ptprr	NM_011217.2	Endogenous	mRNA	Mm	CTGTCTGTGTCGCCTCTCCGCCGCACAGAATCGATGTGTGTGATATTCAGAGACTGGAGGAGCTGCTGACATTATCCTGTGTTTAGATGCTTTAATGTTC	FALSE	95	80	92	118	70	57	28	74	71	89	87	118
Pvalb	NM_013645.3	Endogenous	mRNA	Mm	GAAGGCGATAGGAGCCTTTGCTGCTGCAGACTCCTTCGACCACAAAAAGTTCTTCCAGATGGTGGGCCTGAAGAAAAAGAACCCGGATGAGGTGAAGAAG	FALSE	374	348	421	445	326	275	165	329	258	400	373	465
Rab2a	NM_021518.3	Endogenous	mRNA	Mm	GGTGCAGCGGGGGCTTTACTAGTGTATGATATTACAAGGAGAGACACGTTCAACCACTTGACAACCTGGTTAGAAGATGCCCGTCAGCATTCCAATTCCA	FALSE	4681	4199	4207	4642	3674	3472	2260	3843	3121	4246	4253	5178
Rab3a	NM_009001.6	Endogenous	mRNA	Mm	AACCTGTTCTGACGTCGTGAGTGTCAAATGTGTCCCACTCCTCCCTAGAAGTTATGAACACTACACACAGTCAATAAAGCGAATGGACCTTGCTGAGTCT	FALSE	5158	4307	4251	5360	3630	3813	2525	4983	3683	4953	5383	5388
Rab3c	NM_023852.5	Endogenous	mRNA	Mm	AGTCTTCATGCCGATCCTGGCCACCTTTTGTGTGCACTCTCTGTGTGCTATGTGAGGCGATCCGGAAGTCCTTTCTGCTTGCTCTGAATGTGTGTCCACA	FALSE	581	523	433	738	386	482	274	493	446	581	543	534
Rac1	NM_009007.2	Endogenous	mRNA	Mm	GCCAAAATACCTTCTGAACTAAGTTGCGTTGTGCTGAGAACACCTAAGCACTAAACTCTCTTGAGAGACTTCTGTTGCTAAGAAGACCGCAGCTTCTGGA	FALSE	541	466	385	548	354	411	252	415	369	494	466	516
Rad23b	NM_009011.4	Endogenous	mRNA	Mm	ACCTCACACTCACACCAGTGCATTACACTAACCTTGTTCACTGGATTGTCTGGGGTGACTTGGGCTCATATCCACAATATTTGGTATACGGTAGTAGGTT	FALSE	635	579	536	674	488	463	364	536	412	567	582	618
Raf1	NM_029780.3	Endogenous	mRNA	Mm	CCTCAGATGATGGCAAGCTCACGGATTCTTCTAAGACAAGCAATACTATCCGGGTTTTCTTGCCGAATAAGCAAAGGACTGTGGTCAATGTGCGGAATGG	FALSE	330	284	291	323	278	263	139	214	193	312	240	278
Ran	NM_009391.3	Endogenous	mRNA	Mm	TGAGGAGTAGGGTGGGCTTCTCTGATGTGATAGTGTTAGTTGAGACTTAGGTGTGTGATCCCGGCACAACTGTGTTGCTCAGATGTATTTACAGCAAGCC	FALSE	233	236	219	280	209	197	136	195	160	246	229	273
Rapgef2	NM_001099624.2	Endogenous	mRNA	Mm	TTATAACTGGATAGCATTGCAGTGAGGCAGCTTGGGGTGTTGGAGCGAATGCCAGCTGTTTGTACTGCTCTTTCAAGACAGCCTCCCCTTGTTGGATTGG	FALSE	942	892	873	884	607	676	402	783	615	908	952	931
Rasgrp1	NM_011246.2	Endogenous	mRNA	Mm	ATACCAAACATGCGCTAAAATAAGTCTAGAGTTTCCTGAGGGTGTCCCAGGCAGCCCGCTTTACTGATTCATACTTAGATAAAGAGTCCCTGGTGAATCC	FALSE	933	851	815	1065	701	612	467	903	697	910	841	990
Rdx	NM_001104617.1	Endogenous	mRNA	Mm	AACGAATTTTGGCCTTATGTATGGGAAACCATGAACTGTACATGCGAAGGAGAAAGCCTGATACTATTGAAGTACAGCAGATGAAGGCTCAGGCCCGGGA	FALSE	189	180	172	184	150	144	82	131	137	185	157	154
Rela	NM_009045.4	Endogenous	mRNA	Mm	GAGGCTGACCTCTGCCCAGACCGCAGTATCCATAGCTTCCAGAACCTGGGGATCCAGTGTGTGAAGAAGCGAGACCTGGAGCAAGCCATTAGCCAGCGAA	FALSE	25	33	28	24	29	17	11	17	16	26	19	23
Ret	NM_001080780.1	Endogenous	mRNA	Mm	ATATGCTAACTGGATGGTTTCACCCTCAGCGGCAAAATTAATGGACACATTTGATAGCTAACATTCCTTTGTGAACGGTAATGGACTCCCAAGGGGGAAG	FALSE	13	13	19	7	4	8	6	10	7	2	9	14
Rhoa	NM_016802.4	Endogenous	mRNA	Mm	CCTGAGGCAGTTATACTTTGGAGGTGGCATAGCCTTTCTCACCTGGACTGCAGGGTCTGGCTCTAAGTCACAGTGCTCCTTTCTCCACACTGTATCCAAG	FALSE	449	384	385	468	331	412	222	369	330	384	397	422
Rims1	NM_053270.1	Endogenous	mRNA	Mm	GAGGAGAGGAACATTATCATGGCAGTGATGGACCGGCAGAAGGAAGAGGAGGAAAAAGAAGAGGCCATGCTCAAGTGTGTTGTCAGGGACATGGCGAAGC	FALSE	298	273	353	359	345	333	174	229	317	265	233	236
Ring1	NM_009066.3	Endogenous	mRNA	Mm	ACAGAATGCCAGCAAAACGTGGGAACTGAGTCTCTATGAGCTGCACCGGACCCCGCAGGAAGCCATCATGGATGGTACAGAGATTGCGGTTTCGCCTCGG	FALSE	150	125	176	185	157	141	77	124	106	153	152	131
Rit2	NM_009065.2	Endogenous	mRNA	Mm	GGCATGAATCTTGCTCGAGACTACAACTGTGCCTTCTTTGAGACATCTGCAGCCCTGCGATTCGGTATCGATGATGCTTTTCAAGGCTTAGTGAGAGAAA	FALSE	393	391	380	445	379	269	212	298	272	391	417	423
Rras	NM_009101.2	Endogenous	mRNA	Mm	GCCATGCGGGAGCAGTACATGCGTGCTGGCAACGGCTTCCTGCTGGTGTTTGCCATTAACGACAGGCAGAGTTTCAATGAGGTGGGCAAGCTCTTCACAC	FALSE	23	30	39	32	39	29	18	27	19	28	30	26
Rtn4	NM_194053.3	Endogenous	mRNA	Mm	CTGACAGTGTTCAGCATTGTCAGTGTAACGGCCTACATTGCCTTGGCCCTGCTCTCTGTGACTATCAGCTTTAGGATATATAAGGGTGTGATCCAAGCTA	FALSE	1941	1829	1802	2285	1792	1392	1137	2014	1434	1752	1881	2281
Ryr1	NM_009109.1	Endogenous	mRNA	Mm	AACAATGATTTCCAAAACTACCTACGGACACAGACTGGGAACACGACCACCATCAATATCATTATCTGCACAGTGGACTACCTCCTGCGGCTGCAGGAAT	FALSE	28	31	37	36	25	27	15	28	21	28	27	32
Ryr2	NM_023868.1	Endogenous	mRNA	Mm	GTTAATACAAATAGGGACATCACCATGTGGCTGAGCAAGCGGCTTCCTCAGTTCCTCCAGGTCCCATCAAACCACGAACACATTGAGGTGACCAGAATAG	FALSE	147	104	140	141	130	129	69	116	94	102	134	138
Ryr3	NM_177652.2	Endogenous	mRNA	Mm	GTTATGGGTATAACATTGAGCCTTCAGACCAAGAACTAGCTGATCCTACTGTCGAGAAGGTCAGCATAGACAAGATCCGGTTTTTCCGAGTAGAACGGTC	FALSE	9	4	10	10	9	4	4	6	6	9	6	6
S100b	NM_009115.3	Endogenous	mRNA	Mm	ACCGAGAATCAAAATTCTGCTCGGCAGACTTCTCCTTTCAGGATGATCGCTTTGTTCCTGGAGGACAGAGGAGGGGAATGGCCAGAGTCTTTTTCTAGTT	FALSE	445	440	374	500	304	430	214	312	324	383	361	392
Sart1	NM_016882.3	Endogenous	mRNA	Mm	AATCATTGCTGTTTTCAGACTGGTCACATGCGTGTTGCTAGGCCTTAGAGAGCCACTAACCACCCTGTGTTGTCCTGGTTACAGTTTTCAGGGTACTAAG	FALSE	20	15	17	15	22	7	10	18	14	17	18	19
Scamp2	NM_022813.3	Endogenous	mRNA	Mm	GGAGATCCCTGCTGACTACCAGCGGATTTGCAAGATGCTTTACTATCTCTGGATGTTGCATTCAGTGACTCTGTTTCTAAACCTGCTTGCGTGCCTGGCC	FALSE	32	40	36	32	33	32	16	44	31	33	31	47
Scn1a	NM_018733.2	Endogenous	mRNA	Mm	CCCACCAACGCTTCCCTTGAGGAACATAGCATAGAGAAGAATATAACTATGGATTACAATGGCACACTTGTAAATGAAACCGTGTTCGAGTTTGACTGGA	FALSE	1015	904	1011	1203	989	690	537	908	749	958	862	1059
Scn2a1	NM_001099298.3	Endogenous	mRNA	Mm	TGAAAAGATGGCACAATCAGTGCTGGTACCGCCAGGACCTGACAGCTTCCGCTTCTTTACCAGGGAATCCCTTGCTGCTATTGAACAACGCATTGCAGAA	FALSE	953	780	883	1038	780	619	473	781	577	857	971	1012
Sec23a	NM_009147.2	Endogenous	mRNA	Mm	TCAGGAGCTATTGGACCCTGTGTGTCTCTTAATTCAAAAGGACCTTGCGTGTCTGAAAATGAGATTGGAACAGGAGGCACTTGTCAGTGGAAAATCTGTG	FALSE	326	323	287	356	245	229	178	265	240	318	317	350
Serpinb6a	NM_001164117.1	Endogenous	mRNA	Mm	TCATTCACCATGTTAAGACCAATGGAATTCTGTTCTGTGGCCGGTTCTCCTCTCCCTGAGCAAAGGGTATTCCTGTCAGTCTTTGACCCTCTCTCCATGG	FALSE	91	82	95	103	87	79	48	105	73	72	88	89
Sf3a2	NM_013651.4	Endogenous	mRNA	Mm	GCAGAGCCTGCTGTTCCAGATTGACTACCCTGAGATCGCAGAGGGTATCATGCCACGCCACCGTTTCATGTCTGCTTATGAGCAGAGGATCGAGCCTCCA	FALSE	418	346	443	406	334	321	216	425	318	380	416	406
Sf3b2	NM_030109.2	Endogenous	mRNA	Mm	ACAGCCGTGGGGGCAGCAAGAAATACAAGGAGTTCAAATTTTAGGTCCTGCTCGCATAGCTGGCCTGCCTTTAGGCTCTTTGTATGTCTGGGCTTTCTCT	FALSE	526	474	446	538	412	369	248	394	347	460	505	521
Sf3b4	NM_153053.3	Endogenous	mRNA	Mm	GGAGGAACAGTATGAAAAAGGGAAGGTGTTTACATTGTAAGGATTTATCTTGCATGTACTTGGAATAGAGCTTATCTTGTTATAGTATGGAGGCATTAGC	FALSE	22	12	14	10	3	10	7	12	11	17	4	26
Sgpl1	NM_009163.3	Endogenous	mRNA	Mm	TGATTTCCGGGTGAAAGGTGTGACCAGCATTTCAGCAGATACTCATAAGTATGGCTATGCTCCTAAAGGTTCATCAGTGGTGATGTACTCTAACGAGAAG	FALSE	94	81	72	122	75	85	59	82	74	101	81	89
Sh3tc2	NM_172628.2	Endogenous	mRNA	Mm	GGGATGTCTCTTTCCATTTGGCAGGCCTACTTGGTTCTCCAGAATGCCACTAAGATCCTGGGTGTTCCTTCTTCAAACTGGTGTGAGGTTTCCGCCCTGG	FALSE	15	12	15	16	11	11	9	12	11	17	10	17
Shank2	NM_001081370.2	Endogenous	mRNA	Mm	TGTGGACAGGATCGTGCCCTGCTTGCTTAACTTGCTGTCTTTATTTCTGCAAACAGATTAGCATAATTCCAGGGTGGCCAAAATGAAGTCACACGGAGTT	FALSE	349	317	315	285	251	273	127	235	239	288	277	291
Shh	NM_009170.3	Endogenous	mRNA	Mm	AGGCCAAGCAACCTGCTGAAAGTCTATTTTTCTACATGTCCCTTGTCCTGCGTTTCAGAAGGCAAACCTCCGCATTCCTCTCCTGCTATGCTCCTGCTTT	FALSE	24	12	18	24	14	21	7	17	14	23	25	14
Sirt1	NM_019812.2	Endogenous	mRNA	Mm	GGATTCCTGACTTCAGATCAAGAGACGGTATCTATGCTCGCCTTGCGGTGGACTTCCCAGACCTCCCAGACCCTCAAGCCATGTTTGATATTGAGTATTT	FALSE	66	84	67	71	52	49	22	53	43	56	58	57
Sirt2	NM_022432.4	Endogenous	mRNA	Mm	TCCTTACCCAGAGGCCATCTTTGAGATCAGCTACTTCAAGAAACATCCGGAACCCTTCTTTGCCCTTGCCAAGGAGCTCTATCCCGGGCAGTTCAAGCCA	FALSE	465	416	451	459	390	368	198	377	327	458	401	461
Sirt7	NM_153056.2	Endogenous	mRNA	Mm	CGCCATCTCAGAGCTCCATGGGAATATGTATATTGAAGTCTGCACCTCCTGCATCCCTAACAGAGAGTATGTACGAGTGTTTGATGTGACTGAGCGTACT	FALSE	68	79	77	71	64	66	34	55	49	74	54	63
Sla	NM_001029841.1	Endogenous	mRNA	Mm	TTAGTCCTGGTTAATGCAGACAGACTGTCAACTTCAGCAGTCAGGAGAAGGGAGGGGGCTAACTCCTCATCTCAGAGACCAGTGAAGAATTTCAATAGAA	FALSE	8	6	5	10	4	7	6	5	7	6	6	8
Slc11a1	NM_013612.2	Endogenous	mRNA	Mm	CATGTACTTCCTGATTGAGGCCACCATCGCCCTATCGGTGTCCTTCATCATCAACCTCTTCGTCATGGCTGTTTTTGGTCAGGCCTTCTACCAGCAAACC	FALSE	1	2	4	3	3	5	4	3	1	2	5	5
Slc12a5	NM_020333.2	Endogenous	mRNA	Mm	TAGCTAGATGTTCCATGTCCATCCAGGTGACTTCTACTCTGAGTGCAATATTTCAGTAGCCTGGTAGTGAGAAGAGTGTCGCTTCTGTTTCAGCAGACCT	FALSE	2148	1905	1875	2309	1520	1470	1080	1742	1489	2016	2039	2271
Slc17a6	NM_080853.3	Endogenous	mRNA	Mm	TATTCGTTGGACCCATCACCATTTTAGAGAGCACAACTACAACAGTTGGCACATGTCATCCTACAGAAGTTAGGAAGCCAAAGCTACTGGATCATGCAAA	FALSE	282	221	215	306	190	132	119	194	158	257	233	219
Slc18a2	NM_172523.3	Endogenous	mRNA	Mm	TTGTTTTATGAAGCTTTCTGTGGGACCCTGGTGATGTGAAGTCTGGTGTGTTTAAGGGACAATTGGGTTCCCACTCTTAAGCCATTGGACAGTCATGGGT	FALSE	19	12	11	9	3	4	10	9	3	7	12	9
Slc18a3	NM_021712.2	Endogenous	mRNA	Mm	CTTAAGCGGGCCTTTCATTGATCGCATGAGCTACGACGTGCCGCTGCTTATTGGCCTGGGCGTCATGTTCGCCTCCACAGTCATGTTTGCCTTTGCAGAA	FALSE	1	8	4	8	4	7	2	2	2	5	6	5
Slc1a1	NM_009199.2	Endogenous	mRNA	Mm	TTGCTGGGAAGATCATAGAAGTTGAAGACTGGGAAATATTCCGCAAGCTGGGCCTTTACATGGCCACTGTCCTGAGCGGGCTTGCAATCCACTCCCTCAT	FALSE	127	103	154	156	128	124	66	119	107	140	127	145
Slc1a2	NM_001077514.3	Endogenous	mRNA	Mm	GGGAACTGCTTCCAGTGCTGGAACTTTGCCTGTTACCTTCCGTTGCTTGGAAGATAATCTAGGGATTGACAAGCGTGTGACCAGATTCGTCCTCCCAGTC	FALSE	5679	5704	5239	4677	4005	4580	2392	3427	3941	4831	4544	4998
Slc2a1	NM_011400.3	Endogenous	mRNA	Mm	GGACTCCATTTTAGGATTCGCCCATTCCTGTCTCTTCCTACCCAACCACTCAATTAATCTTTCCTTGCCTGAGACCAGTTGGAAGCACTGGAGTGCAGGG	FALSE	53	35	38	62	37	59	16	24	23	39	54	39
Slc32a1	NM_009508.2	Endogenous	mRNA	Mm	CCCGTTTGCCTGCCGGTTTTCAGGAACCCAAACTCATCTTGTGCAATGTATCCGGTCGTGGAACTGTATACTGTGCGTGTGGTGTGCTCGTGGTGAATAA	FALSE	293	266	284	333	223	208	160	267	203	303	283	324
Slc4a10	NM_001242380.1	Endogenous	mRNA	Mm	AAGCTTCAAACATCTTGGTAGGAGAACTGGAGTTCCTAGACAGAACTGTGGTTGCCTTTGTCAGGTTGTCTCCAGCTGTCTTGCTCCAAGGACTTGCTGA	FALSE	665	622	581	740	582	465	343	594	443	608	709	629
Slc6a3	NM_010020.3	Endogenous	mRNA	Mm	TGTGGATCGATGCCGCCACCCAGGTGTGCTTCTCCCTTGGCGTTGGGTTTGGGGTGCTGATTGCCTTCTCCAGTTACAATAAGTTCACCAATAACTGCTA	FALSE	1	2	3	2	1	1	2	1	1	2	1	3
Slc6a4	NM_010484.2	Endogenous	mRNA	Mm	AGTCCTAAAGACTATGGTGCCCAGACTCTTGTGGGTTCCAACCACTTCTTTCCATGAACTCTCTTGGACTTACTGCCACATTAGCTGGTGACACGGCTGA	FALSE	8	4	5	6	4	2	6	7	6	2	6	2
Slc8a1	NM_011406.2	Endogenous	mRNA	Mm	TGCAAATCACTCTTGGTTCATCTGAGCATCTTAAAGTTTCCCATAGGCCCTTTCATCACAGCATCATGTTGGCATGTGTGGCACACTTTCAAGGGAAAAA	FALSE	559	468	455	521	349	316	216	423	376	461	477	484
Slc9a6	NM_172780.3	Endogenous	mRNA	Mm	GATGTTTGCTGGTCTTCGTGGTGCAATGGCATTTGCCTTGGCCATTCGAGATACTGCCACTTATGCACGACAAATGATGTTCAGCACCACACTTCTGATC	FALSE	270	271	211	290	212	193	126	246	162	217	251	292
Slu7	NM_148673.3	Endogenous	mRNA	Mm	ATTATGATCCAAAAACCAGAGCGATGAGAGAGAATCCTTACGCCAATGCAGGGAAGAATCCAGATGAAGTGAGCTACGCTGGAGATAACTTTGTTCGATA	FALSE	474	467	468	503	345	392	195	403	317	445	441	473
Smn1	NM_011420.2	Endogenous	mRNA	Mm	GAAACCTGTGTCGTGGTTTATACTGGATATGGAAACAGAGAGGAGCAAAACTTATCTGACCTACTTTCCCCGACCTGTGAAGTAGCTAATAGTACAGAAC	FALSE	311	314	306	389	250	276	184	256	245	337	344	359
Smpd4	NM_001164610.1	Endogenous	mRNA	Mm	CGCAGTGCCTCGCTTTGTCCAGCAGAAGCTGTACGTCTTCCTGCAGCACTGTTTTGGCCACTGGCCTCTGGATGCAACCTTCAGAGCTGTCTTGGAGATG	FALSE	24	21	30	24	17	26	14	12	22	21	13	22
Smyd1	NM_009762.2	Endogenous	mRNA	Mm	CCTCAGGCCAAAAGTGTTTGACCCTTTGAGATATACTCAGTGATGCCTAGAAAGATGCAGGGATCTTGGGATCCTGTGGTCTTTACTCCTAATCAGAGCT	FALSE	1	1	2	3	1	1	1	1	1	1	4	5
Snap91	NM_001277986.1	Endogenous	mRNA	Mm	TGAATGGTTCCAATGCCTTTAGTGCTTTTCTGGACGTTGCCCGTGGACGGAGGATGACGCAGCTGTTCTGTGGTGAGCCATTTGGAAAGATGTGTCTGTG	FALSE	1962	1815	1609	2005	1385	1505	863	1586	1378	1769	1771	1772
Snca	NM_009221.2	Endogenous	mRNA	Mm	TGTGGCAGAGGCAGCTGGAAAGACAAAAGAGGGAGTCCTCTATGTAGGTTCCAAAACTAAGGAAGGAGTGGTTCATGGAGTGACAACAGTGGCTGAGAAG	FALSE	390	334	389	407	317	265	215	303	264	359	296	424
Sncaip	NM_001199151.1	Endogenous	mRNA	Mm	TCGCTGGATGGTGAGTGAGACAGAAGCCATTGCGGAATTGAGTTGTTCCAAGGATTTCCCAAGCCTTATTCATTACGCAGGTTGCTATGGGCAGGAAAAG	FALSE	8	5	10	9	8	5	1	9	7	8	7	8
Sncb	NM_033610.2	Endogenous	mRNA	Mm	CCCAAACACGAGATCTTCCTTCGGCTCTGAGGCACTTCCTCAGGGCCTGTGTTAGTGTCTGCCCTGCCCTTCCGTCTGTCCTACTTGCCCGCGTTCATCC	FALSE	321	250	272	323	235	227	145	215	200	297	270	254
Snrpa	NM_001046637.1	Endogenous	mRNA	Mm	AACCTGCCTGAGGAGACCAACGAGCTCATGCTCTCCATGCTCTTCAACCAGTTCCCTGGCTTCAAGGAGGTGCGTCTGGTCCCTGGGCGCCATGACATCG	FALSE	147	139	176	188	148	118	71	140	125	153	148	154
Sod1	NM_011434.1	Endogenous	mRNA	Mm	TGTGTCCATTGAAGATCGTGTGATCTCACTCTCAGGAGAGCATTCCATCATTGGCCGTACAATGGTGGTCCATGAGAAACAAGATGACTTGGGCAAAGGT	FALSE	1463	1416	1343	1508	1163	1155	804	1097	1023	1423	1463	1592
Sod2	NM_013671.3	Endogenous	mRNA	Mm	ATAGCTTTGCTCCTGCTTGAGGAGTGCTTATTATGAGAGGAAGGTAATGGTGCCTCTGGGTTTTCTATAGGCAGACATGCAAAAACAGCTAATCTTGTCT	FALSE	1192	1012	1060	1304	825	748	509	866	860	1136	958	1026
Sorcs3	NM_025696.3	Endogenous	mRNA	Mm	GTTGCCACGGGTAATATTGGCTCCGAACTCTCCTATACGGATATCGGTGTGTTCATCTCCTCTGATGGGGGCAACACATGGAGACAGATCTTTGATGAAG	FALSE	259	279	316	303	264	200	143	209	171	240	221	274
Sorl1	NM_011436.3	Endogenous	mRNA	Mm	GTGGATGCCGGCTTTAAAAAGATCGAGGTAGCTAATCCAGATGGTGACTTCCGACTGACAATCGTCAATTCCTCTGTGCTTGATCGACCCAGGGCTTTAG	FALSE	1255	1155	1404	1502	1194	895	614	1161	1065	1291	1162	1274
Sox10	XM_128139.6	Endogenous	mRNA	Mm	CCATCTCCTGTCTGCAGCCCAGTCCACATGTAACACATCGCTGCCCCTTTATTTATCTCCATAGTCGCCATGTTCCTATCCCTCTAGCTACTCCAGCCCC	FALSE	33	32	27	41	26	22	12	26	25	30	40	21
Sox9	NM_011448.4	Endogenous	mRNA	Mm	ACAAATGAGAGGTTTCAGATGCAGTGAGGAGCACTGAGTCCTTTGCAATGTTTTCAGCCATAGACCTTTGGGTCTGCCTGGACTGTATGTGGATGTGTGC	FALSE	287	279	247	279	156	247	135	205	207	260	264	272
Sp1	NM_013672.2	Endogenous	mRNA	Mm	CAACCCGGAAAACATTGCTTTGAAAGCTGCTGATAAAGCATGGGCAGGTTATTAGTTTGGTTTAGAAGACTGTGCGTCTCTTGGCTCTGCTCCGGGGTAC	FALSE	40	34	31	49	26	20	16	25	31	30	34	47
Sp100	NM_013673.3	Endogenous	mRNA	Mm	TTCCCAATGAATTGTGTTTCCAAGGAATTGATGGAGGGAACCCAAACTCCCAGCTAAGTCTTGAACAAGGACCTGGTGCCAGCTATTCTCAAGGAAGCCC	FALSE	11	12	9	14	8	11	2	5	7	9	6	11
Spast	NM_016962.2	Endogenous	mRNA	Mm	TCAGGCGTTTCATTAAACGGGTATATGTGTCCTTACCAAATGAGGAGACAAGACTCCTTCTGCTTAAAAACCTGTTGTGTAAACAAGGAAGTCCACTGAC	FALSE	385	377	317	401	314	291	197	305	281	369	351	397
Spi1	NM_011355.1	Endogenous	mRNA	Mm	TCGGATGACTTGGTTACTTACGATTCAGAGCTATACCAACGTCCAATGCATGACTACTACTCCTTCGTGGGCAGCGATGGAGAAAGCCATAGCGATCACT	FALSE	23	22	31	30	21	47	17	22	17	19	27	29
Sptbn2	NM_021287.1	Endogenous	mRNA	Mm	AGCTGTTACTGGATACCACGGACAAATTCCGATTCTTTAAGGCTGTCCGAGAGTTGATGCTGTGGATGGATGGGATTAACCTGCAGATGGATGCCCAGGA	FALSE	305	304	278	286	259	223	124	200	223	277	258	283
Sqstm1	NM_011018.2	Endogenous	mRNA	Mm	AGATAGGCCCAGTGTCTTGGCATTCTTGTAGAATCTTCAGGTGGGAATGTGTGATGCCTTTTCAGGCAATAGGAAAGTGCATGAGGAGAGTTTTGAATGT	FALSE	1373	1294	1306	1608	1154	995	740	1129	1051	1313	1428	1417
Src	NM_001025395.2	Endogenous	mRNA	Mm	TGCCAAGGGCCTAAATGTGAAACACTACAAGATCCGCAAGCTGGACAGCGGCGGTTTCTACATCACCTCCCGCACCCAGTTCAACAGCCTGCAGCAGCTC	FALSE	302	297	300	264	216	267	149	238	233	270	293	281
Sri	NM_001080974.2	Endogenous	mRNA	Mm	AATTCAGTTGCAAAGCGATACAGCACCAGCGGGAAGATCACGTTTGATGACTACATTGCCTGCTGTGTCAAACTGAGGGCTCTCACAGATAGCTTTCGCA	FALSE	227	243	213	231	201	191	122	169	150	217	212	227
Srsf4	NM_020587.2	Endogenous	mRNA	Mm	GATGCTCACAAGGGACGCAAAAACGAAGGAGTGATTGAATTTGTGTCTTACTCTGATATGAAAAGAGCTTTGGAAAAGCTGGACGGAACTGAAGTCAACG	FALSE	84	93	89	110	72	78	43	75	67	80	71	92
Stab1	NM_138672.2	Endogenous	mRNA	Mm	CAAGTTCTGGACAACTCCATTGCACTCCATCTCAATGCGTGGAGCTTACTGGATACCGTCTAGTTTTTGGAATCGTAACCACATGAGTAGGGGCTGCCAC	FALSE	23	25	28	46	30	36	22	41	31	35	29	31
Stambpl1	NM_029682.4	Endogenous	mRNA	Mm	CGCTGTCCTGCTTTTCCACCCACCAGAGCAACTCTCTGAGGAACGCATTTGCAGATCACCCTCATAAAAGTGATGGAAGCAATTTCGCTAACTACTCTCC	FALSE	178	188	151	195	165	126	93	161	114	178	181	174
Stat1	NM_009283.3	Endogenous	mRNA	Mm	ACGCTGGGAACAGAACTAATGAGGGGCCTCTCATTGTCACCGAAGAACTTCACTCTCTTAGCTTTGAAACCCAGTTGTGCCAGCCAGGCTTGGTGATTGA	FALSE	51	47	45	60	53	67	43	52	46	34	34	53
Stat3	NM_213659.2	Endogenous	mRNA	Mm	AGCTTAAAATTAAAGTGTGCATTGATAAAGACTCTGGGGATGTTGCTGCCCTCAGAGGGTCTCGGAAATTTAACATTCTGGGCACGAACACAAAAGTGAT	FALSE	63	68	94	75	68	66	35	47	64	54	61	57
Stx1a	NM_016801.3	Endogenous	mRNA	Mm	GTCACTGTGGACCGAGACCGCTTCATGGATGAATTCTTTGAACAGGTGGAAGAGATCCGGGGCTTTATTGACAAGATTGCCGAAAACGTGGAGGAGGTGA	FALSE	1643	1451	1752	1787	1341	1199	831	1328	1162	1569	1250	1690
Stx1b	NM_024414.2	Endogenous	mRNA	Mm	CGGACCTGCGCATCCGTAAGACCCAGCACTCCACACTCTCACGGAAGTTCGTGGAGGTAATGACCGAATATAATGCAACTCAGTCCAAGTACCGGGACCG	FALSE	3712	3551	4149	3580	3121	2747	1672	2664	2633	3322	2934	3305
Stx2	NM_007941.2	Endogenous	mRNA	Mm	TTCATGGACGGTTTCTTCCATCAGGTAGAGGAGATTCGAAGCAGCATAGCCAGGATTGCTCAGCATGTAGAAGACGTGAAGAAGAACCACAGCATCATCC	FALSE	49	48	58	49	63	33	24	40	39	53	45	46
Sucla2	NM_011506.1	Endogenous	mRNA	Mm	CATCGGCCTCGATGGGAGCATAGGATGTCTAGTAAATGGTGCTGGCTTGGCTATGGCCACAATGGATATAATAAAACTACACGGAGGGACTCCAGCCAAC	FALSE	1491	1397	1278	1555	1208	1024	802	1186	977	1327	1219	1548
Synj1	NM_001045515.1	Endogenous	mRNA	Mm	GGCATTTCTGGTGTCAAACAAGAGCCAACATTGAAGAGTGACCCATTTGAAGATCTCTCACTTAGTGTGCTTGCTGTATCAAAGGCTCAGCCTTCTGTTC	FALSE	520	432	468	535	383	370	227	417	350	452	458	467
Syt1	NM_009306.2	Endogenous	mRNA	Mm	ACAGCAACATCCTGACGGGAGAGGACCATCTTCACATCTACCAAAATAAAATGGAGGCATGGAAAGTGTGGCCTCCTGTTTGATCTATAGGATTTAGCTC	FALSE	1900	1547	1504	1941	1297	1228	863	1346	1271	1766	1494	1742
Syt13	NM_030725.4	Endogenous	mRNA	Mm	ACTCCATGTGACAGACCTGTTCTTCTCAGTATGCCTGTACTTCAGGACGAAGTAGCTCTGAGCTTGGCTTGTTCCATCTGGCTATGTAAATGAGGAGGTA	FALSE	695	708	691	772	559	594	343	595	555	641	655	752
Syt4	NM_009308.3	Endogenous	mRNA	Mm	TCTGGTCTCTCTCTGTTATCAGTCCACTACAAACACGCTCACTGTGGTGGTCTTAAAAGCGCGGCACCTACCGAAATCTGATGTGTCTGGACTTTCAGAT	FALSE	926	903	990	1146	836	706	498	961	644	1004	963	1115
Syt7	NM_018801.3	Endogenous	mRNA	Mm	TGGAATGAGACCTTTCTATTTGAAGGGTTTCCCTACGAGAAAGTGGTGCAGAGGGTCCTCTACCTCCAGGTCCTGGATTATGACCGTTTCAGCCGCAATG	FALSE	682	586	655	592	551	417	278	490	468	564	562	539
Taf10	NM_020024.3	Endogenous	mRNA	Mm	GCACACCTCTAGTGGACTTCTTGATGCAGTTGGAGGATTACACACCTACGATCCCAGATGCAGTGACTGGTTACTACCTGAACCGCGCTGGCTTTGAAGC	FALSE	431	465	446	452	409	334	230	369	283	408	436	477
Taf4	NM_001081092.1	Endogenous	mRNA	Mm	AGTTCACACGGCAAAGAATCACGCGGGTCAACCTCAGGGACCTCATATTTTGTTTAGAAAACGAGCGTGAGACAAGCCATTCACTGTTGCTCTACAAAGC	FALSE	59	52	50	57	56	48	25	40	30	47	48	50
Taf4b	NM_001100449.1	Endogenous	mRNA	Mm	ATACCGAAAGAATGCCAAACTCTCCTGGGGAAACATTTCAAGTATGTCACTCTCTGTCCTGTTCTTCCCATAGGGACTGTTATGGCCACATTCTATACTG	FALSE	36	28	23	38	17	21	12	12	21	20	24	38
Taf6l	NM_001177798.1	Endogenous	mRNA	Mm	ACTGGCCGCCTCCATCAACCCTTTGAATGACCACTGGACTCTGCGAGATGGGGCTGCCCTTCTACTCAGTCACATATTCTGGACGCATGGAGACCTTGTA	FALSE	9	16	18	19	12	13	11	17	15	13	17	22
Taf9	NM_027139.5	Endogenous	mRNA	Mm	CAGATGCTGGAGTTTGCCTTCCGATATGTGACAACAATTCTAGATGATGCTAAAATTTATTCCAGCCATGCTAAGAAAGCTACTGTTGATGCAGATGACG	FALSE	360	370	259	386	303	302	218	305	236	338	356	390
Tardbp	NM_001003899.2	Endogenous	mRNA	Mm	CAGCAGTAACATGGTAACATTAAAATGGTTTTCGGGGACCTCCAAAGACGGCCAGGAGTCCTGGGGTAAGTTACTTGTCAATGGCATGGTTTTGATCCCT	FALSE	298	266	275	316	243	201	140	231	204	278	253	252
Taz	NM_181516.5	Endogenous	mRNA	Mm	GACGCTTCCTCGAGTTGCTTTCCGGCTGATTCGTCGAGTGAGGCCGTCAAGACTTGGTTTCTAGTGCGCATTGCTTTGTACAGCAGTCCCGTCTCGTCGC	FALSE	153	162	173	172	169	142	76	121	101	143	156	159
Tbp	NM_013684.3	Endogenous	mRNA	Mm	GTGGCGGGTATCTGCTGGCGGTTTGGCTAGGTTTCTGCGGTCGCGTCATTTTCTCCGCAGTGCCCAGCATCACTATTTCATGGTGTGTGAAGATAACCCA	FALSE	81	74	84	86	80	50	42	58	55	90	80	73
Tbpl1	NM_011603.5	Endogenous	mRNA	Mm	GAGATCCGTTTGCCAGAATTTACAAAGAACAATAGACCTCATGCCAGCTATGAACCTGAACTTCATCCTGCCGTGTGCTATCGGATAAAGTCTCTAAGAG	FALSE	571	570	567	676	454	463	289	486	443	546	563	598
Tbr1	NM_009322.3	Endogenous	mRNA	Mm	CACGTCCTCCTTCCCAGGCCCGTTCTAGCGCACTCGCTCTTTCACTTGACCCTCGATGACCGTCTGCGGGGATAAGTGCAGGTCTCTCACTATGATTTTA	FALSE	131	104	120	110	93	101	49	95	106	112	101	100
Tcerg1	NM_001039474.1	Endogenous	mRNA	Mm	AGATGGGAAGGTTTATTACTACAATGCTCGGACTCGTGAATCTGCATGGACCAAGCCAGATGGAGTTAAGGTTATTCAGCAATCAGAACTGACGCCCATG	FALSE	186	164	181	172	152	160	113	145	117	165	167	162
Tcirg1	NM_001136091.1	Endogenous	mRNA	Mm	CTTCTTTGGGGGTCGATACCTACTCCTGCTCATGGGTCTGTTCTCCGTCTACACTGGCTTCATCTACAATGAGTGCTTCAGCCGAGCCACCACTATTTTC	FALSE	19	15	23	17	22	30	15	23	19	9	19	26
Tenm2	NM_011856.3	Endogenous	mRNA	Mm	AGGAAGTCCCACCAGGGGTGTTTTGGAGGTCCCAGATTCACATCAGTCAGCCTCAATTCTTAAAGTTCAACATCTCCCTGGGCAAGGATGCCCTCTTCGG	FALSE	588	445	571	605	471	395	259	450	371	514	536	534
Tfam	NM_009360.4	Endogenous	mRNA	Mm	CATCCGTCGAAGTGTGAAACGATCCGGAGACATCTCTGAGCATTAAGATGGAAGACGGAGTTGTCATTGGGATTAGGCCCAAGAAACCAGTTAGGTCTCA	FALSE	285	213	230	247	194	166	127	201	162	226	222	276
Tgfb1	NM_011577.1	Endogenous	mRNA	Mm	GGAGTTGTACGGCAGTGGCTGAACCAAGGAGACGGAATACAGGGCTTTCGATTCAGCGCTCACTGCTCTTGTGACAGCAAAGATAACAAACTCCACGTGG	FALSE	18	18	14	28	11	21	10	13	17	12	15	19
Tgfbr2	NM_009371.2	Endogenous	mRNA	Mm	TGTGCAAGTTTTGCGATGTGAGACTGTCCACTTGCGACAACCAGAAGTCCTGCATGAGCAACTGCAGCATCACGGCCATCTGTGAGAAGCCGCATGAAGT	FALSE	52	38	38	62	66	74	25	49	39	36	34	39
Th	NM_009377.1	Endogenous	mRNA	Mm	GGATGGAAATGCTGTTCTCAACCTGCTCTTCTCCTTGAGGGGTACAAAACCCTCCTCACTGTCTCGGGCTTTGAAAGTGTTTGAGACATTTGAAGCCAAA	FALSE	7	7	6	8	2	4	5	6	3	4	5	4
Thy1	NM_009382.3	Endogenous	mRNA	Mm	ACTTTTGTGAGCTTCAAGTCTCGGGCGCGAATCCCATGAGCTCCAATAAAAGTATCAGTGTGTATAGAGACAAGCTGGTCAAGTGTGGCGGCATAAGCCT	FALSE	2006	1902	2077	2437	2011	1551	1211	1758	1433	2030	1957	2185
Tie1	NM_011587.2	Endogenous	mRNA	Mm	GGGCTCAAGATGAACGCAGCCATCAAGATGCTAAAAGAGTATGCGTCTGAAAATGACCATCGAGACTTTGCAGGTGAACTAGAAGTTCTGTGCAAACTAG	FALSE	36	26	23	12	28	45	10	10	23	14	18	21
Tlr2	NM_011905.2	Endogenous	mRNA	Mm	GCAGGCGGTCACTGGCAGGAGATGTGTCCGCAATCATAGTTTCTGATGGTGAAGGTTGGACGGCAGTCTCTGCGACCTAGAAGTGGAAAAGATGTCGTTC	FALSE	4	12	10	20	9	20	9	8	7	7	9	11
Tlr4	NM_021297.2	Endogenous	mRNA	Mm	AACGGCAACTTGGACCTGAGGAGAACAAAACTCTGGGGCCTAAACCCAGTCTGTTTGCAATTAATAAATGCTACAGCTCACCTGGGGCTCTGCTATGGAC	FALSE	7	11	3	3	7	7	5	3	6	6	5	5
Tmem119	NM_146162.2	Endogenous	mRNA	Mm	TGGCTACTCTAAGGGTTCCTGCTGGGCTGGCTTTGCTACGCTTTCCTCAAGCTGCTTTCTTATTACCAGGATGCCTCACAGCTACAAAGTCCAATCTCAC	FALSE	62	65	66	78	56	71	33	63	53	60	65	78
Tnc	NM_011607.1	Endogenous	mRNA	Mm	GCAAAAATGGACGTGAGGACTTCTATCGCAACTGGAAGGCCTATGCTGCTGGGTTTGGAGACCGCAGAGAAGAATTTTGGCTTGGACTGGATAACCTGAG	FALSE	16	21	19	21	10	15	11	13	14	21	16	14
Tnf	NM_013693.2	Endogenous	mRNA	Mm	TGGATCTCAAAGACAACCAACTAGTGGTGCCAGCCGATGGGTTGTACCTTGTCTACTCCCAGGTTCTCTTCAAGGGACAAGGCTGCCCCGACTACGTGCT	FALSE	2	2	5	1	1	3	1	1	1	2	1	5
Tnfrsf10b	NM_020275.3	Endogenous	mRNA	Mm	CTGGTTCACATAAGATCCCATATAATGTGCAGGATGGCTAAACTTGCTGAGAGCTGACTCTGTGGTCTCCTGTCCCAGATTCTAGCGATATTCATTACTA	FALSE	6	3	2	6	2	3	3	1	1	2	3	4
Tnfrsf11b	NM_008764.3	Endogenous	mRNA	Mm	TTCTCAGGTGAGACTTCATCGAAAGCACCCTGTATAAAACACACGAACTGCAGCACATTTGGCCTCCTGCTAATTCAGAAAGGAAATGCAACACATGACA	FALSE	27	47	41	32	34	30	17	43	26	30	33	47
Tnfrsf12a	NM_001161746.1	Endogenous	mRNA	Mm	AGCCTCAATCTGGGTCACAAAGCGACCCATACTAAGGAACTGCAGCATTTGCACAAGGGAATCTCTTGTTCCCCACAAGTCCTGGCAGTCTGGCTGACTT	FALSE	18	20	22	30	26	30	11	34	17	28	25	26
Tnfrsf1a	NM_011609.2	Endogenous	mRNA	Mm	CTCCTTGCCAAGCTGACAAGGACACGGTGTGTGGCTGTAAGGAGAACCAGTTCCAACGCTACCTGAGTGAGACACACTTCCAGTGCGTGGACTGCAGCCC	FALSE	33	24	22	37	24	34	14	27	17	35	21	19
Tnfrsf1b	NM_011610.3	Endogenous	mRNA	Mm	GTGTGTGTCCATGTTTGCATGTATGTGTGTGCCAGTGTGTGGAGGCCAGAGGTTGGCTTTGGGTGTGTTTGATCACTCTCAGTTACTGAGGCAGGGCTCT	FALSE	6	14	11	16	14	11	8	16	14	18	5	12
Tnr	NM_022312.3	Endogenous	mRNA	Mm	GGAATTGATCCTCCCAAAAACATCACAATTAGCAACGTGACTAAGGACTCCCTGACGGTGTCCTGGAGCTCTCCTGTTGCGCCTTTTGATTACTACCGAG	FALSE	270	244	303	349	285	194	130	257	167	250	258	245
Tor1a	NM_144884.1	Endogenous	mRNA	Mm	GGAGGCGCTGCAGAAAGATCTGGATAACAAGCTCTTTGGACAGCATCTTGCAAAAAAAGTCATCCTAAACGCCGTGTCTGGTTTCCTAAGCAACCCGAAG	FALSE	190	146	163	159	144	118	79	122	122	142	142	168
Tpm1	NM_024427.4	Endogenous	mRNA	Mm	GCCGAGAAGGCTGCAGATGAGAGTGAGAGAGGCATGAAAGTCATTGAAAGCCGAGCCCAAAAAGATGAAGAAAAGATGGAGATTCAGGAGATCCAGCTGA	FALSE	498	420	516	513	417	398	265	419	306	449	462	442
Tradd	NM_001033161.2	Endogenous	mRNA	Mm	AGGTAGCTTCTGCAGGTTCGAAGTTCCCGGTTTCCTCTCCGACCGAGGAGAAACCACTGCCGGCCGCCTGCCAGACTTTTCTGTTCCACGGGCAGCTCGT	FALSE	5	6	3	3	4	2	2	4	4	2	3	5
Trem1	NM_021406.5	Endogenous	mRNA	Mm	GTGGCTCCTGTGCTTTCTCTAGGACACACTGGCATTTGCTTGTTTCCACCTCTTTGGGTGGGAAAAGGATGGTAGATCCATTCCTTCTACTTCAGCAGTG	FALSE	2	1	2	3	1	2	2	1	1	1	1	2
Trem2	NM_031254.2	Endogenous	mRNA	Mm	GAATCAAGAGACCTCCTTCCCACCCACCTCCATTCTTCTCCTCCTGGCCTGCGTTCTCCTGAGCAAGTTTCTTGCAGCCAGCATCCTCTGGGCTGTGGCC	FALSE	70	75	78	204	131	106	77	125	122	91	53	51
Trf	NM_133977.2	Endogenous	mRNA	Mm	AGGAGACTTTATTTGGGGGAAGTGACTGCACCGGCAATTTCTGTTTGTTCAAGTCCACCACCAAGGACCTTCTGTTCAGGGATGACACCAAATGTTTCGT	FALSE	2202	2283	2217	3543	2531	1889	1367	1677	1951	2339	1988	2318
Trim28	NM_011588.3	Endogenous	mRNA	Mm	CCTCTTGGGCTCTGGAGAGTGATAACAATACAGCTCTCTTGCTCTCTAAGAAGCTGATCTATTTCCAGCTGCATCGGGCCCTCAAAATGATTGTGGATCC	FALSE	242	216	200	268	208	200	121	208	171	233	212	242
Trim37	NM_197987.2	Endogenous	mRNA	Mm	CGACTAGATACACAGCTGAAGAATAAGCTCATAACTCTCATGGGTCAGAAGACATCTCTTACTCAAGAAACGGAGCTGTTGGAATCTTTACTTCAGGAGG	FALSE	1621	1552	1441	1726	1220	1301	842	1329	1169	1534	1375	1591
Trp53	NM_011640.1	Endogenous	mRNA	Mm	CCCTCTCTGAGTAGTGGTTCCTGGCCCAAGTTGGGGAATAGGTTGATAGTTGTCAGGTCTCTGCTGGCCCAGCGAAATTCTATCCAGCCAGTTGTTGGAC	FALSE	46	45	35	39	39	30	29	34	20	25	39	33
Trpm2	NM_138301.2	Endogenous	mRNA	Mm	TGCAGGGAGTGAGCCTCCGGTCCCTCTATAAGCGATCAACAGGCCACGTTACCTTCACCATTGACCCAGTCCGTGACCTTCTCATTTGGGCCGTTATCCA	FALSE	107	120	130	153	113	108	66	101	95	112	114	118
Trpv1	NM_001001445.1	Endogenous	mRNA	Mm	GAGAAGATGATCCTCAGAGACCTGTGTCGGTTTATGTTCGTCTACCTCGTGTTCTTGTTTGGATTTTCCACAGCCGTAGTGACACTGATCGAGGATGGGA	FALSE	2	2	7	6	2	1	4	6	4	5	2	4
Tspo	NM_009775.4	Endogenous	mRNA	Mm	GACACTGGCTCCCATCTGGGGCACACTGTATTCAGCCATGGGGTATGGCTCCTACATAGTCTGGAAAGAGCTGGGAGGTTTCACAGAGGACGCTATGGTT	FALSE	21	12	17	14	23	39	16	19	14	12	21	13
Twistnb	NM_172253.2	Endogenous	mRNA	Mm	TCGCTTAGATTCAGATTCTGCTGGAGTGTTCTGCATTCGAGGAAAACTGAGTACCACCAGTTTGCAACTTAAGCACTCTGCAGTTTCTGAAGATGTAGCA	FALSE	74	76	68	82	67	62	49	50	49	61	71	89
Txnl1	NM_016792.2	Endogenous	mRNA	Mm	TAGGTTAGCTTCACTGTTGATATCCTTGGGTACCTGCCTTCCAAATGGTGGGATTGTAGGCCTGTACCACTAAACCTGGTCTCATGCCAAGATTTTAACT	FALSE	262	222	239	249	180	156	110	196	155	216	213	242
U2af2	NM_133671.3	Endogenous	mRNA	Mm	GCGGCCGCCTAAGCATGTCGGACTTCGACGAGTTCGAGCGGCAGCTCAACGAGAATAAACAAGAGCGGGACAAGGAGAATCGGCACAGGAAGCGTAGTCA	FALSE	30	29	26	24	33	21	10	20	15	29	30	30
Ube2k	NM_016786.3	Endogenous	mRNA	Mm	CCTTAAGTCTGAACACAGATCCTCTGTGCCTGTGAATTTACTTGCATGCTTGTACTTGACTTCTTAGAACGGGTAGCCGAAAAGACCACCCTTTTAAGCA	FALSE	699	666	563	696	466	489	337	616	517	666	702	672
Ube2n	NM_080560.3	Endogenous	mRNA	Mm	ATCCTGAAAGCCAGAGCTGCTCCTAGTCATAGCTGATGCCTTACACATTACCCACAGTGGCCTGGTGGGCAGAGGTTTCAGTTTTCCCAGTTTACATTAG	FALSE	610	541	457	687	354	367	276	415	414	510	443	545
Ube3a	NM_173010.3	Endogenous	mRNA	Mm	AGTTCAAGGACAGCAGTTGAATCCGTATTTGAGACTCAAAGTCAGACGTGACCATATTATAGATGATGCACTGGTCCGGCTAGAGATGATTGCTATGGAA	FALSE	880	799	858	946	670	552	400	726	588	798	810	845
Ubqln1	NM_152234.2	Endogenous	mRNA	Mm	TGTGTGCTCTCTCTGCCTTACGCCTCAGTCTGTGGTTGGAAGACTTTGTACTGGTGAATGGCAATATGCAGGTGGGGCAGTGTCAAAAGCAGTTTGATTT	FALSE	167	165	177	155	140	125	112	137	117	174	180	154
Uchl1	NM_011670.2	Endogenous	mRNA	Mm	CCTGCTCAGGCTTTCCCAGTGAGCGAGGCCGGCGCTTTATAACAGCAGCCTGGGCGGCTCCACCGGCTGTTTTTTCGGCTCCTCGGGTTTGTGTCTGCAG	FALSE	13	14	14	11	10	8	9	11	10	9	10	22
Ugcg	NM_011673.3	Endogenous	mRNA	Mm	TATGTAGCCGACAGACAAGGCTTTGCTGCCACCTTAGAGCAGGTATATTTTGGAACTTCACACCCAAGATCCTATATCTCTGCCAATGTAACTGGCTTCA	FALSE	778	733	734	902	623	482	413	673	587	807	727	853
Ugt8a	NM_011674.4	Endogenous	mRNA	Mm	TGCTGTTGGAATAGCAAGGGCTGCTAAAATCATCATTGTGCCGCCAATTATGTTTGAAAGCCATTTGTACATTTTCAAGACACTAGCATCGGCCTTGCAC	FALSE	146	122	119	157	120	86	66	113	105	141	110	131
Unc13a	NM_001029873.2	Endogenous	mRNA	Mm	ATCTTTCAAGATGCCCTCAATTCTCAGTCAACACGTGACTTGGGACACATACCCGGGGAGTGTTCATGAGTGCATGGCGTTGAGATGTTTTGCACTATTT	FALSE	783	665	691	877	592	604	412	580	546	645	549	726
Usp21	NM_013919.4	Endogenous	mRNA	Mm	CCCGAATCCTCGTGCTCCATCTGAACCGATTTTCCACCTCCCGAGGCTCCATCAAGAAAAGTTCAGTAGGTGTAGACTTCCCACTGCAGAGACTAAGCCT	FALSE	56	50	56	54	51	56	23	41	31	63	56	59
Usp30	NM_001033202.3	Endogenous	mRNA	Mm	GCATGATACCTGAGCAGAAGTGGAGCAAAATCCTGCAGTTTGGCTTTAGGGCCATGCTCTAAGAGTGTGTGACTCTCATGGTTTCAATAAGCAAACGGTA	FALSE	132	133	100	156	121	117	63	101	102	141	141	140
Vcp	NM_009503.3	Endogenous	mRNA	Mm	ATAGAGTTGTTCGGAATAACCTCCGAGTTCGCCTAGGAGATGTCATCAGCATCCAGCCATGCCCTGATGTAAAGTATGGCAAACGTATCCACGTTCTACC	FALSE	726	600	786	864	644	510	368	689	557	749	688	707
Vegfa	NM_001025250.3	Endogenous	mRNA	Mm	TCTCTCTCTCCCAGATCGGTGACAGTCACTAGCTTGTCCTGAGAAGATATTTAATTTTGCTAACACTCAGCTCTGCCCTCCCTTGTCCCCACCACACATT	FALSE	168	170	134	152	118	136	69	126	125	139	104	151
Vip	NM_011702.2	Endogenous	mRNA	Mm	GAAATGCCAGGCATGCTGATGGAGTTTTCACCAGCGATTACAGCAGACTTCTGGGTCAGATTTCTGCCAAAAAATACCTTGAGTCACTCATTGGCAAACG	FALSE	531	687	609	646	549	524	365	586	454	448	653	677
Wfs1	NM_011716.2	Endogenous	mRNA	Mm	CGCAGATCCTGCTGGAGGGTGGTTCTCTTTAGCACTGTCCACTTTGAATGCCGAGTGTCATAAGAAATTGCATGCTATCTTCACTCACAATCCTGCCCTT	FALSE	205	161	175	202	145	165	95	126	109	177	237	134
Xab2	NM_026156.2	Endogenous	mRNA	Mm	CTTTGAGGAGAGCTTCAAGGCATATGAGCGTGGCATCTCACTGTTCAAGTGGCCCAATGTTTCAGACATCTGGAGCACCTACCTGACCAAATTCATCTCG	FALSE	128	126	133	161	156	107	80	122	103	104	145	144
Xbp1	NM_013842.2	Endogenous	mRNA	Mm	CCTCTAGTTTTAGAGATCCCCTCTGAGACAGAGAGTCAAACTAACGTGGTAGTGAAAATTGAGGAAGCACCTCTAAGCTCTTCAGAAGAGGATCACCCTG	FALSE	266	305	309	337	236	203	154	297	188	292	283	345
Xiap	NM_009688.2	Endogenous	mRNA	Mm	AGTCAAACTTCATTGCAGAAAGACATTAGTACTGAAGAGCAGCTAAGGCGCCTACAAGAGGAGAAGCTTTGCAAAATCTGTATGGATAGAAATATTGCTA	FALSE	571	568	528	517	429	433	251	400	369	502	565	556
Xk	NM_023500.2	Endogenous	mRNA	Mm	GTACCCATTTCCAATTTCAGGTCATGCCTTGAGAGTGAGATTAGCGCCACTCTGACACTTCCTAGGCAGGTTCGGAATTAGACAAGGGTAAGGATACTTG	FALSE	35	31	26	36	18	14	17	26	20	25	29	36
Zfp24	NM_021559.2	Endogenous	mRNA	Mm	GTAGTTCTCTTGCCAGTGTGCTGTGTTTGGAGGGAGATGTCGGCTCAGAGTCAGCTAGTCAGCTCTTAGCATTCTTCAGAGGTGAGTTCAAATCACACTC	FALSE	45	35	33	49	24	30	16	40	25	28	38	52
Aars	NM_146217.4	Housekeeping	mRNA	Mm	GTCTACCACCACACTTTCTTTGAGATGCTGGGCTCCTGGTCTTTTGGGGACTATTTCAAGGAATTGGCATGTAAGATGGCCCTGGAACTTCTTACCCAGG	FALSE	350	345	371	409	287	245	190	319	260	348	305	321
Asb7	NM_080443.2	Housekeeping	mRNA	Mm	CTGTATTCTATGGTAACGGAAGGGCTGTCCAGTTGCTGATGTGGTTGTGGTGACCATGCAGGTCTGCCCCTGAATTTGTTATCAGAGAAGCAGTCTGTGG	FALSE	16	20	14	20	8	13	11	15	11	17	17	25
Ccdc127	NM_024201.3	Housekeeping	mRNA	Mm	TTGGCAGCATTTCGTTGGATTTGGTCTAGGGAATCCCAAAAAGAGATAGAAAAAGCCAGAAAAGCATATCATCAGAGAACAGCTGCTTTCCAACAGGATC	FALSE	727	713	725	707	582	523	355	530	462	664	585	678
Cnot10	NM_153585.5	Housekeeping	mRNA	Mm	GCTTTTTGCTCGTAGACTTGTATATATTAACCCACCAGGCTGAGAAAGCTCTGCATCTTCTTGCCGTCCTAGAAAAAATGATTTCACAGGGTAGCGGTGG	FALSE	107	100	108	104	95	89	55	68	82	109	99	110
Csnk2a2	NM_009974.3	Housekeeping	mRNA	Mm	CCATTCTTCCACGGGCAGGACAACTATGACCAGCTTGTTCGAATTGCCAAGGTTCTGGGGACAGATGAACTATATGGTTATCTGAAGAAGTACCACATAG	FALSE	183	168	177	191	149	143	95	138	115	143	137	181
Fam104a	NM_138598.5	Housekeeping	mRNA	Mm	TTAGTATGTAGATGTCTGTCTATGGGATGCTCTCCCTTGGAACAGAACAGCCGTCCACTCGGAAGACCAGGGACGTTAAGCACATTTCCTAGTTGTGGTC	FALSE	138	107	90	89	60	73	56	90	71	104	114	104
Lars	NM_134137.2	Housekeeping	mRNA	Mm	TTAAGCGGCCTGAAAGGGAAAAATATCTTCCTAGTAGCTGCTACACTCAGACCTGAGACTATGTTTGGGCAGACAAATTGTTGGGTTCGGCCTGATATGA	FALSE	208	183	190	217	201	152	113	194	152	216	183	190
Mto1	NM_026658.2	Housekeeping	mRNA	Mm	TCCAAATCGTCTGCATCAGGTTTGGTTGGAGCCTGAAGGAATGGATTCCGACCTCATCTACCCGCAAGGGTTATCTGTTACACTGCCAGCTGAGTTACAG	FALSE	129	118	109	132	100	101	64	102	87	124	116	133
Supt7l	NM_028150.1	Housekeeping	mRNA	Mm	TGATCTACAGTTGCCAGAGACGGAAGCACACACCTTTAGGAGATCGTTTACATTAAGCTGGAGAGCCCTTCTCTGCTTGCTCTAAAATGCTGAGGTACTG	FALSE	24	26	32	38	31	37	16	29	25	37	37	28
Tada2b	NM_001170454.1	Housekeeping	mRNA	Mm	GGTGTTTCCAGCACCAGAATCCCAGCTTGGTGAGGTTTGAAGTTTCAGTGTGTCTTCTACAAAATGACAGCCACATCTACATTAGCTTGAGAAGCAGAGG	FALSE	90	107	81	78	71	87	39	69	57	87	80	94
NEG_A	ERCC_00096.1	Negative Control	SYSTEM	CUS	AACCGCCGCATACGGCCGATTGTCGCAGCCCGGGTCGATTATAACAACGGTGCAATCTCAGCTAAACCGACGCAGTTTTGCTCCTTGGATTCTGAGCCCG	FALSE	1	5	1	1	1	4	3	2	1	1	3	1
NEG_B	ERCC_00041.1	Negative Control	SYSTEM	CUS	GCACTGGCATTGGTCGTTTCAGGAGGCCATACAGAACTGGTTTATATGAAGGAACATGGATCATTTGAAGTCATTGGGGAAACCCTTGATGATGCGGCAG	FALSE	2	5	3	6	3	1	1	4	3	5	6	2
NEG_C	ERCC_00019.1	Negative Control	SYSTEM	CUS	GTACAGGCTGCTGGCTCATGTTTCCTTCTACGCTGCACTTGCGGGCATAGAGGTCGGTTGCGATCTATATTCGGAGATAACTATTCACCCAGCGCCACTC	FALSE	2	1	3	4	2	1	1	1	2	6	6	5
NEG_D	ERCC_00076.1	Negative Control	SYSTEM	CUS	AGAGATCACGTGGACCAAAGCTGATTGATTACGGGACTGGCCGTAAGTGCTGCCCGCGAGTAGATCGTCTAGATCCGGCTAAAATTCCCTGCGGTGCCTT	FALSE	9	14	9	8	8	8	4	9	4	10	11	8
NEG_E	ERCC_00098.1	Negative Control	SYSTEM	CUS	CCCAGATGACCTTCTCCCTCATAATCACTTAATCTGAGCGCAGGAGGCAGGCTGTATTAATTCCGGCCTCCAACCGGACCGTGGAACGACGCGACCAAGT	FALSE	7	5	8	12	5	4	9	4	2	6	4	6
NEG_F	ERCC_00126.1	Negative Control	SYSTEM	CUS	GGGTCCTTACCGGCTGTAAGCTCACTACAATCCAGGTACAGAGTGCGTTAACCGGCCATTAGAGGGCCGCTACACCCGTCAGAATTTAAACGTATGGGCG	FALSE	2	7	4	5	5	2	1	12	10	9	3	8
NEG_G	ERCC_00144.1	Negative Control	SYSTEM	CUS	ACCCGTATGAACTGTTGCCGGCTCGGAAATGTTAAGGCTCTGCGCACGCACTTTATCATTCGCAGCCTGTTCTGTCAGCGGGTCAGCCTAGGTTACGGTG	FALSE	1	1	2	1	1	1	1	1	1	2	1	2
NEG_H	ERCC_00154.1	Negative Control	SYSTEM	CUS	TTGGTCCGAGGAGGCATATAGGAAACGATGGGCACGCGCTATTCAGACGTTATTTGGTATGGAGTAAGAGGCCGGAAACTGGGCTCGATTGATGGATACT	FALSE	2	5	4	7	2	2	1	3	3	4	2	1
POS_A	ERCC_00117.1	Positive Control	SYSTEM	CUS	TCAGGCCTTGCCCTTACTAATGGCGCGTTGTAACGGGCCTTGAGGGAATGTCACTATTGAGGCACCCGTTCGACCCTCAGAGATATACCATTCCGCCTAT	FALSE	8170	8265	8568	9326	6781	6705	7782	6394	6710	7564	8283	8104
POS_B	ERCC_00112.1	Positive Control	SYSTEM	CUS	ATGAAAGCGCTGCTACTATGATAAGAGTACACGTACAGGTCTCGCCCGATTGGATTATGGCGAGCTGCCGCATTGACGGACATACCTTTGAACGTAATCG	FALSE	2152	2124	2216	2440	1833	1692	2111	1638	1725	2003	2145	2202
POS_C	ERCC_00002.1	Positive Control	SYSTEM	CUS	GCCGCTTTCGCTCGGGTCTGCGGGTTATAGCTTTTCAGTCTCGACGGGCTAGCACACATCTGGTTGACTAGGCGCATAGTCGCCATTCACAGATTTGCTC	FALSE	486	521	528	470	413	375	527	431	411	443	488	489
POS_D	ERCC_00092.1	Positive Control	SYSTEM	CUS	TACCTGGCATTTGGGCACTTCTTGCGTTTAAGCGGGAAAGATCGCGAGGGCCCGCTATTTGCGATACTTCCCATGTCGGTGCCGTCGCCTCTATGTACTC	FALSE	197	189	205	229	161	148	195	161	161	196	180	197
POS_E	ERCC_00035.1	Positive Control	SYSTEM	CUS	GGTTGAATTTGAGCGGATGGGCTCAACTGCGTCGTAACCGGTAGATACAGGGCATACGAGCCTCCCTATTTAACGGCATCATCCCGCGTAGTGCTGGTCA	FALSE	33	20	19	26	14	13	18	19	22	18	16	17
POS_F	ERCC_00034.1	Positive Control	SYSTEM	CUS	ACGAAGCTGTTCGGCCGCACGCAAGTACCTCCCACTTAGAAAGCGAATAACCCAACGACCGTGTTCAACCCTGGCCGTCTCTCAACCAGGTATGCAATCA	FALSE	10	11	16	14	15	19	17	12	16	17	21	23
